# Supplementary material for: Regio- and diastereoselective transition metal-free hydroalkylation of N-allenyl sulfonamides by push–pull 2-alkynylquinolines
Source: Royal Society of Chemistry journal article supplement (doi:10.1039/d2ob01362b), 2022-01-01
Supplement: d2ob01362b1.pdf [file d2ob01362b1.pdf]

## SUPPORTING INFORMATION

### **Regio- and diastereoselective transition metal-free hydroalkylation of *N*-allenyl sulfonamides by push-pull 2-alkynylquinoline**

Reza Dehghanpour Kalan,<sup>†</sup> Kamran Amiri,<sup>†</sup> Frank Rominger,<sup>‡</sup> Saeed Balalaie,<sup>†\*</sup> Hamid Reza Bijanzadeh <sup>‡</sup>

<sup>†</sup>Peptide Chemistry Research Institute, K. N. Toosi University of Technology, P. O. Box 15875-4416, Tehran, Iran

<sup>‡</sup>Organisch-Chemisches Institut der Universität Heidelberg, Im Neuenheimer Feld 271, D-69120 Heidelberg, Germany

<sup>‡</sup>Department of Environmental Sciences, Faculty of Natural Resources and Marine Sciences, Tarbiat Modares University, P.O.Box 46414-356, Noor, Iran

\*E-mail: Balalaie@kntu.ac.ir

## TABLE OF CONTENTS

|                                                                                                     |    |
|-----------------------------------------------------------------------------------------------------|----|
| 1. Experimental.....                                                                                | 3  |
| General Information.....                                                                            | 3  |
| General Procedure for the Synthesis of ( <i>Z</i> )-2-(2-hydroxy-2-alkynyl)quinoline-3-carbaldehyde |    |
| General Procedure for the Synthesis of <i>N</i> -allenyl <i>sulfonamides</i> .....                  | 3  |
| General Procedure for the Synthesis of the Linear Homoallylic Quinolines .....                      | 4  |
| Procedure for the Synthesis of <b>3a</b> on a scale of 1 mmol .....                                 | 4  |
| 2. Analysis of Spectral Data.....                                                                   | 5  |
| 3. <sup>1</sup> H NMR, <sup>13</sup> C NMR, and HRMS-ESI Spectra.....                               | 18 |
| 4. X-ray Crystallographic analysis.....                                                             | 72 |
| 5. References.....                                                                                  | 79 |

## 1. Experimental

### 1.1. General Information

All the required chemicals and solvents in this project were purchased from Sigma-Aldrich, Fluka, and Merck) and were used without further purification. Analytical thin-layer chromatography (TLC) was performed on aluminum-coated plates of silica gel (MERCK, 60 F<sub>254</sub>) and detected under ultraviolet irradiation (254 nm). Column chromatography separations of products were performed with Merck silica gel 60@ (230-400 mesh). Melting points (m. p.) were determined in capillary tubes with an Electrothermal 9100 digital melting point apparatus and are uncorrected. <sup>1</sup>H- and <sup>13</sup>C NMR spectra were acquired from a Bruker Avance 300 and 400 MHz spectrometer. The chemical shifts ( $\delta$ ) and the coupling constants ( $J$ ) are reported in ppm and Hz, respectively. The abbreviations of multiplets peak patterns are indicated as follows: *s*, singlet; *d*, doublet; *t*, triplet; *q*, quartet; *m*, multiplet, complex pattern; and *brs*, broad singlet. High-resolution mass spectra (HRMS-ESI) was run on a Waters LCT Premier XE™ TOF (Time of Flight) mass spectrometer in positive ionization mode. Single-crystal X-ray data for compound **3a** was measured at room temperature (298 K) on a Bruker APEX-II Quazar area detector (CCDC: 2175887).

### 1.2. General Procedure for the Synthesis of (Z)-2-(2-hydroxy-2-alkynyl)quinoline-3-carbaldehyde

The (Z)-2-(2-hydroxy-2-alkylvinyl)quinoline-3-carbaldehyde was synthesized the same as previously reported procedures:<sup>1</sup>

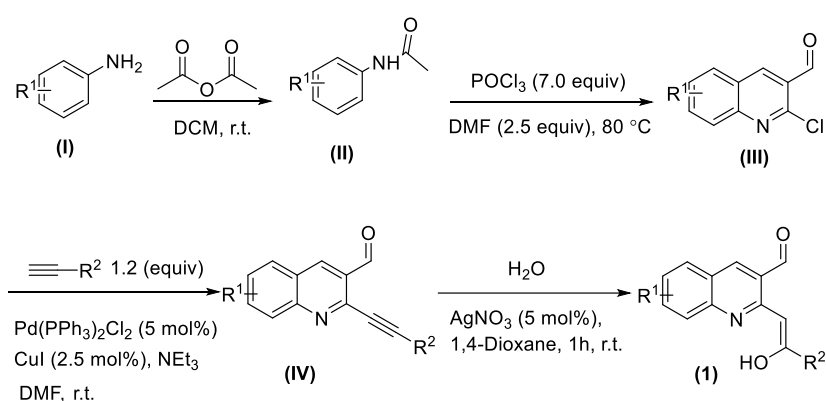

### 1.3. General Procedure for the Synthesis of N-allenyl Sulfonamides

This type of allenamides was synthesized the same as previously reported procedures:<sup>2</sup>

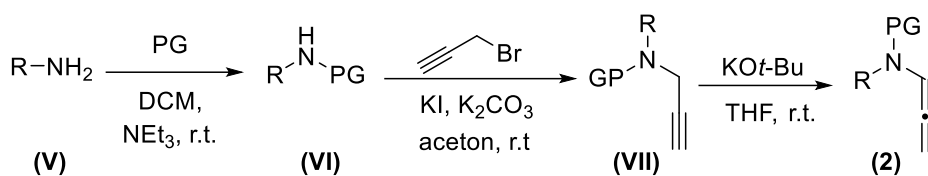

#### 1.4. General Procedure for the Synthesis of the Linear Homoallylic Quinolines

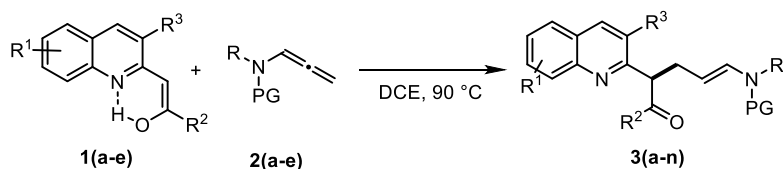

To a sealed tube (Schlenk tube), *N*-allenyl sulfonamides (0.22 mmol, 1.1 equiv.) was added in a solution of (*Z*)-2-(2-hydroxy-2-alkynyl)quinoline-3-carbaldehyde (0.2 mmol, 1.0 equiv.) in 2 mL DCE. The reaction mixture was heated at 90 °C for 48 h in an oil bath. The mixture was cooled down to room temperature and the solvent was removed under a vacuum. The residue was purified by column chromatography (silica gel), eluting with *n*-hexane and ethyl acetate (5:1) to afford the corresponding linear homoallylic quinolines structures.

#### 1.5. Procedure for the Synthesis of 3a on a Scale of 1 mmol

To a sealed tube (Schlenk tube), 4-Methyl-*N*-phenyl-*N*-(propa-1,2-dien-1-yl) benzene sulfonamide (2a) (314 mg, 1.1 mmol, 1.1 equiv.) was added in a solution of (*Z*)-2-(2-Hydroxy-2-phenylvinyl) quinoline-3-carbaldehyde (1a) (276 mg, 1.0 mmol, 1.0 equiv.) in 6 mL DCE. The reaction mixture was heated at 90 °C for 48 h in an oil bath. The mixture was cooled down to room temperature and the solvent was removed under vacuum. The residue was purified by column chromatography (silica gel), eluting with *n*-hexane and ethyl acetate (5:1) to afford the corresponding (*E*)-*N*-(4-(3-formylquinolin-2-yl)-5-oxo-5-phenylpent-1-en-1-yl)-4-methyl-*N*-phenylbenzenesulfonamide structures **3a** (Yield 82%).

## 2. Analysis of spectral data

### *(Z)*-2-(2-Hydroxy-2-phenylvinyl)quinoline-3-carbaldehyde (**1a**)

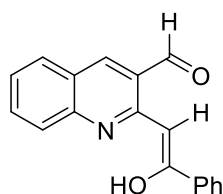

Red solid, (254 mg, Yield 89%, m.p. 155-157 °C), (*n*-hexane/EtOAc = 2:1,  $R_f = 0.33$ );  $^1\text{H}$  NMR (300 MHz,  $\text{CDCl}_3$ )  $\delta$  16.21 (*br s*, 1H, -OH), 9.97 (*s*, 1H, -CHO), 8.09 (*s*, 1H, H-4 quinoline), 8.01-7.99 (*m*, 1H, H-Ar), 7.64-7.53 (*m*, 3H, H-Ar), 7.47-7.42 (*m*, 3H, H-Ar), 7.38 (*d*,  $J = 7$  Hz, 1H, H-Ar), 7.37 (*s*, 1H, =CH), 7.22 (*td*,  $J = 8.1, 1.5$  Hz, 1H, H-Ar).  $^{13}\text{C}$  NMR (75 MHz,  $\text{CDCl}_3$ )  $\delta$  189.5, 185.3, 150.6, 147.9, 147.8, 140.0, 139.1, 129.6, 128.4, 127.1, 126.9, 125.9, 124.0, 121.4, 118.3, 88.5; HRMS-ESI ( $m/z$ ):  $[\text{M}+\text{H}]^+$  calcd for  $\text{C}_{18}\text{H}_{14}\text{NO}_2$  276.1017; Found: 276.1012.

### *(Z)*-2-(2-Hydroxy-2-phenylvinyl)-6,7-dimethylquinoline-3-carbaldehyde (**1b**)

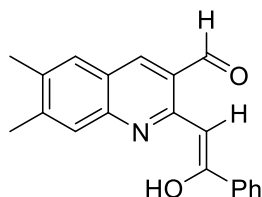

Red solid, (237 mg, Yield 78%, m.p. 172-174 °C), (*n*-hexane/EtOAc = 2:1,  $R_f = 0.35$ ),  $^1\text{H}$  NMR (300 MHz,  $\text{CDCl}_3$ )  $\delta$  16.35 (*br s*, 1H, -OH), 9.94 (*s*, 1H, -CHO), 8.04-7.97 (*m*, 3H, H-Ar), 7.49-7.43 (*m*, 3H, H-Ar), 7.34 (*br s*, 1H, H-Ar), 7.29 (*br s*, 1H, H-Ar), 7.20 (*br s*, 1H, =CH), 2.35 (*s*, 3H, Me), 2.27 (*s*, 3H, Me);  $^{13}\text{C}$  NMR (75 MHz,  $\text{CDCl}_3$ )  $\delta$  189.5, 184.1, 150.8, 147.3, 147.2, 145.9, 139.3, 138.7, 133.9, 130.6, 129.0, 128.3, 124.9, 120.1, 118.8, 88.0, 20.8, 19.4; HRMS-ESI ( $m/z$ ):  $[\text{M}+\text{H}]^+$  calcd for  $\text{C}_{20}\text{H}_{18}\text{NO}_2$  304.1332; Found: 304.1335.

### *(Z)*-2-(2-Hydroxy-2-phenylvinyl)-6-methylquinoline-3-carbaldehyde (**1c**)

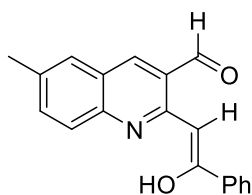

Red solid, (234 mg, Yield 81%, m.p. 163-165 °C), (*n*-hexane/EtOAc = 2:1,  $R_f = 0.31$ ),  $^1\text{H}$  NMR (300 MHz,  $\text{CDCl}_3$ )  $\delta$  16.43 (*br s*, 1H, -OH), 10.05 (*s*, 1H, -CHO), 8.13 (*s*, 1H, H-4 quinoline), 8.05-7.97 (*m*, 2H, H-Ar), 7.52-7.45 (*m*, 3H, H-Ar), 7.41-7.36 (*m*, 4H, H-Ar and =CH), 2.43 (*s*, 3H, Me).  $^{13}\text{C}$  NMR (75 MHz,  $\text{CDCl}_3$ )  $\delta$  189.6, 184.0, 151.0, 139.1, 138.6, 136.4, 134.2, 130.7, 128.8, 128.3, 126.9, 126.8, 125.9, 121.7, 118.7, 88.3, 21.0; HRMS-ESI ( $m/z$ ):  $[\text{M}+\text{H}]^+$  calcd for  $\text{C}_{19}\text{H}_{16}\text{NO}_2$  290.1181; Found: 290.1178.

**(Z)-2-(2-Hydroxy-2-(4-methoxyphenyl)vinyl)quinoline-3-carbaldehyde (1d)**

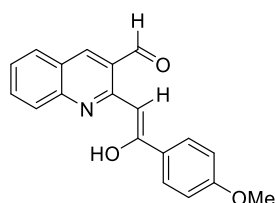

Red solid, (214 mg, Yield 70%, m.p. 97-100 °C), (*n*-hexane/EtOAc = 2:1,  $R_f = 0.37$ ),  $^1\text{H}$  NMR (300 MHz,  $\text{CDCl}_3$ )  $\delta$  16.10 (*br s*, 1H, -OH), 10.00 (*s*, 1H, -CHO), 8.15-8.06 (*m*, 2H, H-Ar), 8.02-7.91 (*m*, 4H, H-Ar), 7.62-7.52 (*m*, 3H, H-Ar), 7.37 (*br s*, 1H, =CH), 3.87 (*s*, 3H, -OMe);  $^{13}\text{C}$  NMR (75 MHz,  $\text{CDCl}_3$ )  $\delta$  189.4, 185.7, 162.0, 150.0, 149.0, 148.1, 148.0, 140.0, 132.0, 126.1, 123.7, 121.1, 117.9, 113.7, 113.5, 87.8, 55.3; HRMS-ESI ( $m/z$ ):  $[\text{M}+\text{H}]^+$  calcd for  $\text{C}_{19}\text{H}_{16}\text{NO}_3$  306.1127; Found: 306.1121.

**(Z)-2-(3-(Dimethoxymethyl)quinolin-2-yl)-1-phenylethen-1-ol (1e)**

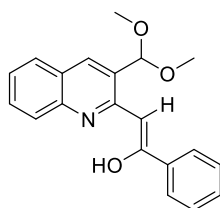

Yellow oil, (173 mg, Yield 54%), (*n*-hexane/EtOAc = 2:1,  $R_f = 0.41$ ),  $^1\text{H}$ -NMR (400 MHz,  $\text{CDCl}_3$ )  $\delta$  16.57 (*s*, 1H, -OH), 8.07 (*s*, 1H, H-4 quinoline), 8.02 – 8.00 (*m*, 2H, H-Ar), 7.61 (*d*,  $J = 6.8$  Hz, 1H, H-Ar), 7.58 (*d*,  $J = 6.8$  Hz, 1H, H-Ar), 7.56 (*d*,  $J = 6.6$  Hz, 1H, H-Ar), 7.53 (*d*,  $J = 6.6$  Hz, 1H, H-Ar), 7.49 – 7.47 (*m*, 3H, H-Ar), 6.42 (*s*, 1H, =CH), 5.51 (*s*, 1H, -CH(OMe)<sub>2</sub>), 3.42 (*s*, 6H, -OCH<sub>3</sub>).  $^{13}\text{C}$  NMR (101 MHz,  $\text{CDCl}_3$ )  $\delta$  184.2, 152.5, 140.1, 137.7, 135.2, 131.4, 130.4, 128.3, 128.2, 127.4, 126.8, 123.8, 122.3, 117.9, 98.7, 86.6, 52.6; HRMS-ESI ( $m/z$ ):  $[\text{M}+\text{H}]^+$  calcd for  $\text{C}_{20}\text{H}_{20}\text{NO}_3$  322.1431; Found: 322.1434.

**4-Methyl-N-phenyl-N-(propa-1,2-dien-1-yl)benzenesulfonamide (2a)**

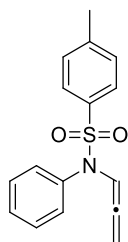

Yellow solid, (265 mg, Yield 93%, m.p. 74-76 °C), (*n*-hexane/EtOAc = 6:1,  $R_f$  = 0.33),  $^1\text{H}$  NMR (300 MHz,  $\text{CDCl}_3$ )  $\delta$  7.58 (d,  $J$  = 7.2 Hz, 2H, H-Ar), 7.34-7.28 (m, 5H, H-Ar), 7.14 (t,  $J$  = 6.3 Hz, 1H, N=CH), 7.04-7.01 (m, 2H, H-Ar), 5.05 (d,  $J$  = 6.3 Hz, 2H, =CH<sub>2</sub>), 2.46 (s, 3H, Me);  $^{13}\text{C}$  NMR (75 MHz,  $\text{CDCl}_3$ )  $\delta$  201.02, 144.0, 137.2, 135.2, 129.6, 129.5, 128.8, 128.7, 127.7, 102.4, 87.5, 21.6. HRMS-ESI ( $m/z$ ):  $[\text{M}+\text{H}]^+$  calcd for  $\text{C}_{16}\text{H}_{16}\text{NO}_2\text{S}$  286.0890 ; Found: 286.0891.

***N*-Benzyl-4-methyl-*N*-(propa-1,2-dien-1-yl)benzenesulfonamide (2b)**

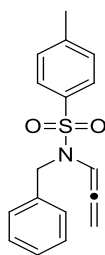

Yellow solid, (222 mg, Yield 74%, m.p. 78-80 °C), (*n*-hexane/EtOAc = 6:1,  $R_f$  = 0.38),  $^1\text{H}$  NMR (300 MHz,  $\text{CDCl}_3$ )  $\delta$  7.58 (d,  $J$  = 7.2 Hz, 2H, H-Ar), 7.36-7.25 (m, 7H, H-Ar), 6.84 (t,  $J$  = 6.2 Hz, 1H, =CH), 5.15 (d,  $J$  = 6.2 Hz, 2H, =CH<sub>2</sub>), 4.31 (s, 2H, -CH<sub>2</sub>), 2.46 (s, 3H, Me);  $^{13}\text{C}$  NMR (75 MHz,  $\text{CDCl}_3$ )  $\delta$  202.1, 143.8, 136.1, 135.2, 129.7, 128.3, 127.8, 127.4, 127.2, 100.0, 88.0, 50.0, 21.6. HRMS-ESI ( $m/z$ ):  $[\text{M}+\text{H}]^+$  calcd for  $\text{C}_{17}\text{H}_{18}\text{NO}_2\text{S}$  300.1057; Found: 300.1058.

***N*-(4-Chlorophenyl)-4-methyl-*N*-(propa-1,2-dien-1-yl)benzenesulfonamide (2c)**

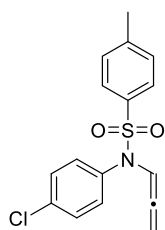

Yellow solid, (179 mg, Yield 56%, m.p. 111-113 °C), (*n*-hexane/EtOAc = 6:1,  $R_f$  = 0.31),  $^1\text{H}$  NMR (300 MHz,  $\text{CDCl}_3$ )  $\delta$  7.58 (d,  $J$  = 7.5 Hz, 2H, H-Ar), 7.30-7.24 (m, 4H, H-Ar), 7.10 (t,  $J$  = 6.2 Hz, 1H, =CH), 6.93 (d,  $J$  = 7.5 Hz, 2H, Ar), 5.06 (d,  $J$  = 6.3 Hz, 2H, =CH<sub>2</sub>), 2.45 (s, 3H,

Me).  $^{13}\text{C}$  NMR (75 MHz,  $\text{CDCl}_3$ )  $\delta$  200.8, 144.2, 135.6, 134.9, 134.5, 130.8, 129.6, 129.0, 127.7, 102.3, 87.9, 21.6. HRMS-ESI ( $m/z$ ):  $[\text{M}+\text{H}]^+$  calcd for  $\text{C}_{16}\text{H}_{15}^{35}\text{ClNO}_2\text{S}$  320.0502; Found: 320.0506.

***N*-(3,4-Dimethylphenyl)-4-methyl-*N*-(propa-1,2-dien-1-yl)benzenesulfonamide (2d)**

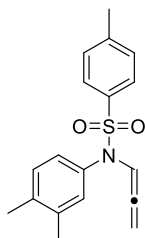

Yellow solid, (197 mg, Yield 63%, m.p. 108-110 °C), (*n*-hexane/EtOAc = 6:1,  $R_f$  = 0.38)  $^1\text{H}$  NMR (300 MHz,  $\text{CDCl}_3$ )  $\delta$  7.59 (d,  $J$  = 8.6 Hz, 2H, H-Ar), 7.28 (d,  $J$  = 8.6 Hz, 2H, H-Ar), 7.09 (t,  $J$  = 6.3 Hz, 1H, =CH), 7.01 (d,  $J$  = 8.1 Hz, 1H, H-Ar), 6.85 (s, 1H, H-Ar), 6.63 (dd,  $J$  = 8.0, 2.3 Hz, 1H, H-Ar), 5.03 (d,  $J$  = 6.3 Hz, 2H, =CH<sub>2</sub>), 2.45 (s, 3H, Me), 2.23 (s, 3H, Me), 2.19 (s, 3H, Me).  $^{13}\text{C}$  NMR (75 MHz,  $\text{CDCl}_3$ )  $\delta$  201.1, 143.7, 137.3, 137.2, 135.4, 134.6, 130.7, 130.5, 129.7, 129.6, 129.4, 102.4, 87.3, 21.6, 19.7, 19.5. HRMS-ESI ( $m/z$ ):  $[\text{M}+\text{H}]^+$  calcd for  $\text{C}_{18}\text{H}_{20}\text{NO}_2\text{S}$  314.1203; Found: 314.1205.

***N*-Phenyl-*N*-(propa-1,2-dien-1-yl)methanesulfonamide (2e)**

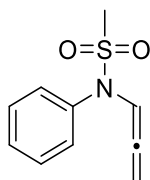

Yellow solid, (168 mg, Yield 80%, m.p. 65-67 °C), (*n*-hexane/EtOAc = 6:1,  $R_f$  = 0.35)  $^1\text{H}$ -NMR (400 MHz,  $\text{CDCl}_3$ )  $\delta$  7.43 (d,  $J$  = 8.4 Hz, 2H, H-Ar), 7.40 – 7.36 (m, 3H, H-Ar), 6.98 (t,  $J$  = 6.3 Hz, 1H, =CH), 5.17 (d,  $J$  = 6.3 Hz, 2H, =CH<sub>2</sub>), 3.04 (s, 3H, -CH<sub>3</sub>);  $^{13}\text{C}$  NMR (101 MHz,  $\text{CDCl}_3$ )  $\delta$  200.9, 137.3, 129.3, 129.2, 128.8, 101.9, 87.8, 38.2; HRMS-ESI ( $m/z$ ):  $[\text{M}+\text{H}]^+$  calcd for  $\text{C}_{10}\text{H}_{12}\text{NO}_2\text{S}$  210.0581; Found: 210.0584.

***(E)*-*N*-(4-(3-Formylquinolin-2-yl)-5-oxo-5-phenylpent-1-en-1-yl)-4-methyl-*N*-phenylbenzenesulfonamide (3a)**



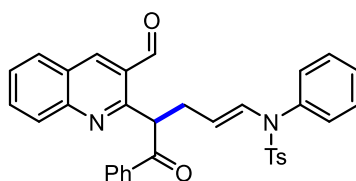

Orange solid, (100 mg, Yield 90%, m.p. 108-110 °C), (*n*-hexane/EtOAc = 4:1,  $R_f$  = 0.32)  $^1\text{H}$  NMR (300 MHz,  $\text{CDCl}_3$ )  $\delta$  10.17 (s, 1H, -CHO), 8.53 (*br s*, 1H, H-4 quinoline), 8.02 (d,  $J$  = 8.5 Hz, 1H, H-Ar), 7.92 (d,  $J$  = 8.1, 1H, H-Ar), 7.88-7.85 (m, 2H, H-Ar), 7.85-7.78 (m, 1H, H-Ar), 7.61 (td,  $J$  = 8.2, 1.4, 1H, H-Ar), 7.45-7.21 (m, 8H, H-Ar), 7.12 (d,  $J$  = 8.1, 2H, H-Ar), 6.92 (d,  $J$  = 14.0 Hz, 1H, =CH-N), 6.78-6.74 (m, 2H, H-Ar), 5.87 (t,  $J$  = 6.7 Hz, 1H,  $\text{C}(\text{sp}^3)\text{-H}$ ), 4.51-4.42 (m, 1H, =CH), 2.95-2.82 (m, 2H, - $\text{CH}_2$ ), 2.39 (s, 3H, Me).  $^{13}\text{C}$  NMR (75 MHz,  $\text{CDCl}_3$ )  $\delta$  198.2, 191.8, 157.7, 148.9, 145.6, 143.5, 137.1, 136.5, 135.7, 132.8, 132.4, 130.8, 130.7, 129.9, 129.7, 129.4, 129.3, 128.7, 128.6, 128.4, 127.5, 127.3, 127.1, 125.8, 109.5, 52.7, 31.9, 21.6. HRMS-ESI ( $m/z$ ):  $[\text{M}+\text{H}]^+$  calcd for  $\text{C}_{34}\text{H}_{28}\text{N}_2\text{O}_4\text{S}$  561.1844; Found: 561.1847.

***(E)-N-Benzyl-N-(4-(3-formylquinolin-2-yl)-5-oxo-5-phenylpent-1-en-1-yl)-4-methylbenzenesulfonamide (3b)***

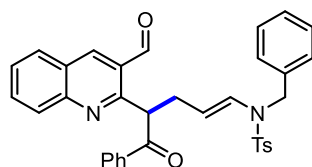

Orange solid, (93 mg, Yield 81%, m.p. 73-75 °C), (*n*-hexane/EtOAc = 4:1,  $R_f$  = 0.39),  $^1\text{H}$  NMR (300 MHz,  $\text{CDCl}_3$ )  $\delta$  9.94 (s, 1H, -CHO), 8.41 (s, 1H, H-4 quinoline), 8.01 (dd,  $J$  = 8.1, 1.4 Hz, 1H, H-Ar), 7.92 (dd,  $J$  = 8.1, 1.4 Hz, 1H, H-Ar), 7.90-7.78 (m, 3H, H-Ar), 7.61 (dd,  $J$  = 8.2, 1.4, 1H, H-Ar), 7.58-7.53 (m, 2H, H-Ar), 7.44 (tt,  $J$  = 8.3, 2.1 Hz, 1H, H-Ar), 7.38-7.30 (m, 2H, H-Ar), 7.18-7.10 (m, 7H, H-Ar), 6.67 (d,  $J$  = 14.0, 1H, =CH-N), 5.84 (dd,  $J$  = 7.9, 5.8 Hz, 1H,  $\text{C}(\text{sp}^3)\text{-H}$ ), 4.81-4.79 (m, 1H, =CH), 4.33 (d,  $J$  = 8.7 Hz, 2H, N- $\text{CH}_2$ ), 2.92-2.77 (m, 2H, - $\text{CH}_2$ ), 2.38 (s, 3H, Me).  $^{13}\text{C}$  NMR (75 MHz,  $\text{CDCl}_3$ )  $\delta$  198.3, 192.0, 157.3, 148.9, 146.0, 143.5, 137.0, 135.7, 135.6, 132.8, 132.7, 132.5, 129.7, 129.6, 128.6, 128.4, 128.3, 127.8, 127.7, 127.5, 127.2, 126.9, 126.8, 125.7, 110.5, 52.9, 49.3, 32.2, 21.5. HRMS-ESI ( $m/z$ ):  $[\text{M}+\text{H}]^+$  calcd for  $\text{C}_{35}\text{H}_{31}\text{N}_2\text{O}_4\text{S}$  575.1992; Found: 575.1996.

***(E)-N-(4-(3-Formyl-6,7-dimethylquinolin-2-yl)-5-oxo-5-phenylpent-1-en-1-yl)-4-methyl-N-phenylbenzenesulfonamide (3c)***

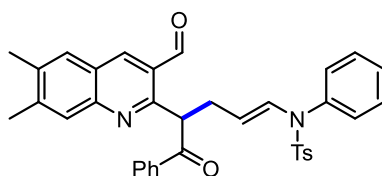

Orange solid, (90 mg, Yield 77%, m.p. 90-93 °C), (*n*-hexane/EtOAc = 4:1,  $R_f$  = 0.30),  $^1\text{H}$  NMR (300 MHz,  $\text{CDCl}_3$ )  $\delta$  10.15 (s, 1H, -CHO), 8.42 (s, 1H, H-4 quinoline), 7.85 (d,  $J$  = 8.2 Hz, 2H, H-Ar), 7.82 (br s, 1H, H-Ar), 7.67 (br s, 1H, H-Ar), 7.43-7.39 (m, 3H, H-Ar), 7.34-7.30 (m, 3H, H-Ar), 7.27-7.24 (m, 2H, H-Ar), 7.13 (d,  $J$  = 8.2, 2H, H-Ar), 6.89 (d,  $J$  = 13.9 Hz, 1H, =CH-N), 6.75 (d,  $J$  = 8.2 Hz, 2H, H-Ar), 5.86 (t,  $J$  = 6.7 Hz, 1H, -C(sp<sup>3</sup>)-H), 4.50-4.42 (m, 1H, =CH), 2.95-2.76 (m, 2H, -CH<sub>2</sub>), 2.48 (s, 6H, Me), 2.42 (s, 3H, Me);  $^{13}\text{C}$  NMR (75 MHz,  $\text{CDCl}_3$ )  $\delta$  198.2, 191.8, 157.0, 144.5, 144.0, 143.5, 137.8, 137.2, 136.6, 135.8, 132.3, 130.6, 130.0, 129.6, 129.4, 129.3, 129.2, 128.8, 128.5, 128.4, 127.7, 127.4, 127.3, 121.7, 109.7, 52.5, 32.2, 21.6, 20.7, 20.0. HRMS-ESI ( $m/z$ ):  $[\text{M}+\text{H}]^+$  calcd for  $\text{C}_{36}\text{H}_{33}\text{N}_2\text{O}_4\text{S}$  589.2150; Found: 589.2155.

***(E)*-N-(4-(3-Formyl-6-methylquinolin-2-yl)-5-oxo-5-phenylpent-1-en-1-yl)-4-methyl-N-phenylbenzenesulfonamide (3d)**

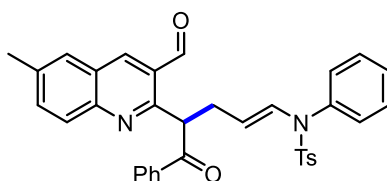

Orange solid, (85 mg, Yield 74%, m.p. 68-70 °C), (*n*-hexane/EtOAc = 4:1,  $R_f$  = 0.35),  $^1\text{H}$  NMR (400 MHz,  $\text{CDCl}_3$ )  $\delta$  10.17 (s, 1H, -CHO), 8.45 (s, 1H, H-4 quinoline), 7.94 (d,  $J$  = 8.6 Hz, 1H, H-Ar), 7.87 (d,  $J$  = 8.6 Hz, 2H, H-Ar), 7.70 (br s, 1H, H-Ar), 7.67 (dd,  $J$  = 8.6, 2.0 Hz, 1H, H-Ar), 7.43 (t,  $J$  = 7.8 Hz, 1H, H-Ar), 7.39 (d,  $J$  = 8.1 Hz, 2H, H-Ar), 7.36-7.30 (m, 3H, H-Ar), 7.28-7.24 (m, 2H, H-Ar), 7.12 (d,  $J$  = 8.1 Hz, 2H, H-Ar), 6.91 (d,  $J$  = 14 Hz, 1H, =CH-N), 6.76 (d,  $J$  = 7.0 Hz, 2H, H-Ar), 5.85 (t,  $J$  = 6.4 Hz, 1H, C(sp<sup>3</sup>)-H), 4.51-4.42 (m, 1H, =CH), 2.98-2.80 (m, 2H, -CH<sub>2</sub>), 2.58 (s, 3H, Me), 2.41 (s, 3H, Me);  $^{13}\text{C}$  NMR (101 MHz,  $\text{CDCl}_3$ )  $\delta$  198.3, 191.9, 156.8, 147.7, 144.9, 143.5, 137.7, 137.1, 136.6, 135.8, 135.2, 132.4, 130.7, 130.0, 129.4, 129.3, 128.8, 128.6, 128.5, 128.4, 127.4, 127.3, 127.1, 125.9, 109.6, 52.6, 32.0, 26.9, 21.6. HRMS-ESI ( $m/z$ ):  $[\text{M}+\text{H}]^+$  calcd for  $\text{C}_{35}\text{H}_{31}\text{N}_2\text{O}_4\text{S}$  575.1984; Found: 575.1990.

***(E)*-N-(4-(3-Formylquinolin-2-yl)-5-(4-methoxyphenyl)-5-oxopent-1-en-1-yl)-4-methyl-N-phenylbenzenesulfonamide (3e)**

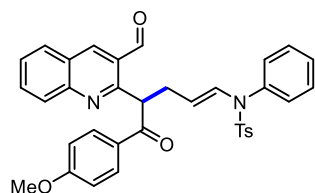

Orange solid, (85 mg, Yield 72%, m.p. 103-105 °C), (*n*-hexane/EtOAc = 4:1,  $R_f$  = 0.32),  $^1\text{H}$  NMR (400 MHz,  $\text{CDCl}_3$ )  $\delta$  10.19 (s, 1H, -CHO), 8.55 (s, 1H, H-4 quinoline), 8.07 (d,  $J$  = 8.2 Hz, 1H, H-Ar), 7.96 (d,  $J$  = 8.2 Hz, 1H, H-Ar), 7.88 (d,  $J$  = 8.3 Hz, 2H, H-Ar), 7.87 (t,  $J$  = 8.6 Hz, 1H, H-Ar), 7.64 (t,  $J$  = 8.6 Hz, 1H, H-Ar), 7.39 (d,  $J$  = 8.1 Hz, 1H, H-Ar), 7.32-7.23 (m, 3H, H-Ar), 7.12 (d,  $J$  = 8.1 Hz, 2H, H-Ar), 6.91 (d,  $J$  = 14.0 Hz, 1H, =CH-N), 6.82 (d,  $J$  = 7.9 Hz, 2H, H-Ar), 6.76 (d,  $J$  = 8.1 Hz, 2H, H-Ar), 5.82 (t,  $J$  = 7.6 Hz, 1H,  $\text{C}(\text{sp}^3)\text{-H}$ ), 4.50-4.42 (m, 1H, =CH<sub>2</sub>), 3.81 (s, 3H, -OMe), 2.98-2.84 (m, 2H, -CH<sub>2</sub>), 2.42 (s, 3H, Me).  $^{13}\text{C}$  NMR (101 MHz,  $\text{CDCl}_3$ )  $\delta$  196.8, 191.7, 163.0, 157.9, 149.0, 145.3, 143.5, 136.6, 135.8, 132.8, 130.8, 130.7, 130.0, 129.8, 129.4, 129.3, 128.8, 128.7, 128.6, 127.5, 127.4, 127.2, 125.8, 113.7, 109.7, 55.4, 52.5, 32.1, 21.6. HRMS-ESI ( $m/z$ ):  $[\text{M}+\text{H}]^+$  calcd for  $\text{C}_{35}\text{H}_{31}\text{N}_2\text{O}_5\text{S}$  591.1944; Found: 591.1946.

***(E)-N-Benzyl-N-(4-(3-formyl-6-methylquinolin-2-yl)-5-oxo-5-phenylpent-1-en-1-yl)-4-methylbenzenesulfonamide (3f)***

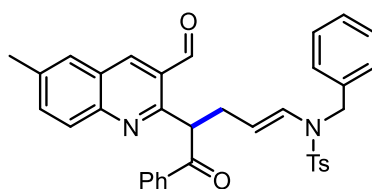

Orange solid, (94 mg, Yield 80%, m.p. 163-165 °C), (*n*-hexane/EtOAc = 4:1,  $R_f$  = 0.39),  $^1\text{H}$  NMR (400 MHz,  $\text{CDCl}_3$ )  $\delta$  9.92 (s, 1H, -CHO), 8.33 (s, 1H, H-4 quinoline), 7.92 (d,  $J$  = 8.5 Hz, 1H, H-Ar), 7.84 (d,  $J$  = 8.5 Hz, 2H, H-Ar), 7.69 (s, 1H, H-Ar), 7.66 (d,  $J$  = 8.3 Hz, 1H, H-Ar), 7.56 (d,  $J$  = 8.4 Hz, 2H, H-Ar), 7.44 (t,  $J$  = 7.4 Hz, 1H, H-Ar), 7.35 (d,  $J$  = 8.6 Hz, 1H, H-Ar), 7.32 (d,  $J$  = 8.4 Hz, 1H, H-Ar), 7.19-7.11 (m, 7H, H-Ar), 6.66 (d,  $J$  = 14.0 Hz, 1H, =CH-N), 5.83 (t,  $J$  = 8.0, 5.7 Hz, 1H,  $\text{C}(\text{sp}^3)\text{-H}$ ), 4.88-4.79 (m, 1H, =CH), 4.33 (s, 1H, -CH<sub>2</sub>-Ph), 4.32 (s, 1H, -CH<sub>2</sub>-Ph), 2.90-2.75 (m, 2H, -CH<sub>2</sub>), 2.58 (s, 3H, Me), 2.40 (s, 3H, Me).  $^{13}\text{C}$  NMR (101 MHz,  $\text{CDCl}_3$ )  $\delta$  198.4, 192.1, 156.4, 147.6, 145.3, 143.5, 137.7, 137.1, 135.8, 135.7, 135.1, 132.5, 129.7, 129.4, 128.5, 128.4, 128.3, 127.7, 127.3, 127.2, 127.0, 126.9, 126.8, 125.8, 110.5, 52.8, 49.3, 32.3, 21.6, 21.5. HRMS-ESI ( $m/z$ ):  $[\text{M}+\text{H}]^+$  calcd for  $\text{C}_{36}\text{H}_{33}\text{N}_2\text{O}_4\text{S}$  589.2153; Found: 589.2155.

**(E)-N-(4-Chlorophenyl)-N-(4-(3-formylquinolin-2-yl)-5-oxo-5-phenylpent-1-en-1-yl)-4-methylbenzenesulfonamide (3g)**

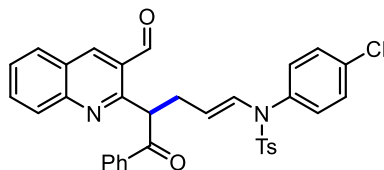

Orange solid, (78 mg, Yield 66%, m.p. 173-174 °C), (*n*-hexane/EtOAc = 4:1,  $R_f$  = 0.34),  $^1\text{H}$  NMR (300 MHz,  $\text{CDCl}_3$ )  $\delta$  10.19 (s, 1H, -CHO), 8.55 (s, 1H, H-4 quinoline), 8.01 (d,  $J$  = 8.5 Hz, 1H, H-Ar), 7.94 (d,  $J$  = 8.5 Hz, 1H, H-Ar), 7.90-7.80 (m, 3H, H-Ar), 7.62 (t,  $J$  = 8.1 Hz, 1H, H-Ar), 7.46-7.30 (m, 5H, H-Ar), 7.21 (d,  $J$  = 8.3 Hz, 2H, H-Ar), 7.13 (d,  $J$  = 8.3 Hz, 2H, H-Ar), 6.90 (d,  $J$  = 14.0 Hz, 1H, =CH-N), 6.71 (d,  $J$  = 8.6 Hz, 2H, H-Ar), 5.86 (t,  $J$  = 6.6 Hz, 1H,  $\text{C}(\text{sp}^3)\text{-H}$ ), 4.56-4.44 (m, 1H, =CH), 3.01-2.78 (m, 2H, - $\text{CH}_2$ ), 2.40 (s, 3H, Me).  $^{13}\text{C}$  NMR (75 MHz,  $\text{CDCl}_3$ )  $\delta$  198.2, 191.8, 157.6, 148.9, 145.8, 145.7, 143.8, 137.1, 135.4, 135.1, 134.7, 132.5, 131.3, 131.2, 130.6, 130.4, 129.6, 129.5, 129.4, 128.5, 128.3, 127.3, 127.0, 125.8, 110.1, 52.8, 31.8, 21.6. HRMS-ESI ( $m/z$ ):  $[\text{M}+\text{H}]^+$  calcd for  $\text{C}_{34}\text{H}_{28}^{35}\text{ClN}_2\text{O}_4\text{S}$  595.1452; Found: 595.1454.

**(E)-N-(4-Chlorophenyl)-N-(4-(3-formyl-6-methylquinolin-2-yl)-5-oxo-5-phenylpent-1-en-1-yl)-4-methylbenzenesulfonamide (3h)**

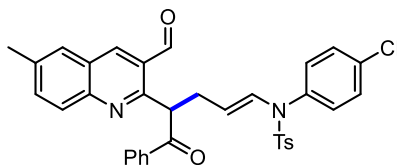

Orange solid, (95 mg, Yield 78%, m.p. 91-94 °C), (*n*-hexane/EtOAc = 4:1,  $R_f$  = 0.37),  $^1\text{H}$  NMR (300 MHz,  $\text{CDCl}_3$ )  $\delta$  10.16 (s, 1H, -CHO), 8.43 (s, 1H, H-4 quinoline), 7.95-7.88 (m, 3H, H-Ar), 7.86 (d,  $J$  = 8.6 Hz, 2H, H-Ar), 7.67 (br s, 1H, H-Ar), 7.55 (d,  $J$  = 8.3 Hz, 2H, H-Ar), 7.43-7.37 (m, 6H, H-Ar), 7.13 (d,  $J$  = 8.2 Hz, 2H, H-Ar), 6.90 (d,  $J$  = 14.0 Hz, 1H, =CH-N), 5.84 (t,  $J$  = 6.6 Hz, 1H,  $\text{C}(\text{sp}^3)\text{-H}$ ), 4.54-4.45 (m, 1H, =CH), 2.97-2.79 (m, 2H, - $\text{CH}_2$ ), 2.40 (s, 3H, Me), 2.26 (s, 3H, Me);  $^{13}\text{C}$  NMR (75 MHz,  $\text{CDCl}_3$ )  $\delta$  198.3, 192.0, 156.7, 153.4, 143.8, 143.5, 137.7, 137.1, 135.8, 135.6, 135.4, 135.2, 135.1, 135.0, 134.7, 129.6, 129.5, 129.4, 128.4, 128.1, 127.3, 126.9, 113.0, 112.2, 110.2, 52.7, 31.8, 22.7, 21.5. HRMS-ESI ( $m/z$ ):  $[\text{M}+\text{H}]^+$  calcd for  $\text{C}_{35}\text{H}_{30}^{35}\text{ClN}_2\text{O}_4\text{S}$  609.1604; Found: 609.1609.

**(E)-N-(3,4-Dimethylphenyl)-N-(4-(3-formylquinolin-2-yl)-5-oxo-5-phenylpent-1-en-1-yl)-4-**

**methylbenzenesulfonamide (3i)**

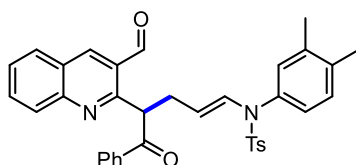

Orange solid, (90 mg, Yield 77%, m.p. 97-99 °C), (*n*-hexane/EtOAc = 4:1,  $R_f$  = 0.30),  $^1\text{H}$  NMR (300 MHz,  $\text{CDCl}_3$ )  $\delta$  10.17 (s, 1H, -CHO), 8.53 (s, 1H, H-4 quinoline), 8.03 (d,  $J$  = 8.0 Hz, 1H, H-Ar), 7.92 (d,  $J$  = 8.0 Hz, 1H, H-Ar), 7.90-7.79 (m, 5H, H-Ar), 7.60 (t,  $J$  = 6.9 Hz, 1H, H-Ar), 7.41 (d,  $J$  = 8.4 Hz, 2H, H-Ar), 7.33 (d,  $J$  = 8.1 Hz, 1H, H-Ar), 7.10 (d,  $J$  = 7.9 Hz, 1H, H-Ar), 6.96 (d,  $J$  = 14 Hz, 1H, =CH-N), 6.95 (br s, 1H, H-Ar), 6.62 (br s, 1H, H-Ar), 6.37 (dd,  $J$  = 8.0, 1.2 Hz, 1H, 1H, H-Ar), 5.87 (t,  $J$  = 6.6 Hz, 1H,  $\text{C}(\text{sp}^3)\text{-H}$ ), 4.52-4.42 (m, 1H, =CH), 2.95-2.84 (m, 2H, - $\text{CH}_2$ ), 2.39 (s, 3H, Me), 2.21 (s, 3H, Me), 2.13 (s, 3H, Me).  $^{13}\text{C}$  NMR (75 MHz,  $\text{CDCl}_3$ )  $\delta$  198.2, 191.8, 157.8, 149.0, 145.5, 145.4, 143.4, 137.8, 137.4, 137.1, 136.0, 134.0, 132.4, 131.0, 130.9, 130.3, 130.2, 129.9, 129.4, 129.3, 129.2, 128.4, 127.4, 127.1, 126.8, 125.8, 109.2, 52.8, 32.0, 21.6, 19.7, 19.5. HRMS-ESI ( $m/z$ ):  $[\text{M}+\text{H}]^+$  calcd for  $\text{C}_{36}\text{H}_{32}\text{N}_2\text{O}_4\text{S}$  589.2155; Found: 589.2158.

**(*E*)-*N*-(3,4-Dimethylphenyl)-*N*-(4-(3-formyl-6,7-dimethylquinolin-2-yl)-5-oxo-5-phenylpent-1-en-1-yl)-4-methylbenzenesulfonamide (3j)**

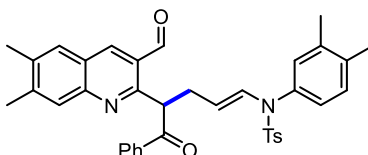

Orange solid, (74 mg, Yield 60%, m.p. 82-85°C), (*n*-hexane/EtOAc = 4:1,  $R_f$  = 0.33),  $^1\text{H}$  NMR (300 MHz,  $\text{CDCl}_3$ )  $\delta$  10.13 (s, 1H, -CHO), 8.39 (s, 1H, H-4 quinoline), 7.85 (d,  $J$  = 7.2 Hz, 1H, H-Ar), 7.79 (s, 1H, H-Ar), 7.63 (s, 1H, H-Ar), 7.43-7.40 (m, 3H, H-Ar), 7.30 (d,  $J$  = 8.0 Hz, 1H, H-Ar), 7.28 (d,  $J$  = 8.0 Hz, 1H, H-Ar), 7.14-7.08 (m, 3H, H-Ar), 6.97 (d,  $J$  = 8.0 Hz, 1H, H-Ar), 6.88 (d,  $J$  = 13.9 Hz, 1H, =CH-N), 6.62 (br s, 1H, H-Ar), 6.37 (dd,  $J$  = 8.0, 1.2 Hz, 1H, H-Ar), 5.85 (t,  $J$  = 6.9 Hz, 1H,  $\text{C}(\text{sp}^3)\text{-H}$ ), 4.49-4.42 (m, 1H, = $\text{CH}_2$ ), 2.95-2.76 (m, 2H, - $\text{CH}_2$ ), 2.45 (br s, 6H, Me), 2.40 (s, 3H, Me), 2.22 (s, 3H, Me), 2.14 (s, 3H, Me).  $^{13}\text{C}$  NMR (75 MHz,  $\text{CDCl}_3$ )  $\delta$  198.2, 191.7, 157.8, 149.0, 145.5, 145.4, 143.4, 137.8, 137.4, 137.1, 136.0, 134.0, 132.4, 131.0, 130.9, 130.3, 130.2, 129.4, 129.3, 129.2, 128.5, 128.4, 128.3, 127.4, 127.1, 125.8,

109.2, 52.8, 32.0, 21.6, 21.3, 19.7, 19.5, 18.8. HRMS-ESI ( $m/z$ ):  $[M+H]^+$  calcd for  $C_{38}H_{37}N_2O_4S$  617.2461; Found: 617.2468.

***(E)*-N-(4-(3-Formylquinolin-2-yl)-5-oxo-5-phenylpent-1-en-1-yl)-N-phenylmethanesulfonamide (3k)**

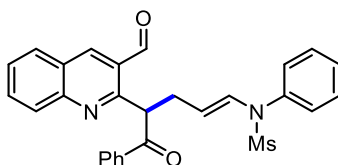

Orange solid, (68 mg, Yield 71%, m.p. 90-93 °C), (*n*-hexane/EtOAc = 4:1,  $R_f$  = 0.39),  $^1H$ -NMR (400 MHz,  $CDCl_3$ )  $\delta$  10.22 (s, 1H, CHO-), 8.59 (s, 1H, H-4 quinoline), 8.03 (d,  $J$  = 8.2, 1H, H-Ar), 7.96 (d,  $J$  = 8.2 Hz, 1H, H-Ar), 7.91 (d,  $J$  = 8.2 Hz, 2H, H-Ar), 7.82 (td,  $J$  = 8.4, 1.5 Hz, 1H, H-Ar), 7.62 (t,  $J$  = 7.6 Hz, 1H, H-Ar), 7.46 (t,  $J$  = 7.6 Hz, 1H, H-Ar), 7.41-7.34 (m, 5H, H-Ar), 7.16-7.12 (m, 2H, H-Ar), 6.73 (d,  $J$  = 14.1, 1H, =CH-N), 5.91 (t,  $J$  = 7.3 Hz, 1H, -CH-CH<sub>2</sub>), 4.66 – 4.59 (m, 1H, =CH-CH<sub>2</sub>), 3.00-2.82 (m, 2H, -CH<sub>2</sub>), 2.85 (s, 3H, -CH<sub>3</sub>);  $^{13}C$  NMR (101 MHz,  $CDCl_3$ )  $\delta$  198.4, 191.8, 157.8, 148.9, 145.6, 137.2, 136.6, 132.9, 132.5, 130.2, 129.8, 129.7, 129.6, 129.0, 128.7, 128.5, 128.4, 127.7, 125.8, 120.8, 109.6, 52.8, 38.7, 31.9; HRMS-ESI ( $m/z$ ):  $[M+H]^+$  calcd for  $C_{28}H_{25}N_2O_4S$  485.1524; Found: 485.1526.

***(E)*-N-(4-(3-Formyl-6,7-dimethylquinolin-2-yl)-5-oxo-5-phenylpent-1-en-1-yl)-N-phenylmethanesulfonamide (3l)**

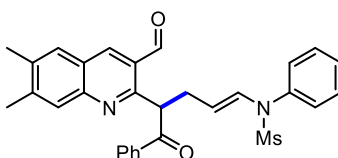

Orange solid, (66 mg, Yield 65%, m.p. 110-112 °C), (*n*-hexane/EtOAc = 4:1,  $R_f$  = 0.35),  $^1H$ -NMR (400 MHz,  $CDCl_3$ )  $\delta$  10.19 (s, 1H, -CHO), 8.45 (s, 1H, H-4 quinoline), 7.87 (d,  $J$  = 8.4 Hz, 1H, H-Ar), 7.78 (br s, 1H, H-Ar), 7.65 (br s, 1H, H-Ar), 7.45 – 7.37 (m, 4H, H-Ar), 7.36-7.28 (m, 3H, H-Ar), 7.18 – 7.07 (m, 2H, H-Ar), 6.71 (d,  $J$  = 14.0 Hz, 1H, =CH-N), 5.89 (t,  $J$  = 7.2 Hz, 1H, -CH-CH<sub>2</sub>), 4.66 – 4.58 (m, 1H, =CH-CH<sub>2</sub>), 3.08 – 2.94 (m, 1H, =CH-CH<sub>2</sub>), 2.85 (s, 3H, -SO<sub>2</sub>-CH<sub>3</sub>), 2.83 – 2.74 (m, 1H, =CH-CH<sub>2</sub>), 2.45 (s, 3H, -CH<sub>3</sub>), 2.46 (s, 3H, -CH<sub>3</sub>);  $^{13}C$  NMR (100 MHz,  $CDCl_3$ )  $\delta$  198.3, 191.9, 157.0, 148.2, 144.6, 144.1, 137.8, 137.2, 136.7, 132.4, 130.1, 129.8, 129.7, 129.0, 128.9, 128.4, 127.7, 126.4, 124.4, 120.8, 109.8, 52.6, 32.1, 22.7, 20.7, 19.9; HRMS-ESI ( $m/z$ ):  $[M+H]^+$  calcd for  $C_{30}H_{28}N_2O_4S$  513.1845; Found: 513.1848.

**(E)-N-(4-Chlorophenyl)-N-(4-(3-formyl-6-methylquinolin-2-yl)-5-(4-methoxyphenyl)-5-oxopent-1-en-1-yl)-4-methylbenzenesulfonamide (3m)**

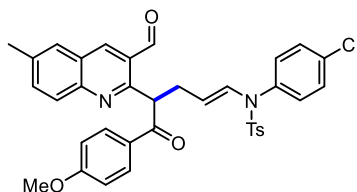

Orange oil, (89 mg, Yield 70%), (*n*-hexane/EtOAc = 4:1,  $R_f = 0.34$ ),  $^1\text{H-NMR}$  (400 MHz,  $\text{CDCl}_3$ )  $\delta$  10.47 (s, 1H, -CHO), 8.08 (s, 1H, H-4 quinoline), 7.68 (d,  $J = 8.0$  Hz, 1H, H-Ar), 7.61 (br s, 1H, H-Ar), 7.55 – 7.48 (m, 1H, H-Ar), 7.44 (d,  $J = 8.7$  Hz, 2H, H-Ar), 7.37 (d,  $J = 6.8$  Hz, 2H, H-Ar), 7.24 (d,  $J = 8.1$  Hz, 2H, H-Ar), 7.10 (d,  $J = 8.0$  Hz, 2H, H-Ar), 6.83 (d,  $J = 14.0$  Hz, 1H, =CH-N), 6.75 (d,  $J = 8.6$  Hz, 2H, H-Ar), 6.63 (d,  $J = 8.2$  Hz, 2H, H-Ar), 5.01 (d,  $J = 6.8$  Hz, 1H, -CH-CH<sub>2</sub>), 4.73 – 4.60 (m, 1H, =CH-CH<sub>2</sub>), 3.70 (s, 3H, O-CH<sub>3</sub>), 3.03 – 2.86 (m, 2H, =CH-CH<sub>2</sub>), 2.55 (s, 3H, -CH<sub>3</sub>), 2.40 (s, 3H, -CH<sub>3</sub>).  $^{13}\text{C NMR}$  (100 MHz,  $\text{CDCl}_3$ )  $\delta$  197.1, 189.4, 162.3, 155.6, 143.7, 136.6, 135.4, 135.2, 134.6, 132.3, 132.2, 131.9, 131.6, 131.3, 131.0, 130.5, 129.6, 129.5, 128.9, 128.5, 127.2, 126.5, 113.7, 113.2, 109.9, 57.5, 55.2, 38.4, 21.7, 21.6. HRMS-ESI ( $m/z$ ):  $[\text{M}+\text{H}]^+$  calcd for  $\text{C}_{36}\text{H}_{32}^{35}\text{ClN}_2\text{O}_5\text{S}$  639.1707; Found: 639.1711

**(E)-N-(4-(3-(Dimethoxymethyl)quinolin-2-yl)-5-oxo-5-phenylpent-1-en-1-yl)-4-methyl-N-phenylbenzenesulfonamide (3n)**

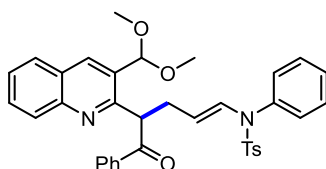

Yellow oil, (49 mg, Yield 41%), (*n*-hexane/EtOAc = 4:1,  $R_f = 0.30$ ),  $^1\text{H-NMR}$  (400 MHz,  $\text{CDCl}_3$ )  $\delta$  8.32 (s, 1H, H-4 quinoline), 7.95 (d,  $J = 8.1$  Hz, 1H, H-Ar), 7.83 (d,  $J = 8.6$  Hz, 2H, H-Ar), 7.69 (d,  $J = 8.6$  Hz, 1H, H-Ar), 7.52 (d,  $J = 8.6$  Hz, 1H), 7.43 – 7.33 (m, 7H, H-Ar), 7.43 – 7.20 (m, 6H, H-Ar), 7.05 (d,  $J = 14.0$  Hz, 1H, =CH-N), 6.78 (s, 1H, -CH-O), 5.29 (t,  $J = 6.7$  Hz, 1H, -CH-CH<sub>2</sub>), 4.53-4.46 (m, 1H, =CH-CH<sub>2</sub>), 3.38 (s, 3H, -O-CH<sub>3</sub>), 3.35 (s, 3H, -O-CH<sub>3</sub>), 2.57 – 2.43 (m, 2H, =CH-CH<sub>2</sub>), 2.39 (s, 3H, -CH<sub>3</sub>);  $^{13}\text{C NMR}$  (101 MHz,  $\text{CDCl}_3$ )  $\delta$  202.5, 157.5, 143.5, 137.3, 137.0, 136.6, 132.5, 132.3, 130.7, 129.9, 129.7, 129.4, 129.3, 128.7, 128.6, 128.5, 128.4, 128.3, 127.8, 127.7, 127.3, 126.2, 109.9, 101.9, 54.7, 54.2, 42.3, 32.1, 21.6. HRMS-ESI ( $m/z$ ):  $[\text{M}+\text{H}]^+$  calcd for  $\text{C}_{36}\text{H}_{35}\text{N}_2\text{O}_5\text{S}$  607.2255; Found: 607.2261.

**(E)-N-(4-(3-Formylquinolin-2-yl)-5-oxodec-1-en-1-yl)-4-methyl-N-phenylbenzene sulfonamideb (3o)**

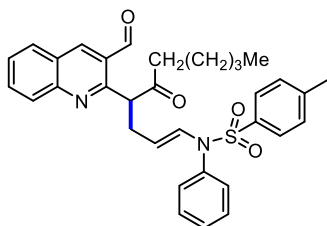

Orange oil, (62 mg, Yield 56%), (*n*-hexane/EtOAc = 4:1,  $R_f = 0.25$ ),  $^1\text{H-NMR}$  (400 MHz,  $\text{CDCl}_3$ )  $\delta$  10.17 (s, 1H, -CHO), 8.58 (s, 1H, H-4 quinoline), 8.09 (d,  $J = 8.4$  Hz, 1H, H-Ar), 7.98 (d,  $J = 8.1$  Hz, 1H, H-Ar), 7.88 (dd,  $J = 8.5, 4.5$  Hz, 1H, H-Ar), 7.68 (dd,  $J = 8.4, 4.6$  Hz, 1H, H-Ar), 7.37 (d,  $J = 8.4$  Hz, 2H, H-Ar), 7.31 – 7.24 (m, 3H, H-Ar), 7.11 (d,  $J = 8.5$  Hz, 2H, H-Ar), 6.90 (d,  $J = 14.0$  Hz, 1H, =CH-N), 6.76 (d,  $J = 8.3$  Hz, 2H, H-Ar), 4.93 (dd,  $J = 7.7, 5.9$  Hz, 1H, -CH-CH<sub>2</sub>), 4.41 – 4.34 (m, 1H, =CH-CH<sub>2</sub>), 2.88 – 2.74 (m, 2H, =CH-CH<sub>2</sub>), 2.41 (s, 3H, =C-CH<sub>3</sub>), 2.39-2.33 (m, 2H, -CO-CH<sub>2</sub>), 1.57 – 1.48 (m, 2H, -CH<sub>2</sub>), 1.33-1.12 (m, 4H, -CH<sub>2</sub>), 0.82 (t,  $J = 7.0$  Hz, 3H, -CH<sub>3</sub>);  $^{13}\text{C NMR}$  (101 MHz,  $\text{CDCl}_3$ )  $\delta$  208.1, 191.4, 157.6, 149.0, 144.7, 143.5, 136.6, 135.7, 132.9, 130.6, 129.9, 129.5, 129.4, 129.2, 128.9, 128.8, 127.6, 127.3, 125.9, 109.6, 92.9, 57.3, 42.0, 31.2, 31.1, 23.4, 22.5, 21.6, 13.9; HRMS-ESI ( $m/z$ ):  $[\text{M}+\text{H}]^+$  calcd for  $\text{C}_{33}\text{H}_{35}\text{N}_2\text{O}_4\text{S}$  555.2310 Found 555.2314.

**(E)-N-(3-(5-Hydroxy-7-phenyl-5H-pyrano[4,3-b]pyridin-8-yl)prop-1-en-1-yl)-4-methyl-N-phenylbenzenesulfonamide (3p)**

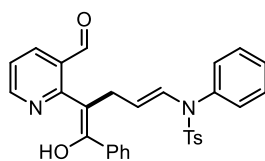

Orange solid, (54 mg, Yield 53%, m.p. 79-81 °C), (*n*-hexane/EtOAc = 3:1,  $R_f = 0.30$ ),  $^1\text{H NMR}$  (400 MHz, ,  $\text{DMSO-}d_6$ )  $\delta$  16.10 (*br s*, 1H, -OH), 9.36 (s, 1H, -CHO), 9.15 (dd,  $J = 4.3, 1.8$  Hz, 1H, H-4 quinoline), 8.60 (dd,  $J = 8.3, 1.8$  Hz, 1H, H-Ar), 7.73 (dd,  $J = 8.2, 4.3$  Hz, 1H, H-Ar), 7.52-7.44 (m, 5H, H-Ar), 7.38 – 7.31 (m, 7H, H-Ar), 6.82 – 6.75 (m, 2H, H-Ar), 6.61 (d,  $J = 14.1$  Hz, 1H, =CH-N), 4.53 (dt,  $J = 13.6, 6.5$  Hz, 1H, =CH), 3.85 (d,  $J = 7.6$  Hz, 2H, CH<sub>2</sub>), 2.39 (s, 3H, CH<sub>3</sub>);  $^{13}\text{C NMR}$  (101 MHz,  $\text{CDCl}_3$ )  $\delta$  187.6, 169.0, 155.8, 154.1, 150.6, 149.7, 143.67, 140.3, 136.7, 135.9, 135.8, 130.2, 130.0, 129.4, 129.1, 128.7, 128.2, 127.4, 122.3, 122.1, 111.5,



77.3, 27.8, 21.6; HRMS-ESI ( $m/z$ ):  $[M+H]^+$  calcd for  $C_{30}H_{27}N_2O_4S$  511.1683, Found: 511.1688.

***N*-Benzyl-*N*-((4*R*,5*S*,*E*)-5-hydroxy-4-(3-(hydroxymethyl)quinolin-2-yl)-5-phenylpent-1-en-1-yl)-4-methylbenzenesulfonamide (4a)**

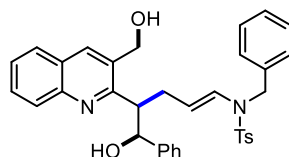

Yellow solid, (82 mg, Yield 72%, m.p. 123-124 °C), (*n*-hexane/EtOAc = 3:1,  $R_f$  = 0.25), (mixture of two diastereomers (50:50));  $^1H$  NMR (400 MHz, Chloroform-*d*)  $\delta$  7.87 – 7.74 (m, 5H), 7.67 (br s, 2H), 7.63 – 7.55 (m, 2H), 7.53-7.47 (m, 2H), 7.45-7.40 (m, 3H), 7.41-7.35 (m, 4H), 7.32-7.27 (m, 4H), 7.23-7.15 (m, 4H), 7.13-7.08 (m, 4H), 7.07-7.03 (m, 5H), 7.01-6.93 (m, 3H), 6.19 (t,  $J$  = 14.0 Hz, 2H), 4.95-4.88 (m, 1H), 4.81 (d,  $J$  = 14.0 Hz, 1H), 4.76 – 4.49 (m, 3H), 4.47 – 4.19 (m, 6H), 4.17-3.98 (m, 3H), 3.54 – 3.32 (m, 3H), 3.00 – 2.72 (m, 2H), 2.61-2.47 (m, 1H), 2.38 (d,  $J$  = 4.6 Hz, 6H), 2.37-2.30 (m, 2H);  $^{13}C$  NMR (101 MHz, Chloroform-*d*)  $\delta$  163.3, 163.6, 146.3, 144.1, 143.7, 143.6, 143.3, 142.4, 136.1, 135.9, 135.8, 135.7, 135.6, 135.5, 135.4, 135.3, 132.6, 132.3, 129.7, 129.6, 129.5, 128.7, 128.6, 128.5, 128.4, 128.3, 128.1, 128.0, 127.6, 127.5, 127.3, 127.2, 127.1, 127.0, 126.9, 126.8, 126.7, 126.6, 126.5, 126.4, 125.9, 125.6, 112.7, 111.8, 74.8, 62.4, 62.2, 50.1, 49.5, 49.0, 48.1, 29.7, 28.9, 22.7, 21.5; HRMS-ESI ( $m/z$ ):  $[M+H]^+$  calcd for  $C_{35}H_{35}N_2O_4S$  579.2861; Found: 579.2863

### 3. $^1\text{H}$ NMR, $^{13}\text{C}$ NMR, and HRMS-ESI Spectra

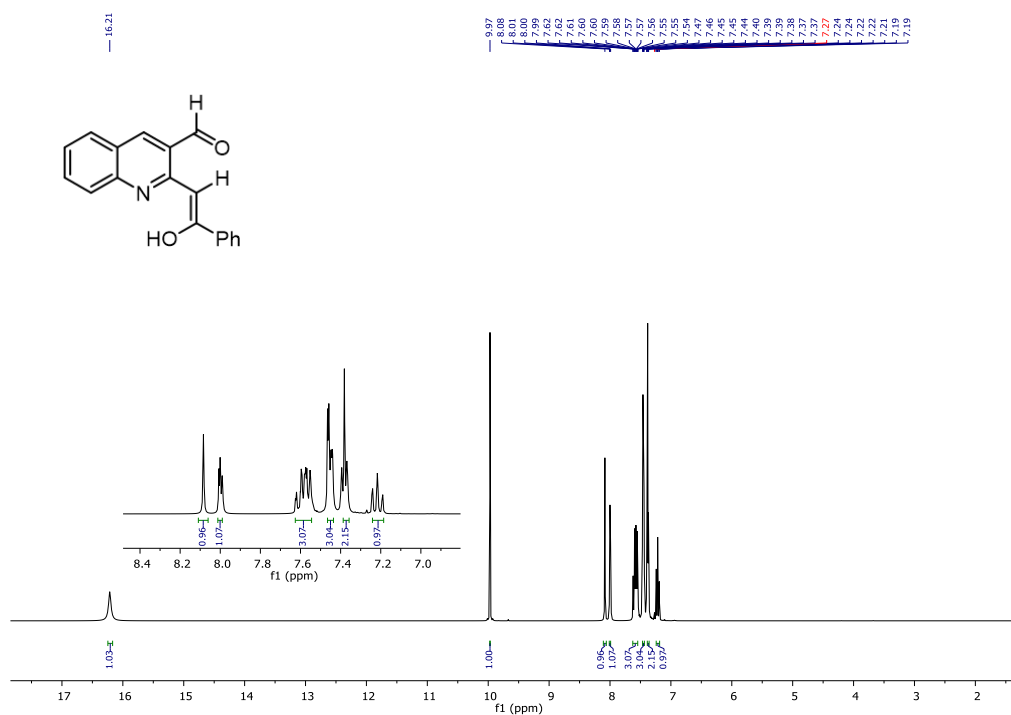

$^1\text{H}$ -NMR of compound **1a** (300 MHz,  $\text{CDCl}_3$ )

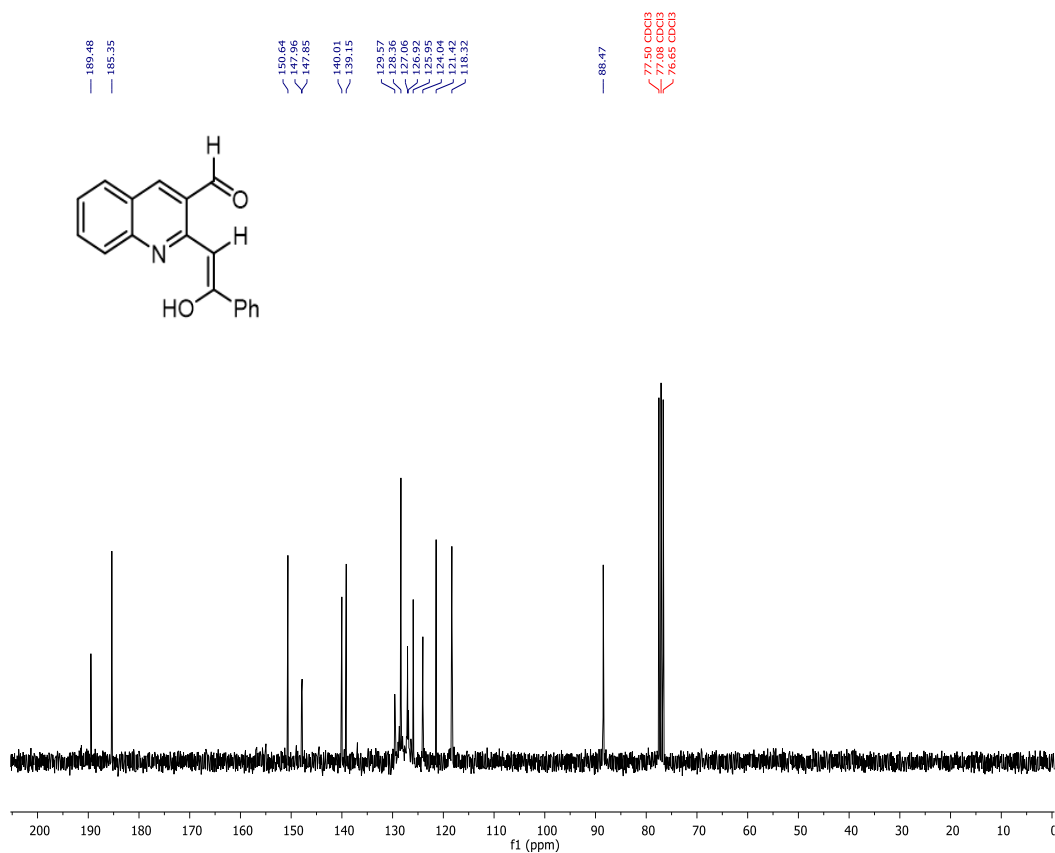

$^{13}\text{C}$ -NMR of compound **1a** (75 MHz,  $\text{CDCl}_3$ )

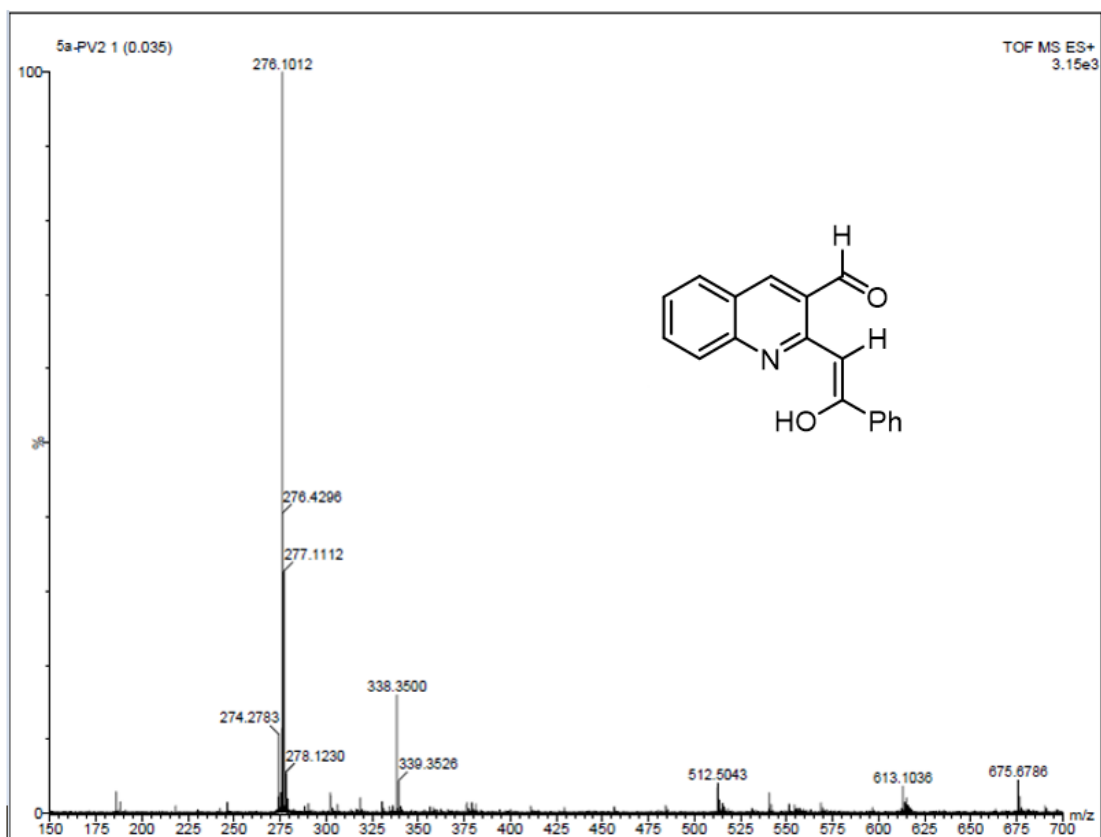

HRMS-ESI of **1a**:  $[M+H]^+$  calcd for  $C_{18}H_{14}NO_2$  276.1017

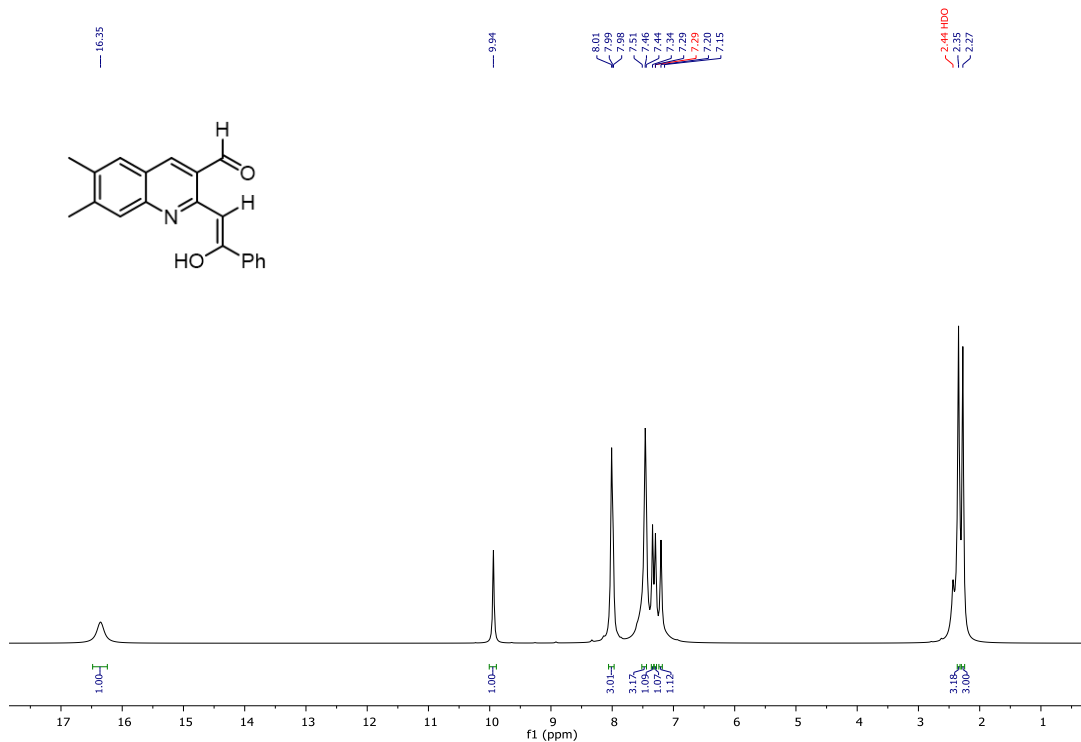

<sup>1</sup>H-NMR of compound **1b** (300MHz, CDCl<sub>3</sub>)

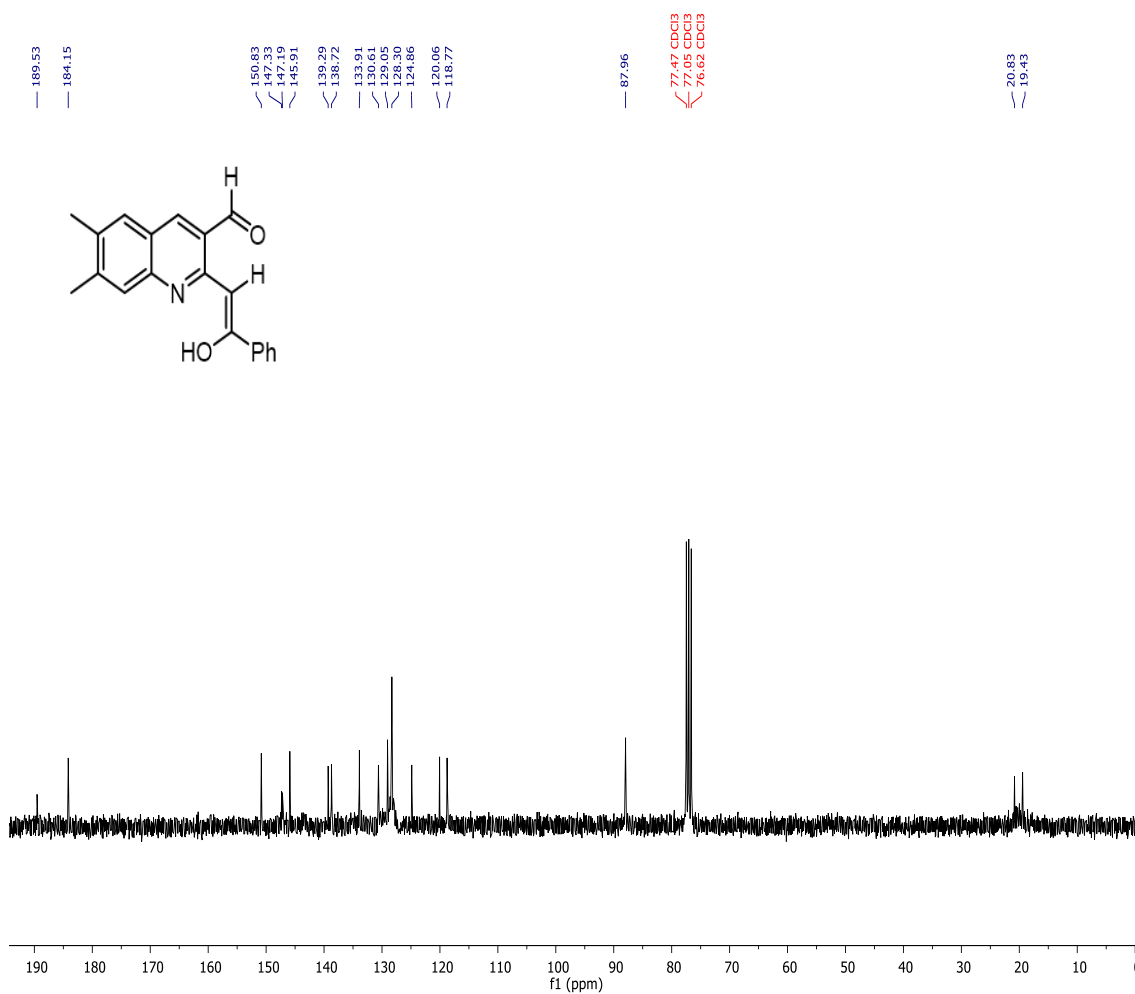

$^{13}\text{C}$ -NMR of compound **1b** (75 MHz,  $\text{CDCl}_3$ )

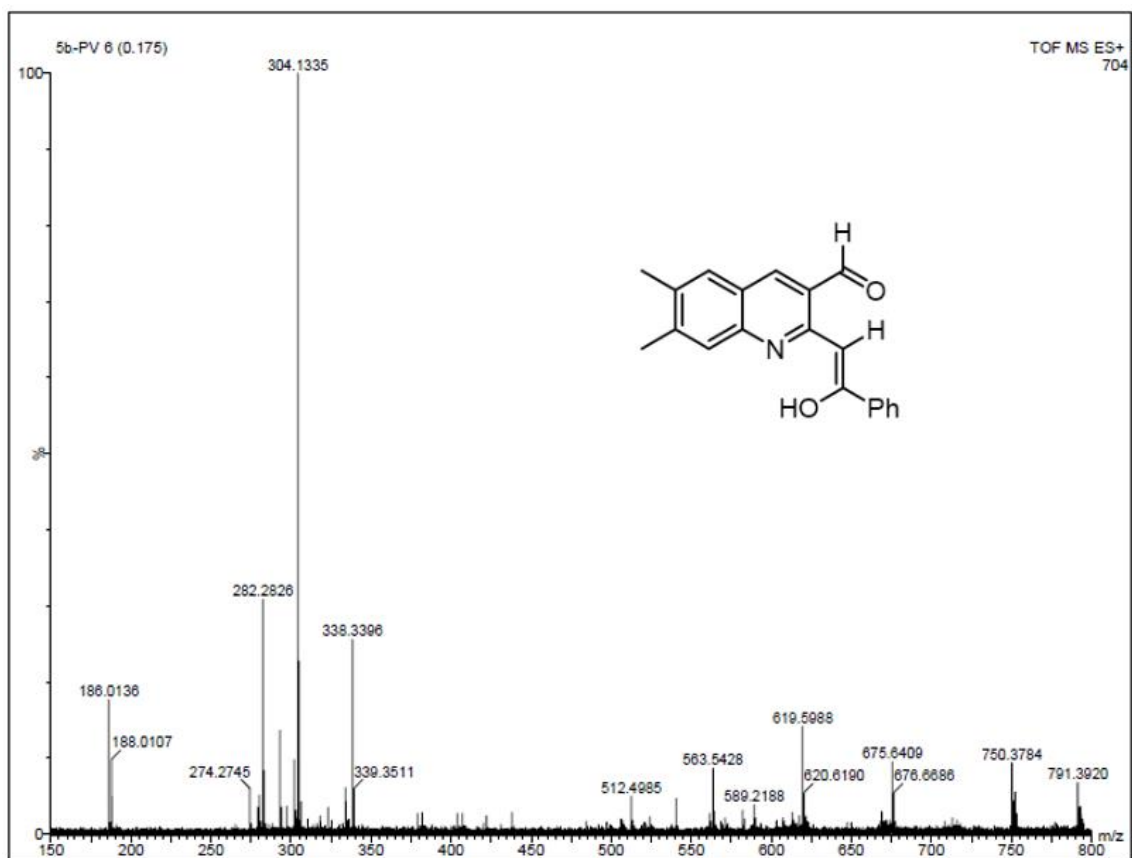

HRMS-ESI of **1b**:  $[\text{M}+\text{H}]^+$  calcd for  $\text{C}_{20}\text{H}_{18}\text{NO}_2$  304.1332

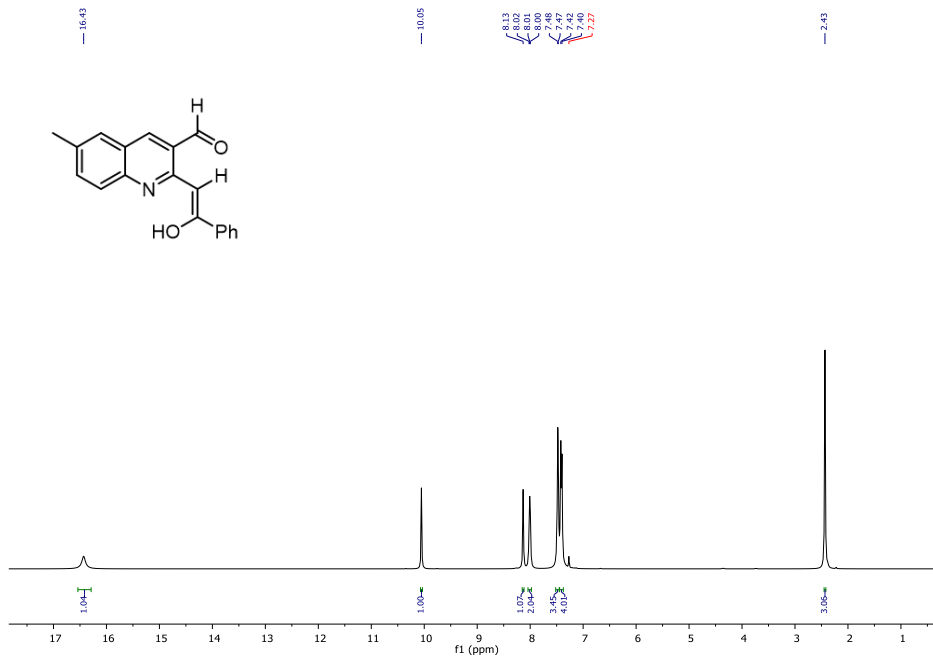

<sup>1</sup>H-NMR of compound **1c** (300MHz, CDCl<sub>3</sub>)

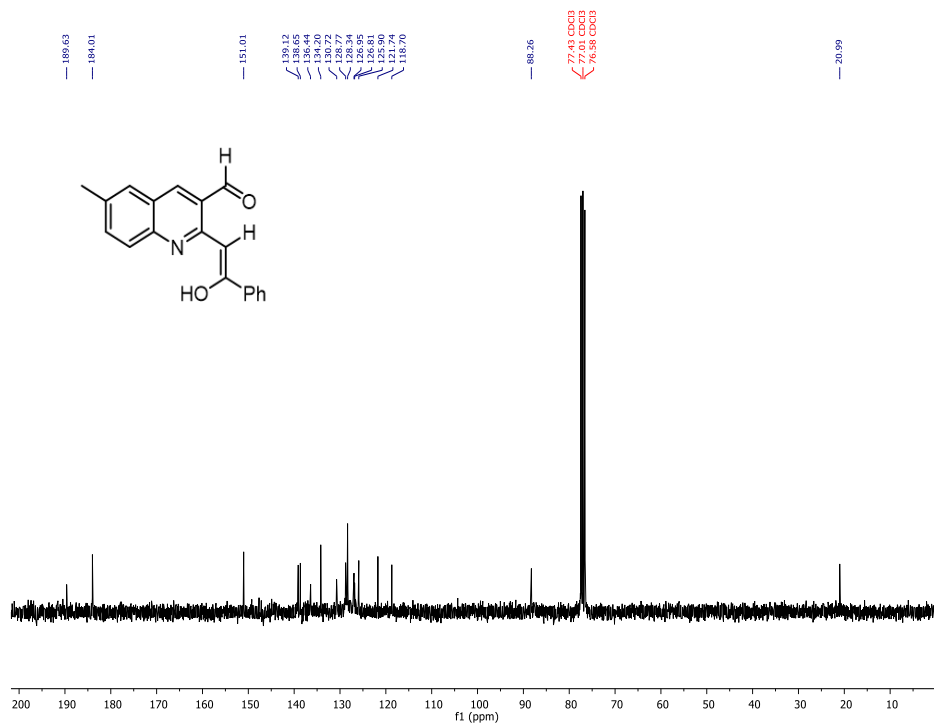

<sup>13</sup>C-NMR of compound **1c** (75 MHz, CDCl<sub>3</sub>)

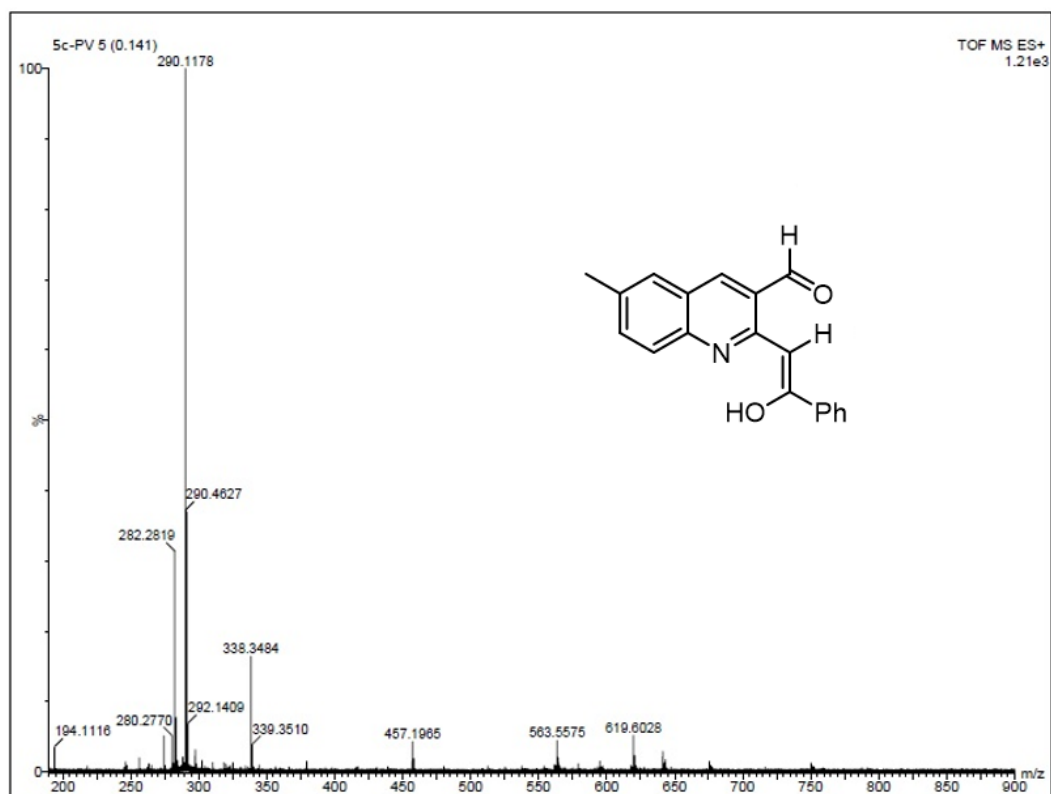

HRMS-ESI of **1c**:  $[M+H]^+$  calcd for  $C_{19}H_{16}NO_2$  290.1181

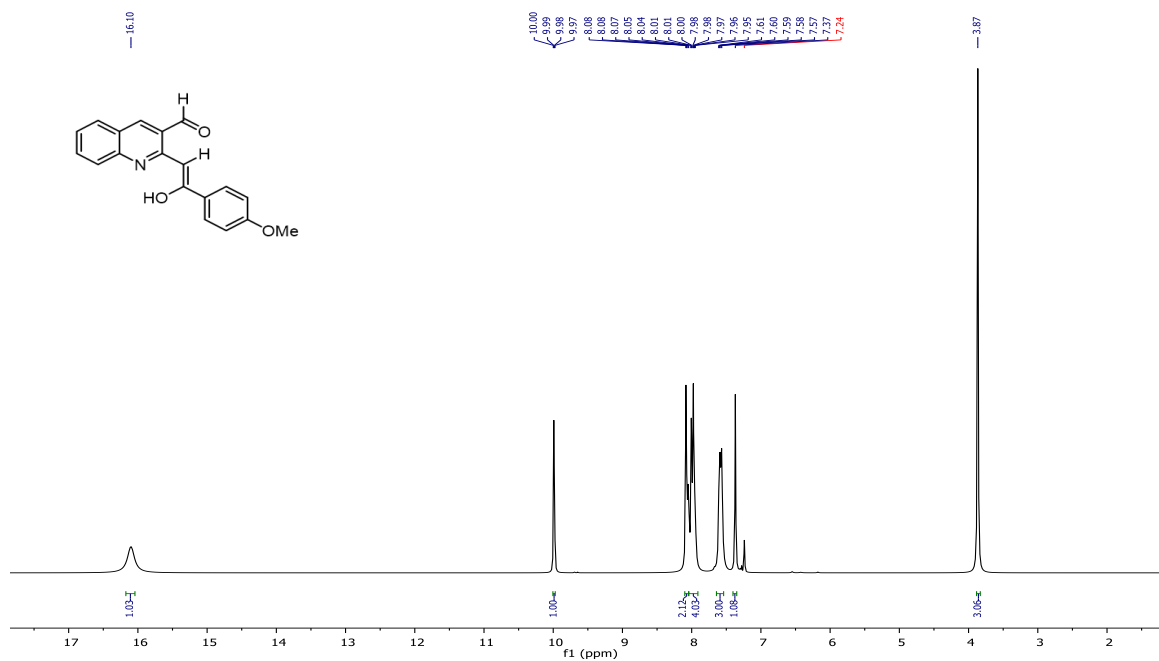

<sup>1</sup>H-NMR of compound **1d** (300MHz, CDCl<sub>3</sub>)

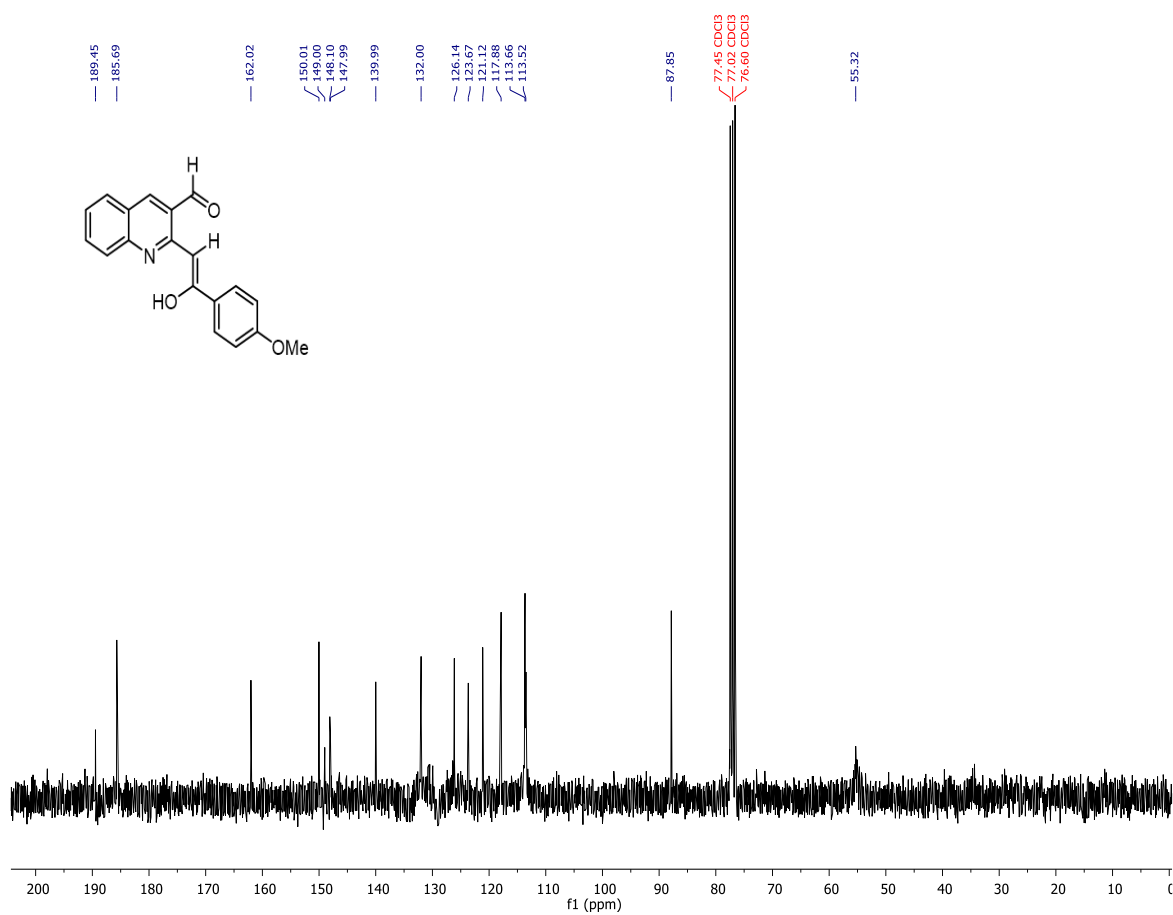

<sup>13</sup>C-NMR of compound **1d** (75 MHz, CDCl<sub>3</sub>)



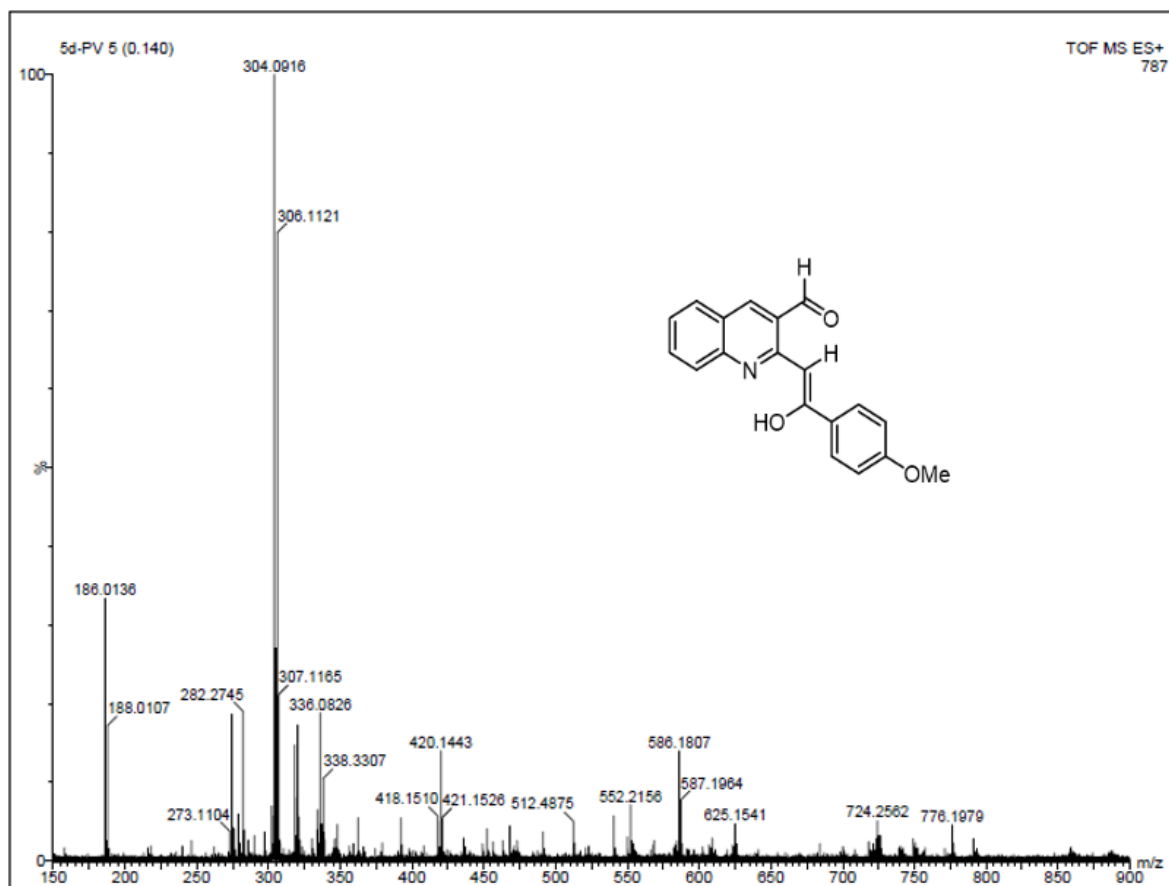

HRMS-ESI of **1d**:  $[M+H]^+$  calcd for  $C_{19}H_{16}NO_3$  306.1127

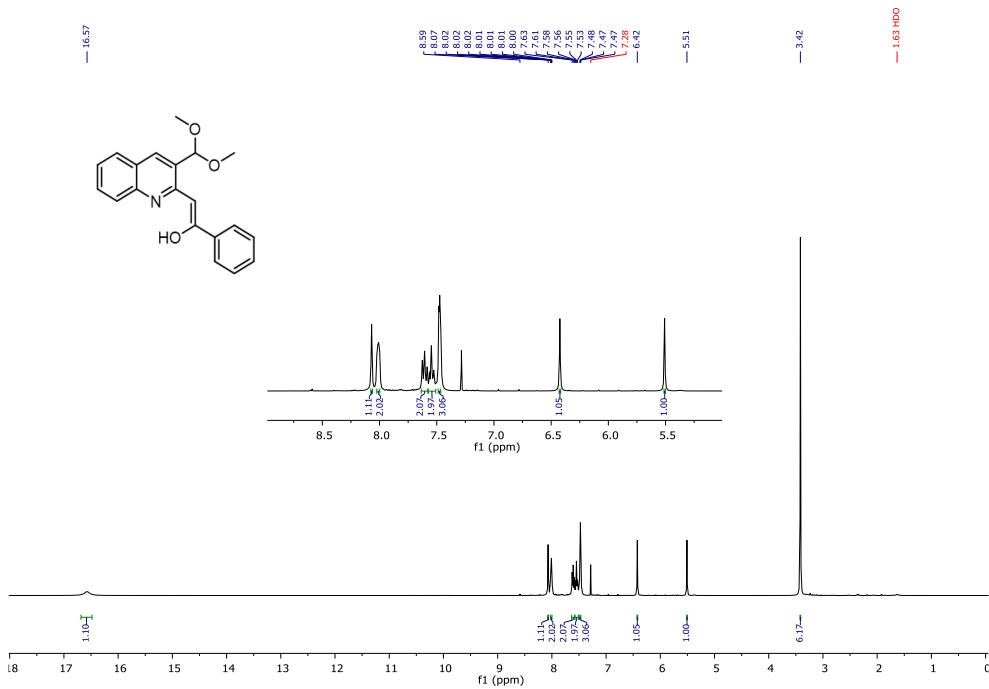

$^1\text{H-NMR}$  of compound **1e** (400MHz,  $\text{CDCl}_3$ )

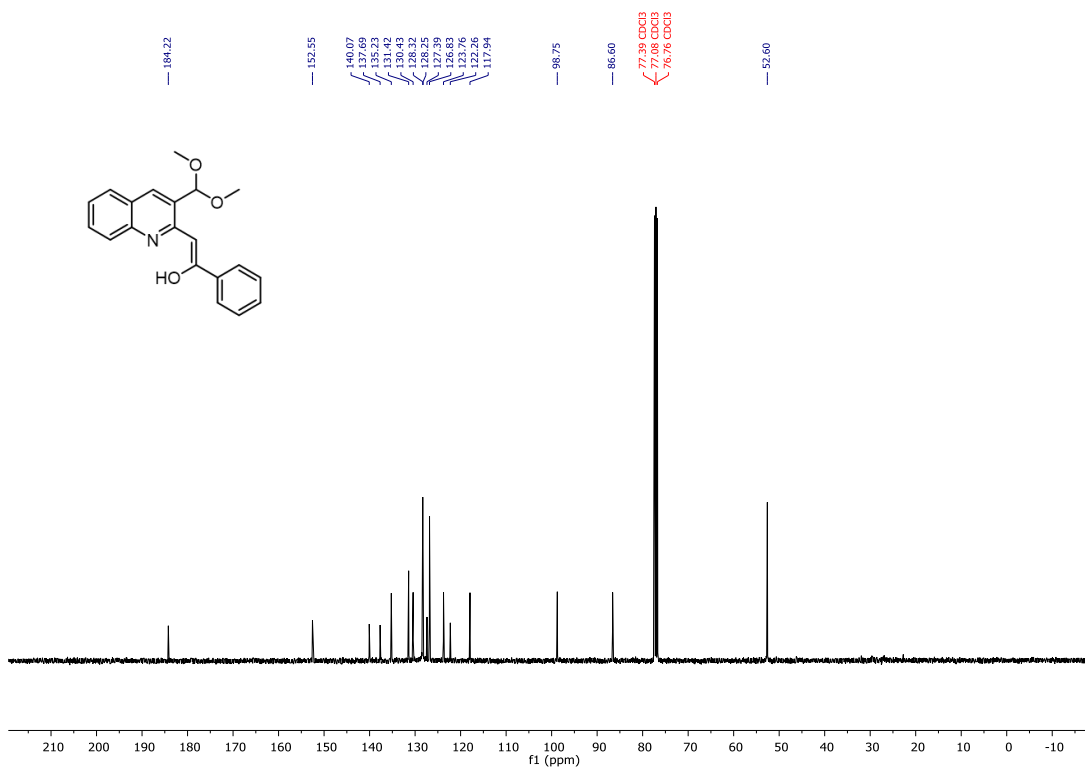

$^{13}\text{C-NMR}$  of compound **1e** (101 MHz,  $\text{CDCl}_3$ )

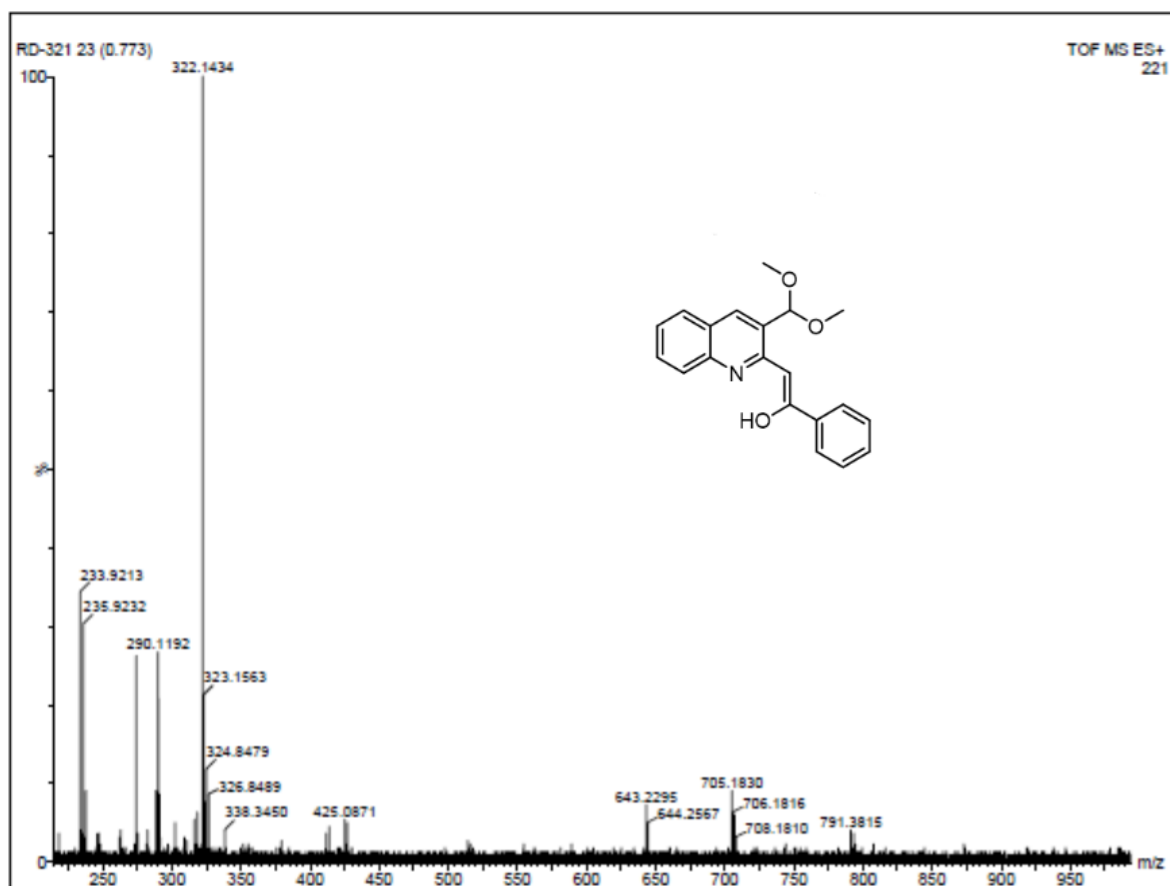

HRMS-ESI of **1e** :  $[M+H]^+$  calcd for  $C_{20}H_{20}NO_3$  322.1431

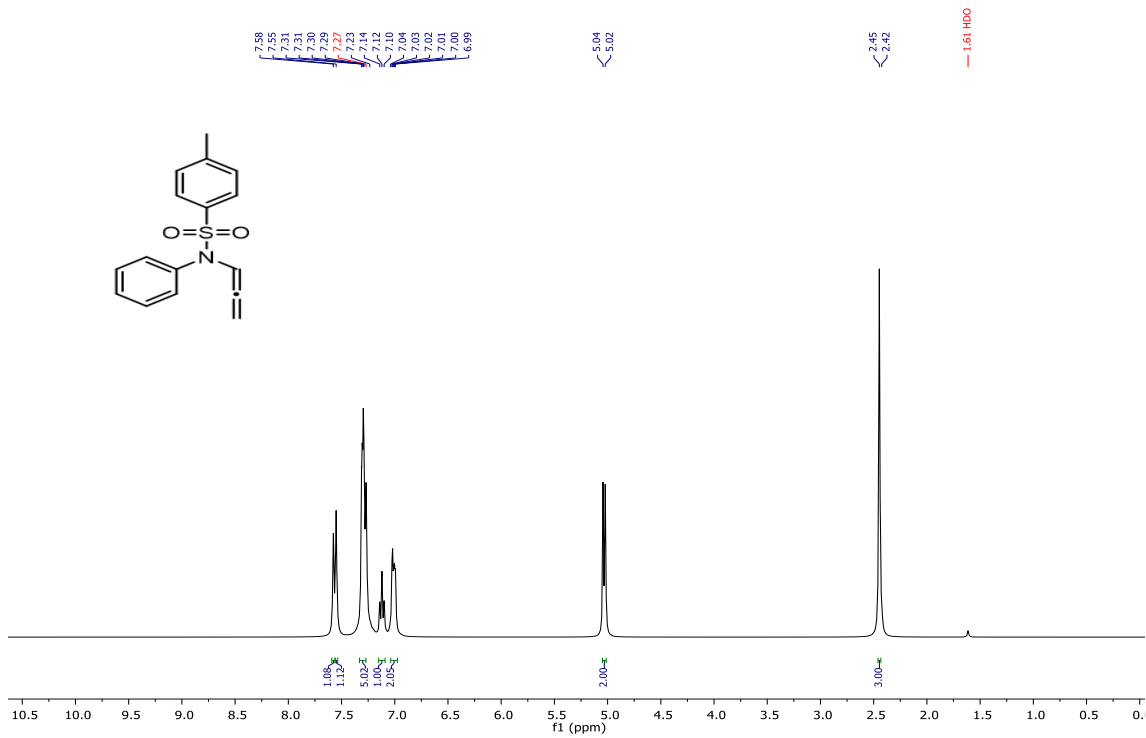

<sup>1</sup>H-NMR of compound **2a** (300MHz, CDCl<sub>3</sub>)

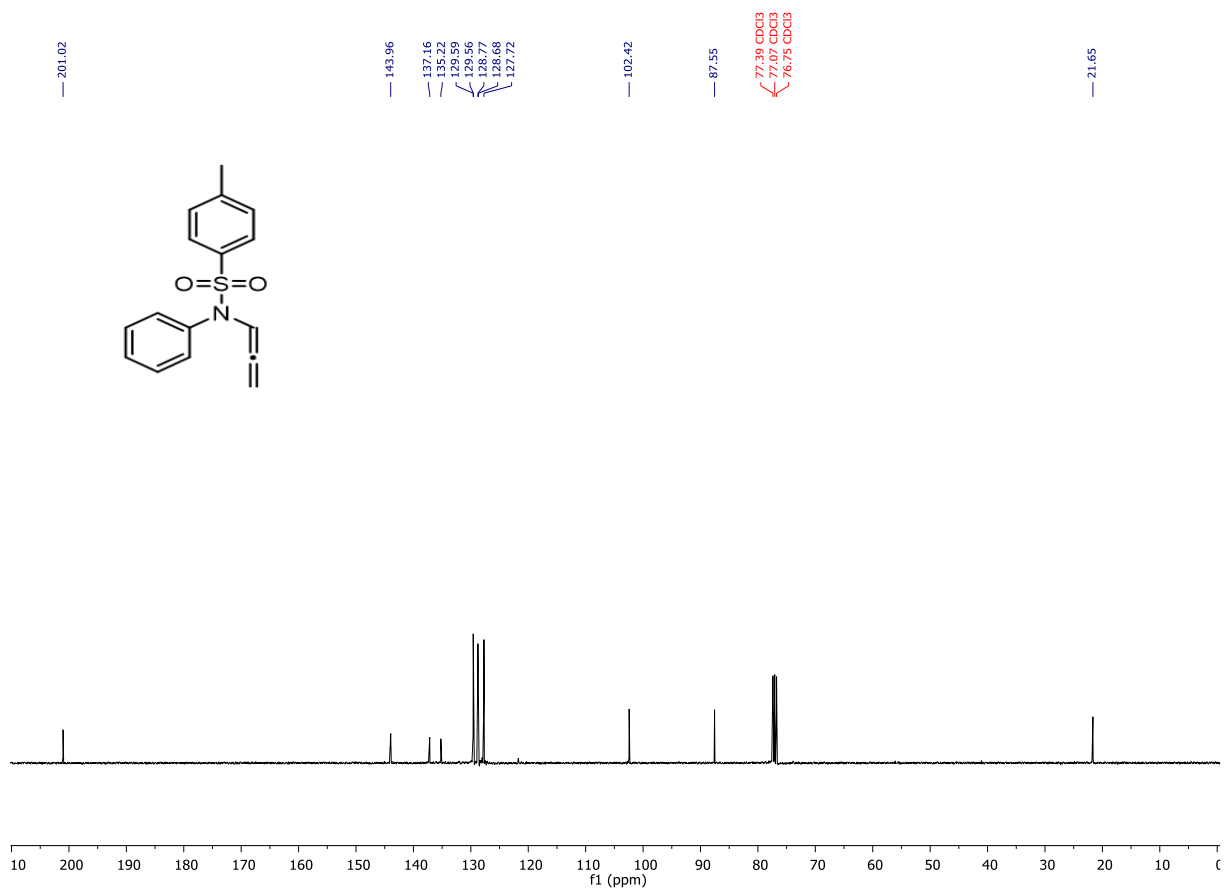

<sup>13</sup>C-NMR of compound **2a** (75 MHz, CDCl<sub>3</sub>)

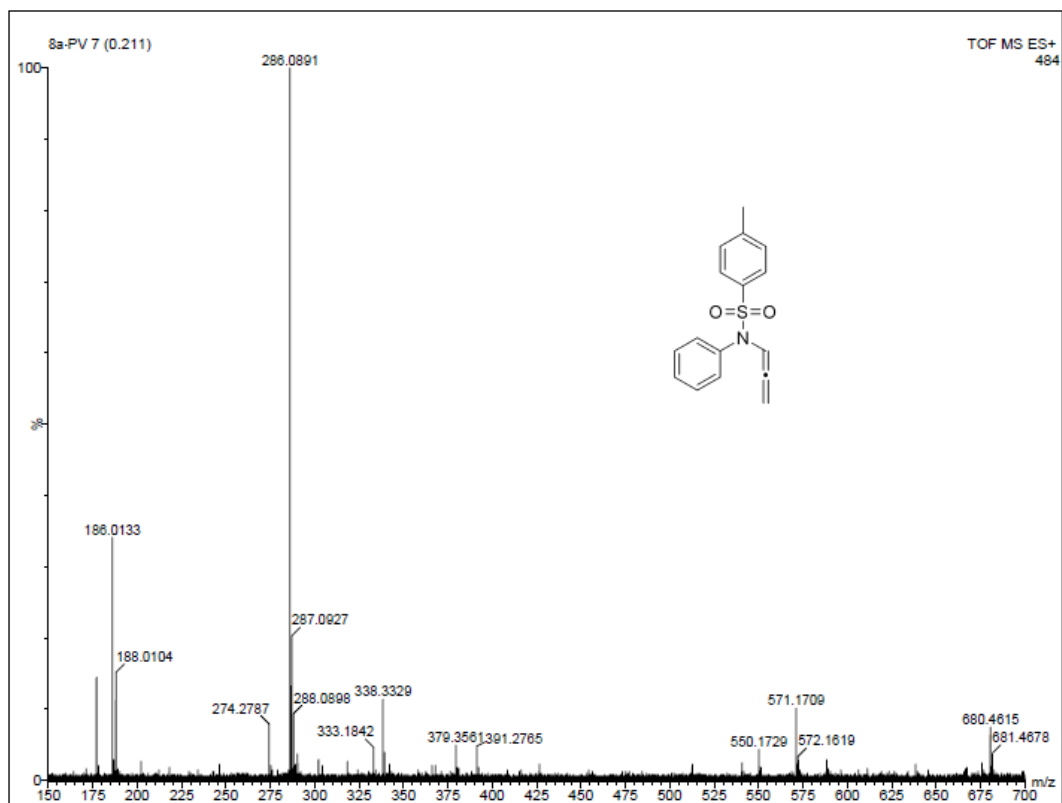

HRMS-ESI of **2a**:  $[M+H]^+$  calcd for  $C_{16}H_{16}NO_2S$  286.0890

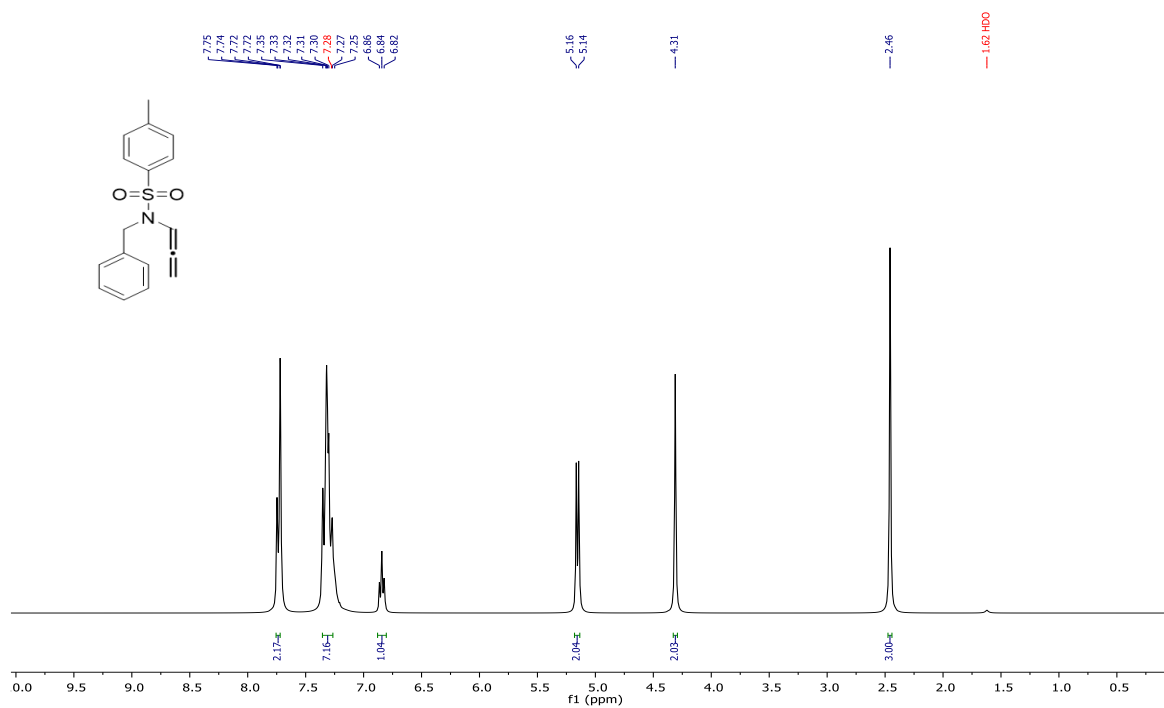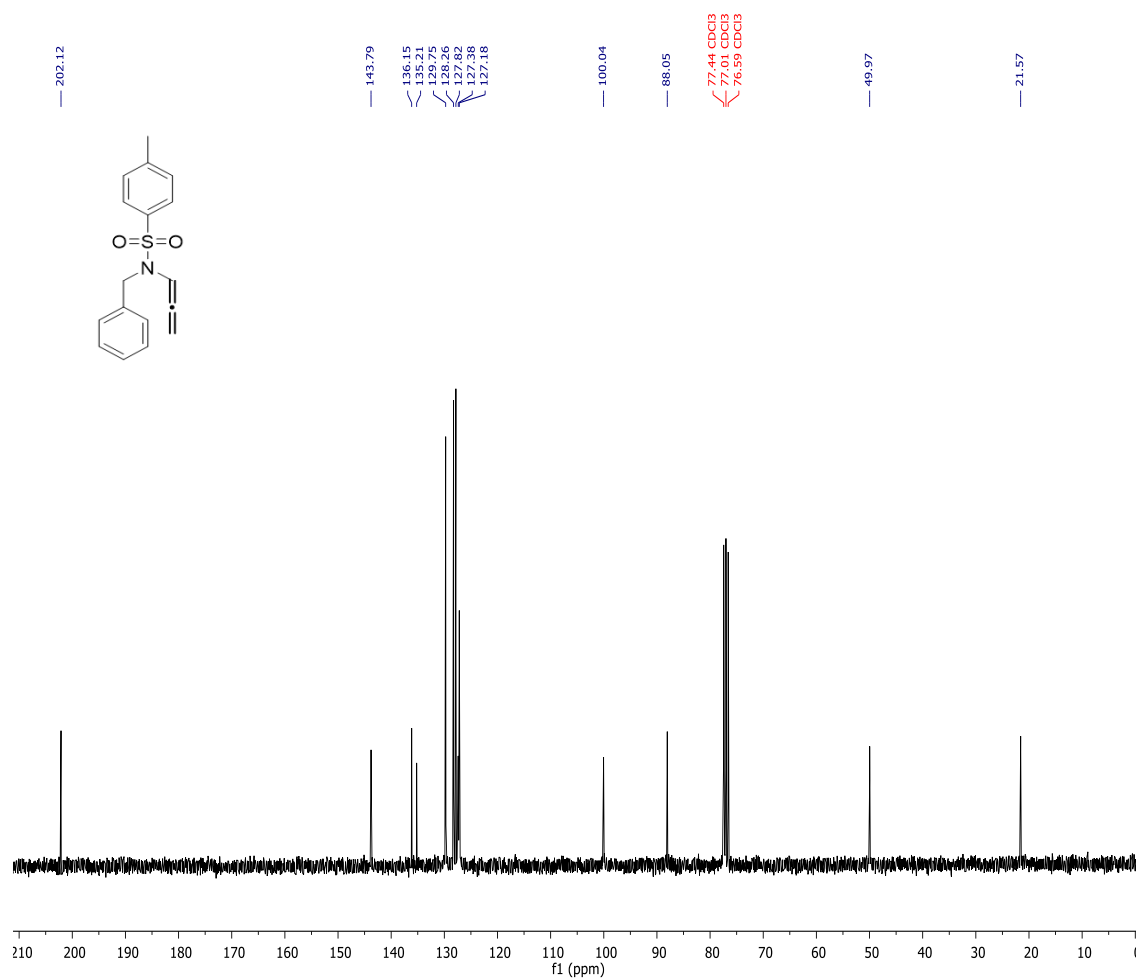

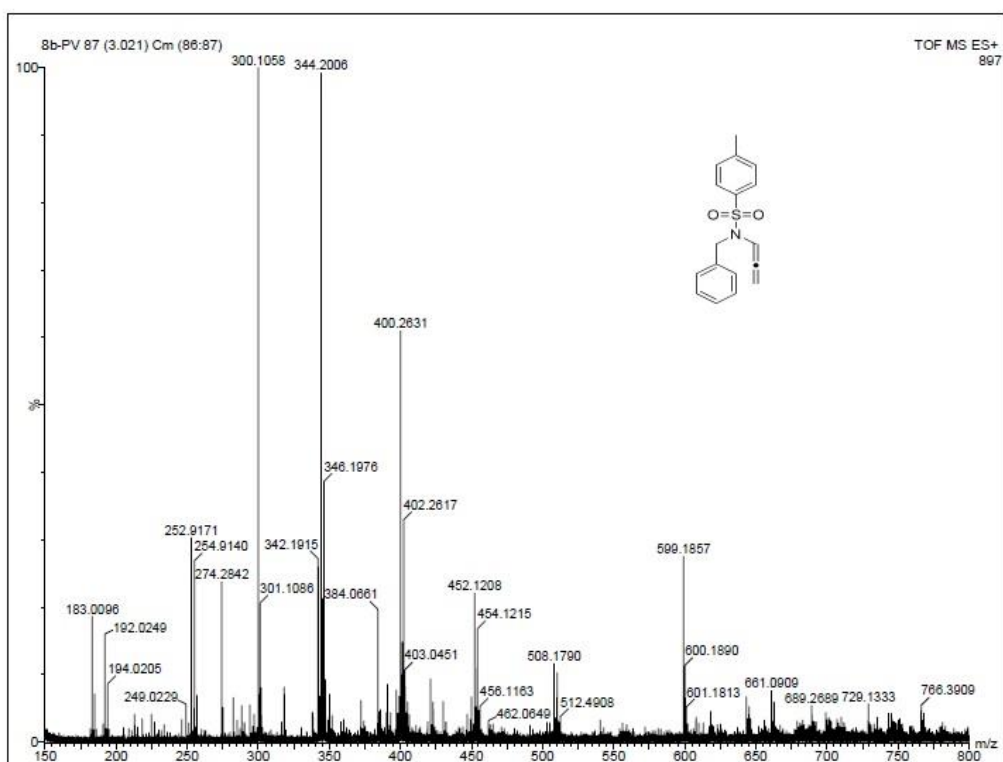

HRMS-ESI of **2b**:  $[M+H]^+$  calcd for  $C_{17}H_{18}NO_2S$  300.1057

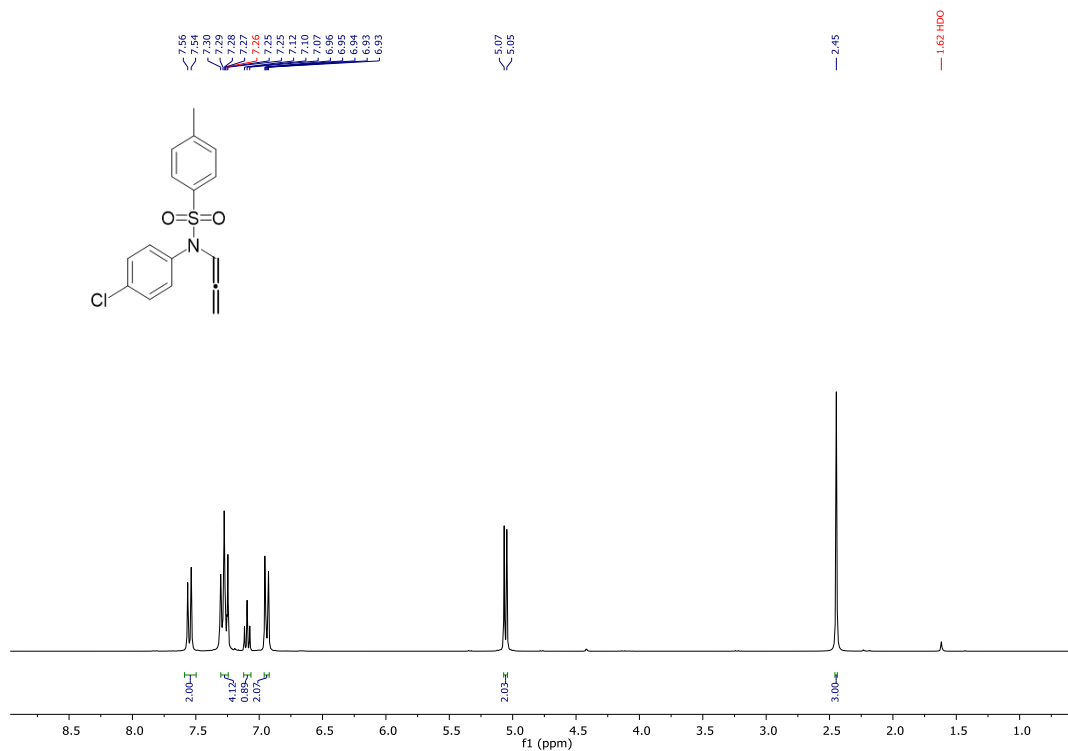

<sup>1</sup>H-NMR of compound **2c** (300MHz, CDCl<sub>3</sub>)

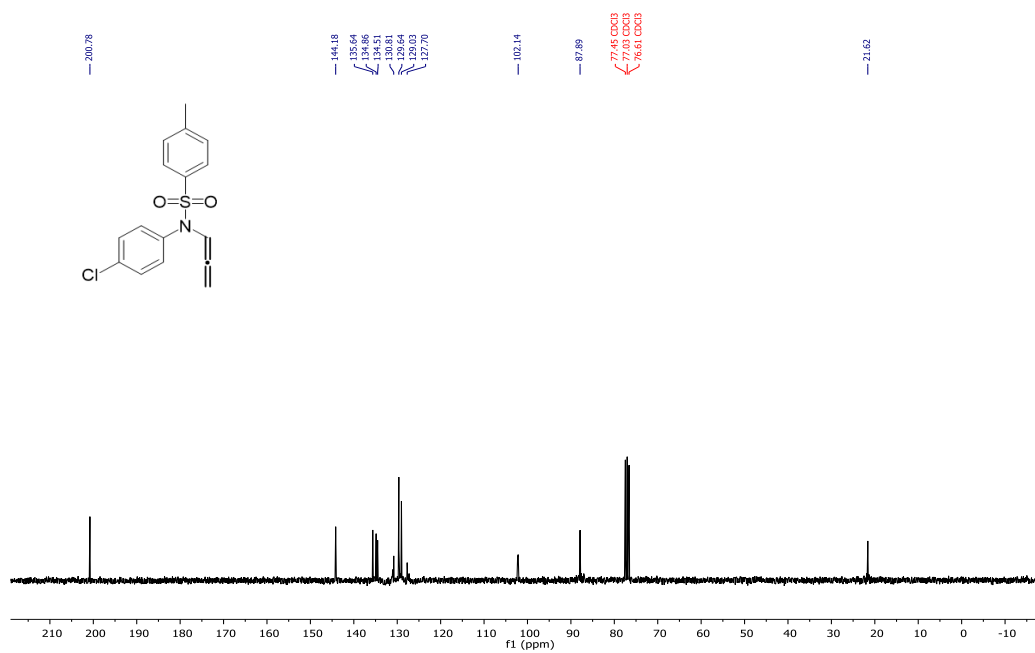

<sup>13</sup>C-NMR of compound **2c** (75 MHz, CDCl<sub>3</sub>)



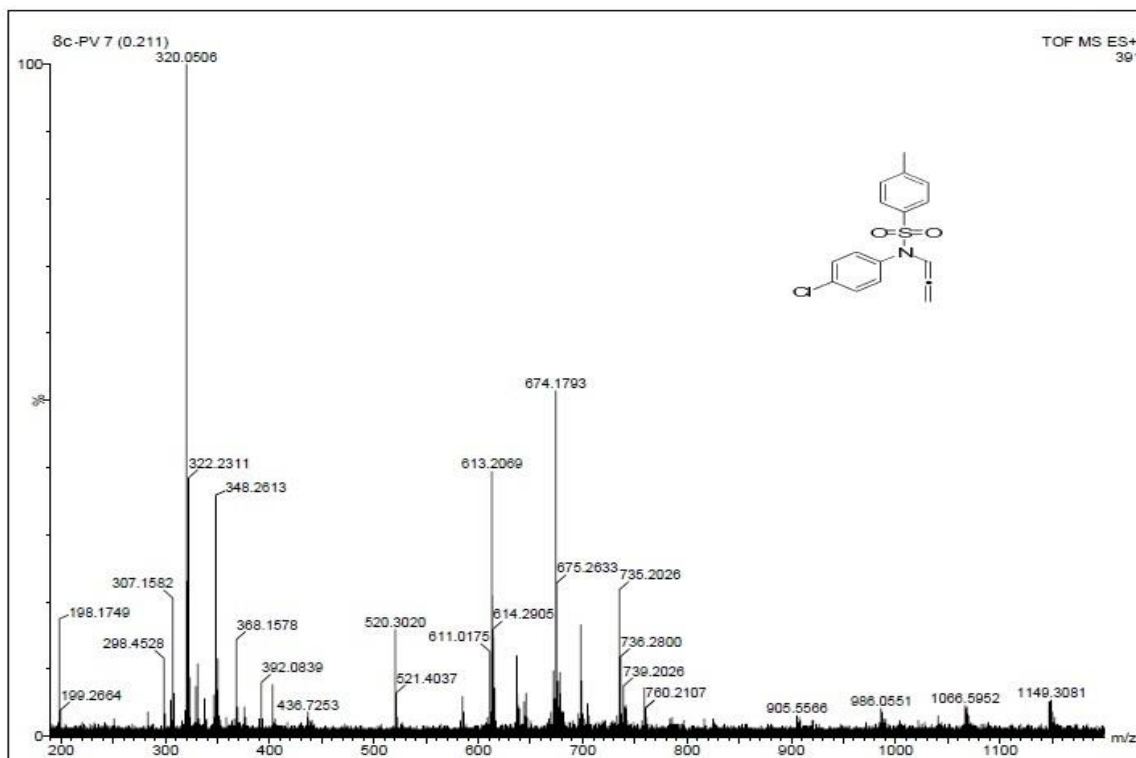

HRMS-ESI of **2c**:  $[M+H]^+$  calcd for  $C_{16}H_{15}^{35}ClNO_2S$  320.0502

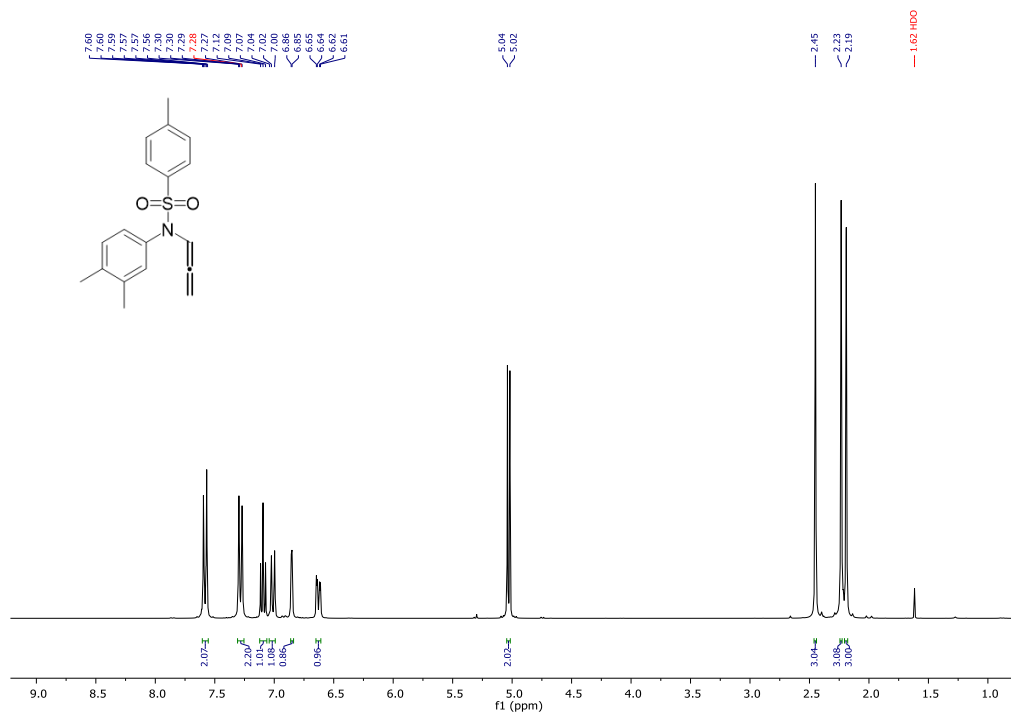

<sup>1</sup>H-NMR of compound 2d (300MHz, CDCl<sub>3</sub>)

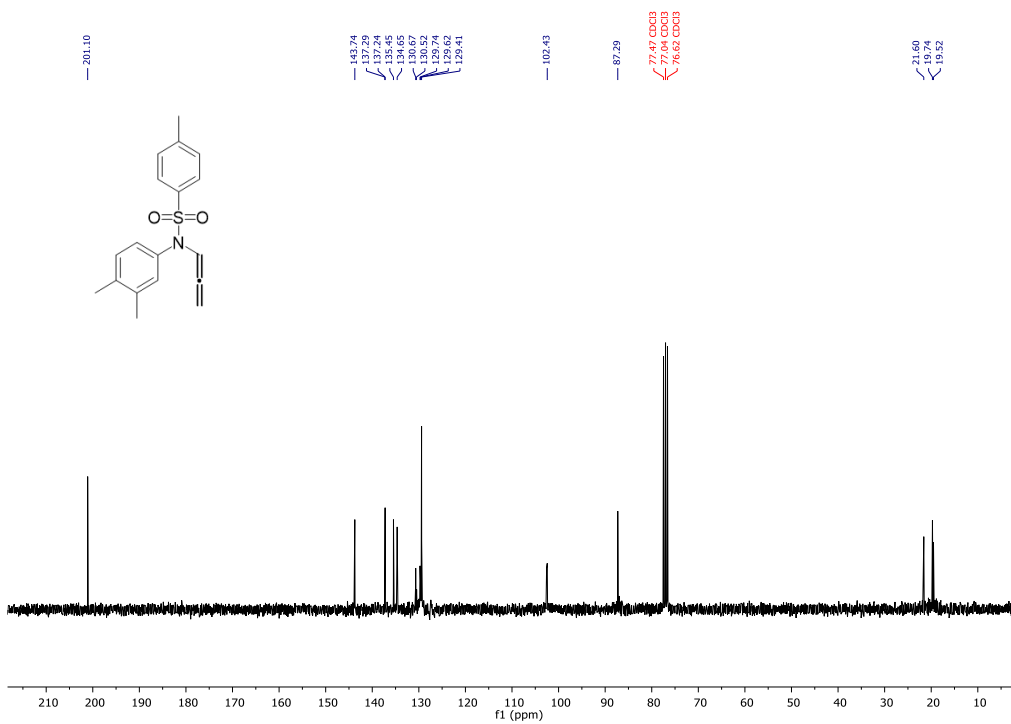

<sup>13</sup>C-NMR of compound 2d (75 MHz, CDCl<sub>3</sub>)

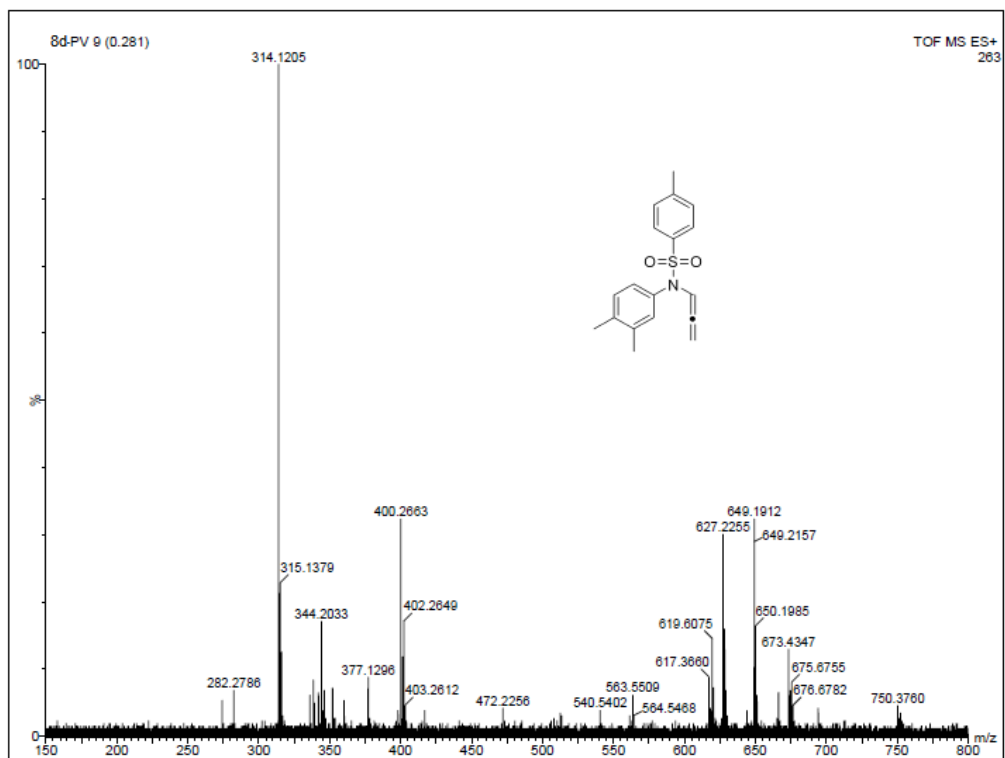

HRMS-ESI of **2d**:  $[M+H]^+$  calcd for  $C_{18}H_{20}NO_2S$  314.1203

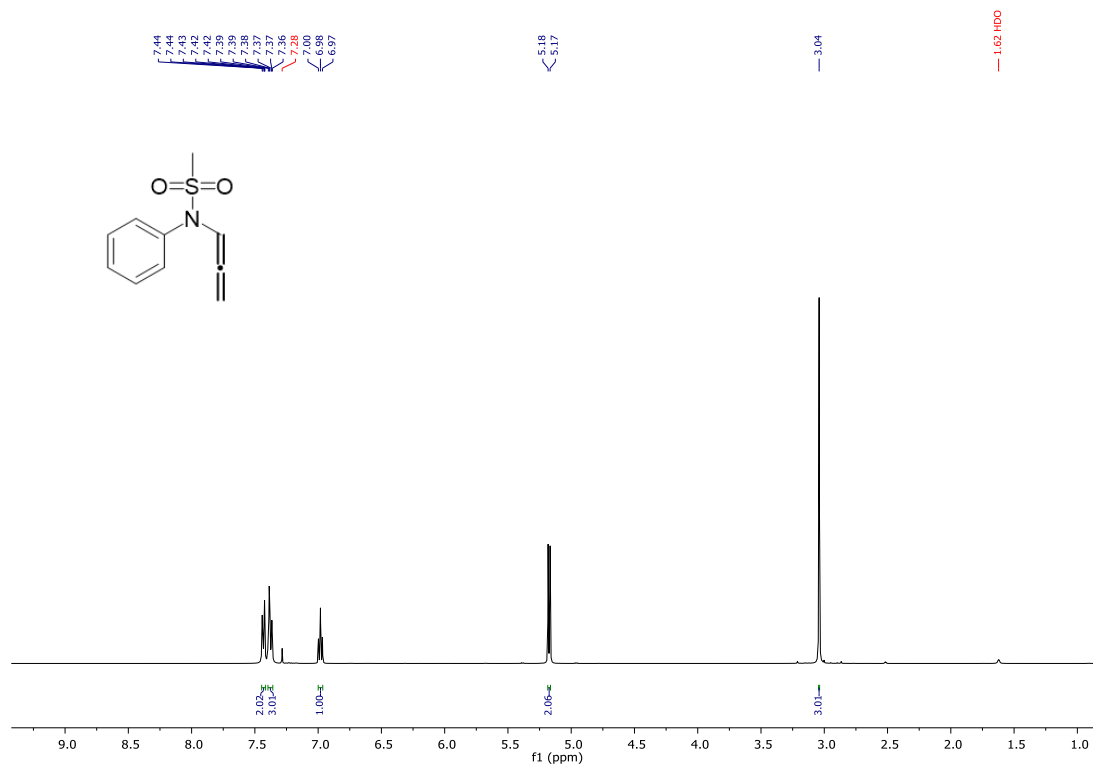

<sup>1</sup>H-NMR of compound **2e** (400MHz, CDCl<sub>3</sub>)

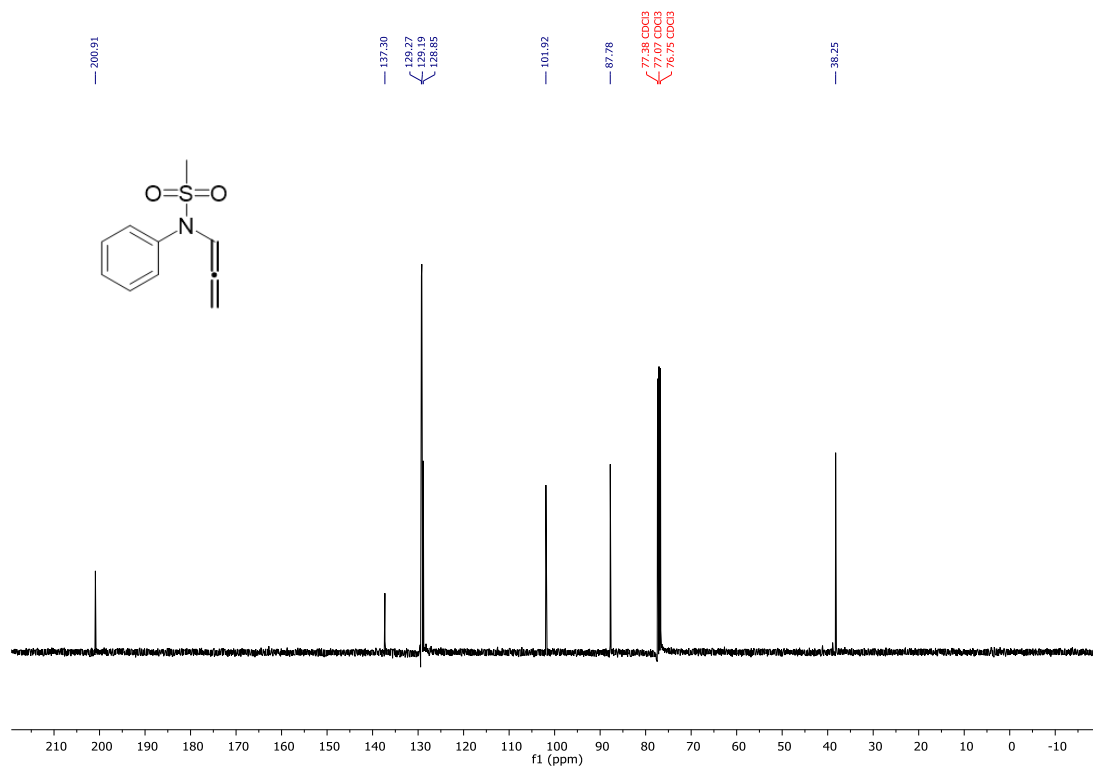

<sup>13</sup>C-NMR of compound **2e** (101 MHz, CDCl<sub>3</sub>)

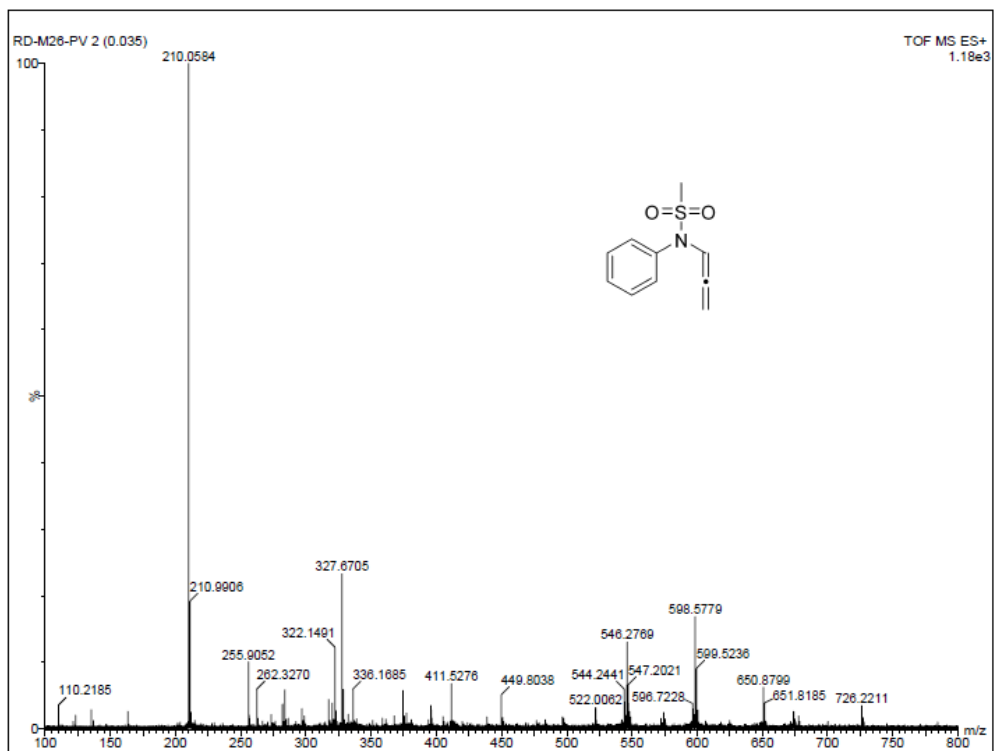

HRMS-ESI of **2e**:  $[M+H]^+$  calcd for  $C_{10}H_{12}NO_2S$  210.0581

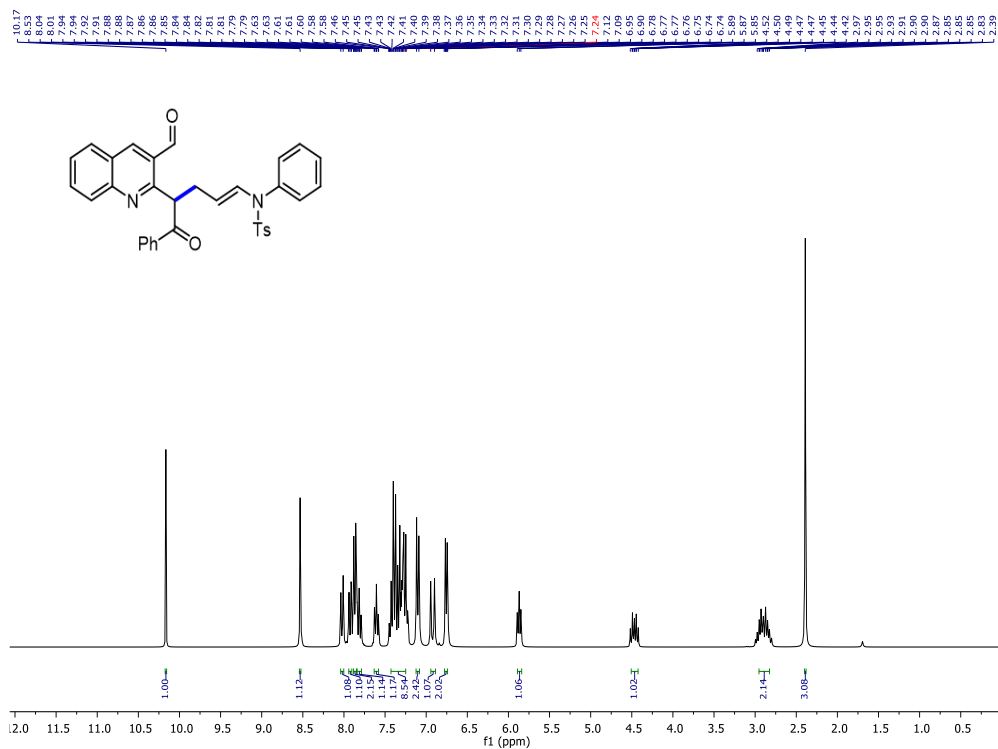

<sup>1</sup>H-NMR of compound 3a (300MHz, CDCl<sub>3</sub>)

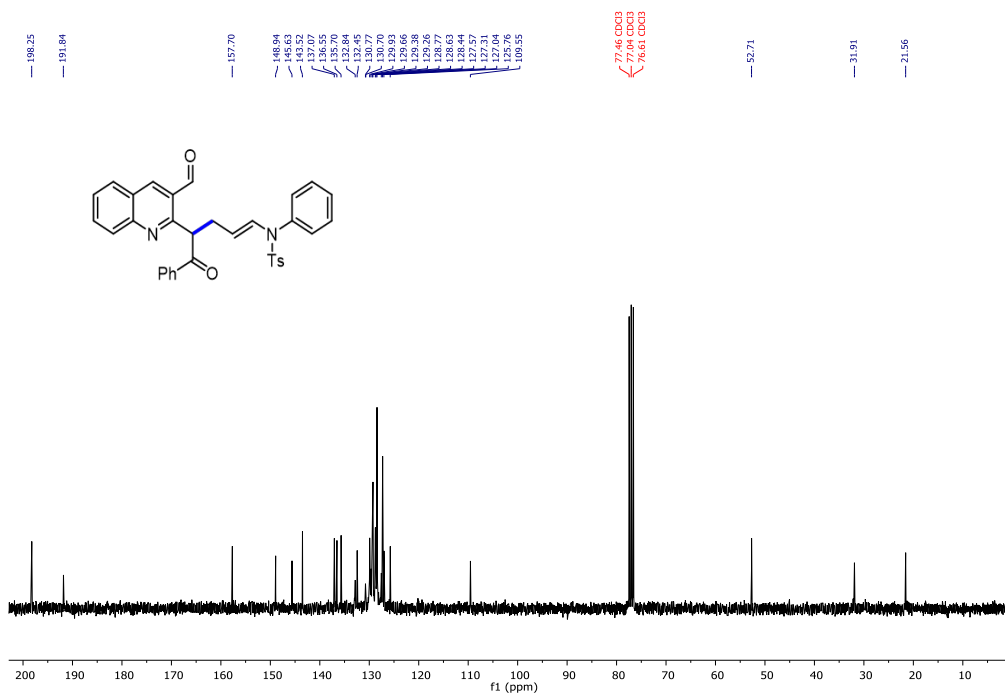

<sup>13</sup>C-NMR of compound 3a (75 MHz, CDCl<sub>3</sub>)

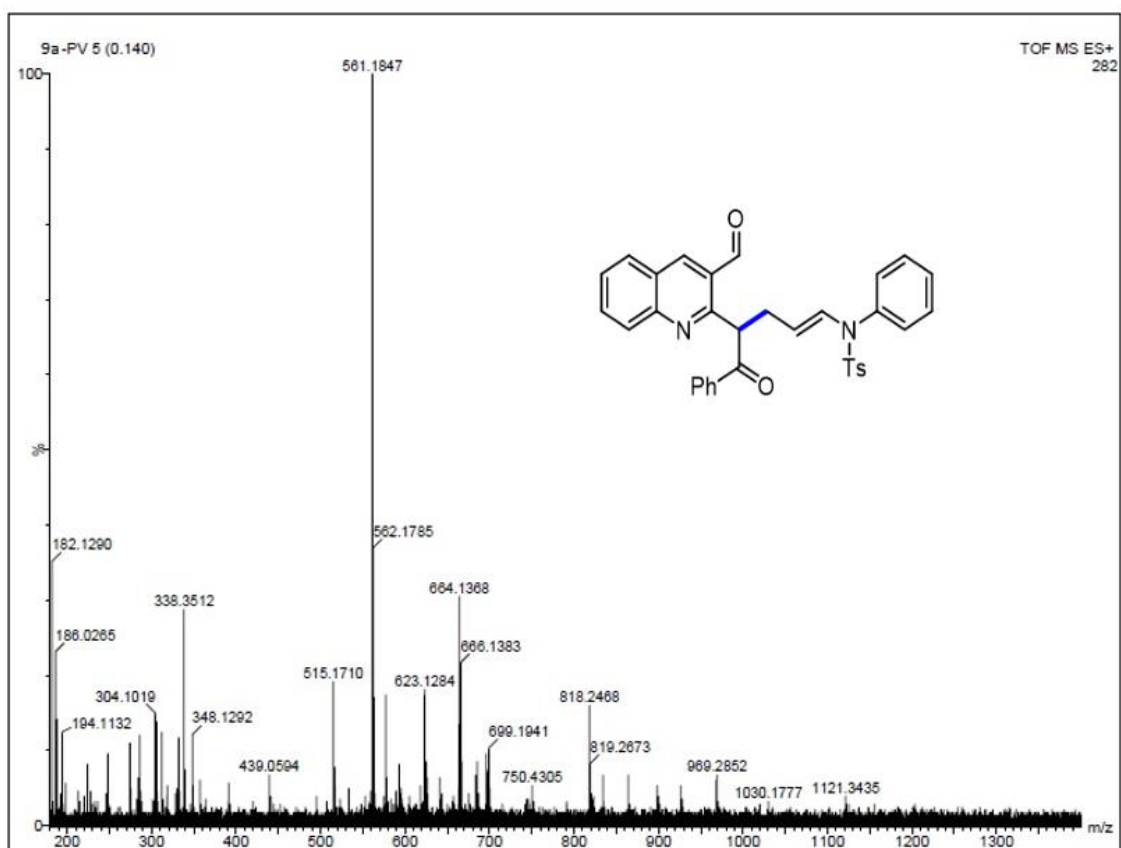

HRMS-ESI of **3a**:  $[M+H]^+$  calcd for  $C_{34}H_{28}N_2O_4S$  561.1844

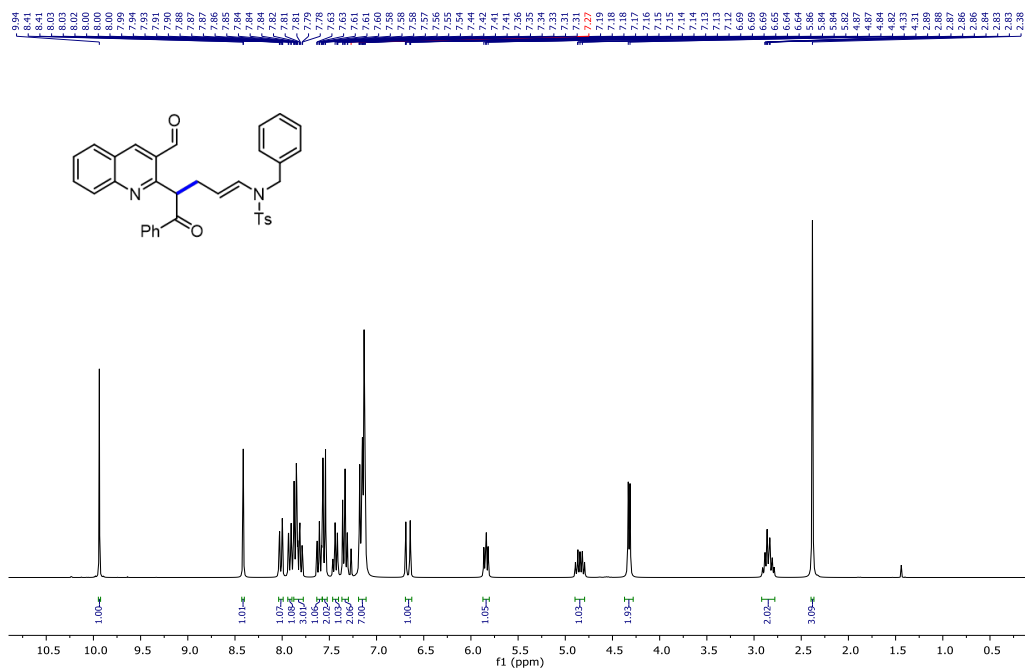

$^1\text{H-NMR}$  of compound **3b** (300MHz,  $\text{CDCl}_3$ )

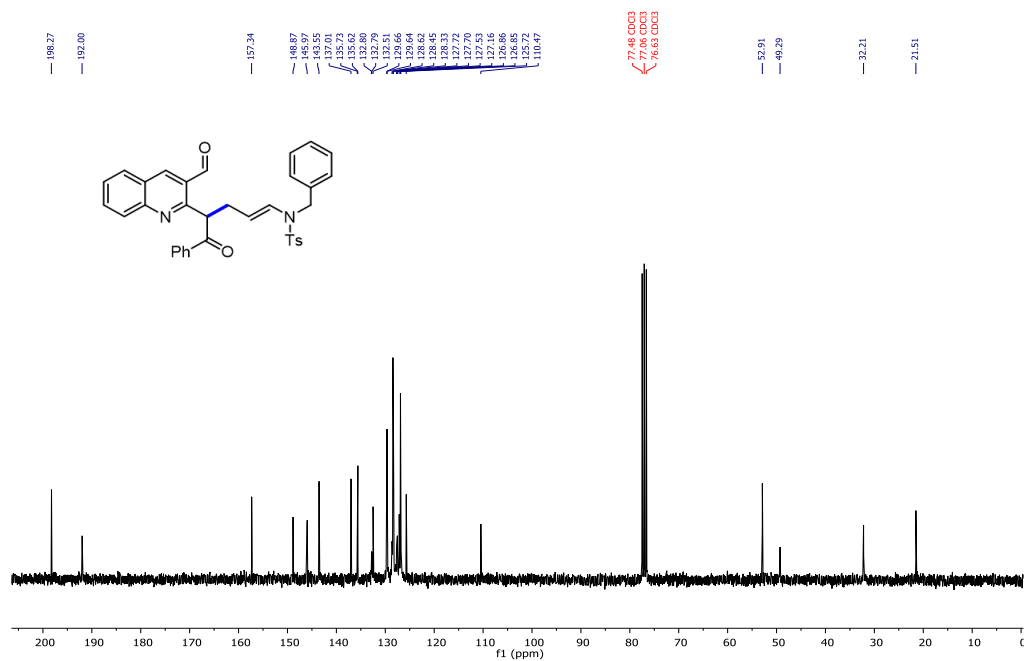

$^{13}\text{C-NMR}$  of compound **3b** (75 MHz,  $\text{CDCl}_3$ )



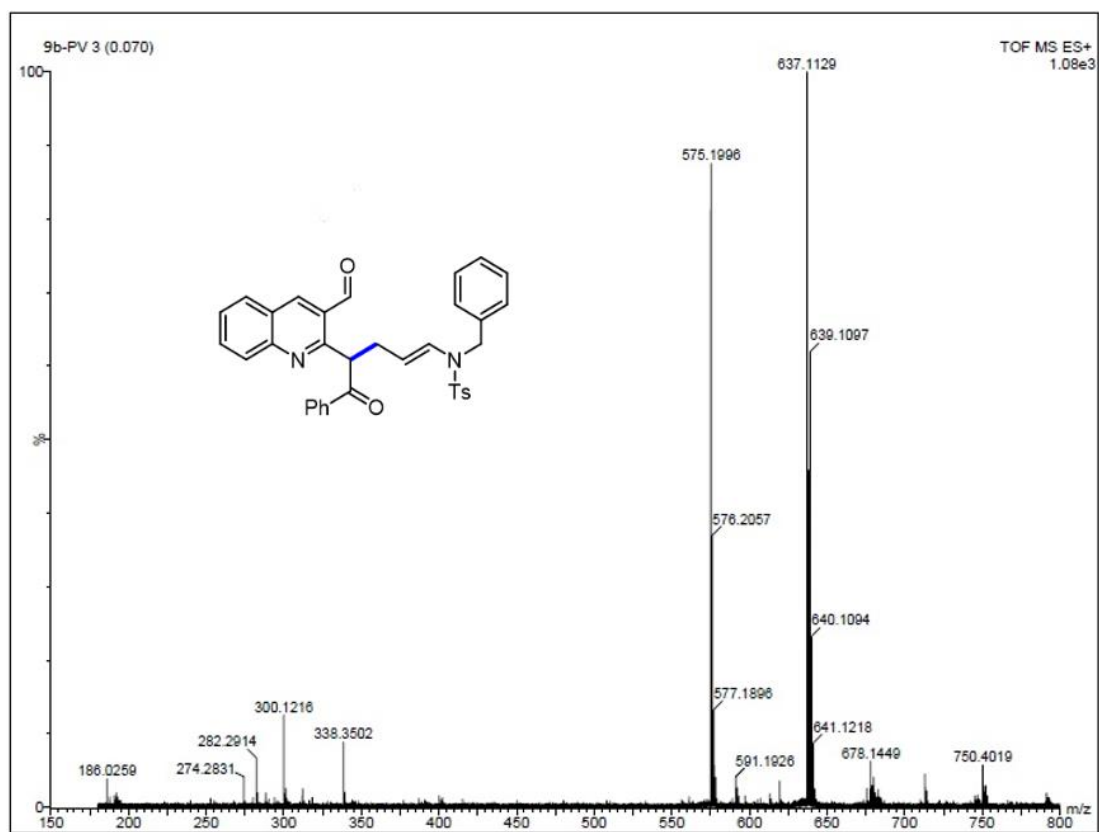

HRMS-ESI of **3b**:  $[M+H]^+$  calcd for  $C_{35}H_{31}N_2O_4S$  575.1992

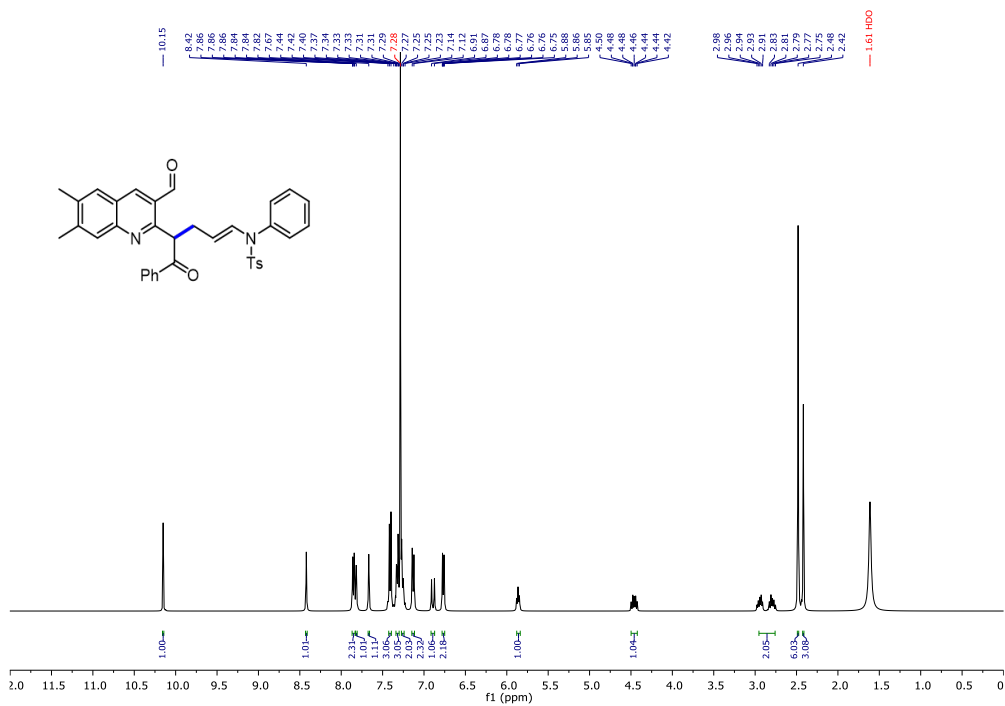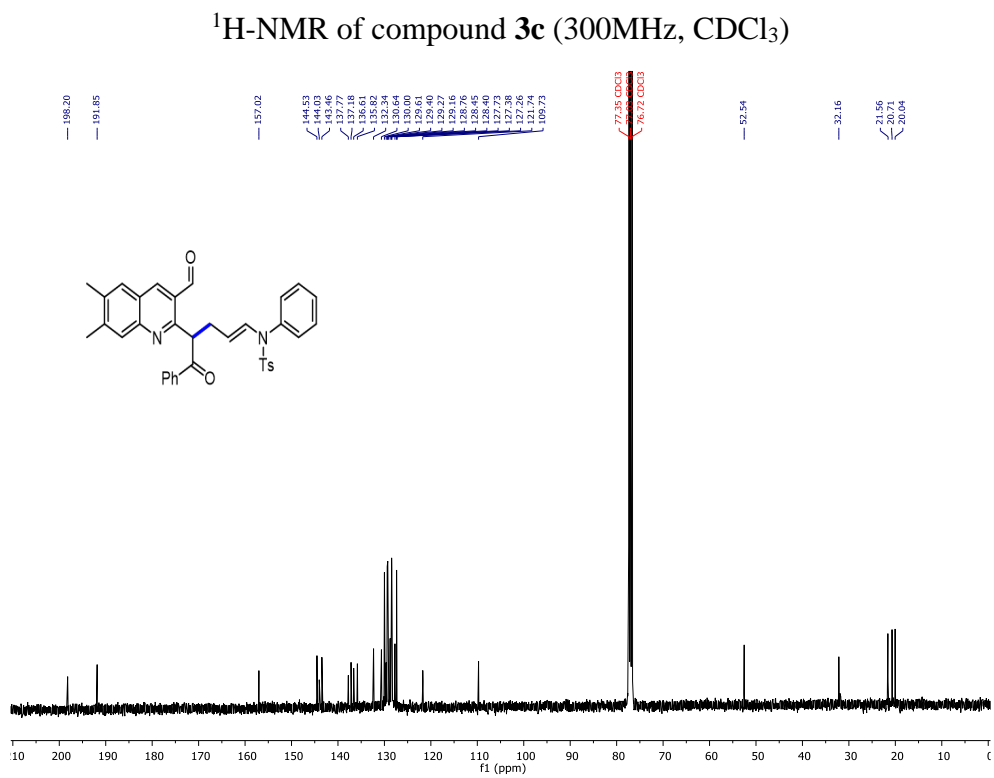

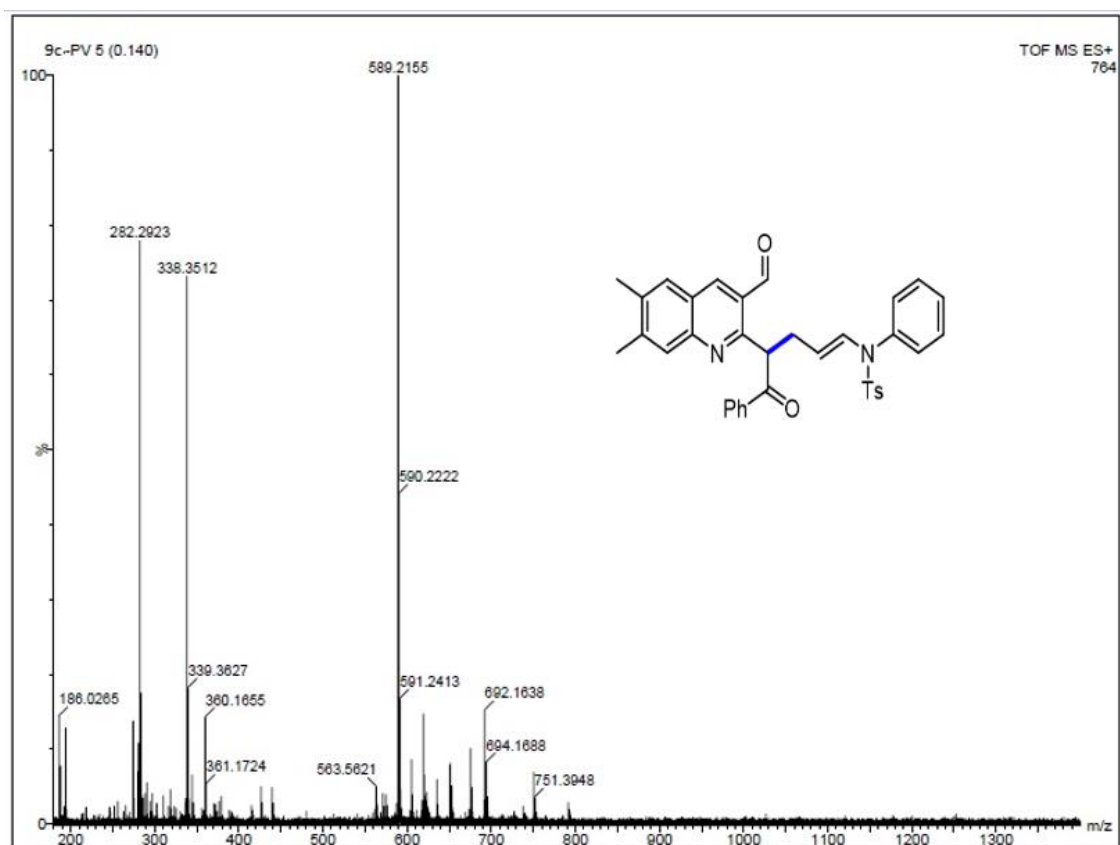

HRMS-ESI of **3c**:  $[M+H]^+$  calcd for  $C_{36}H_{33}N_2O_4S$  589.2150

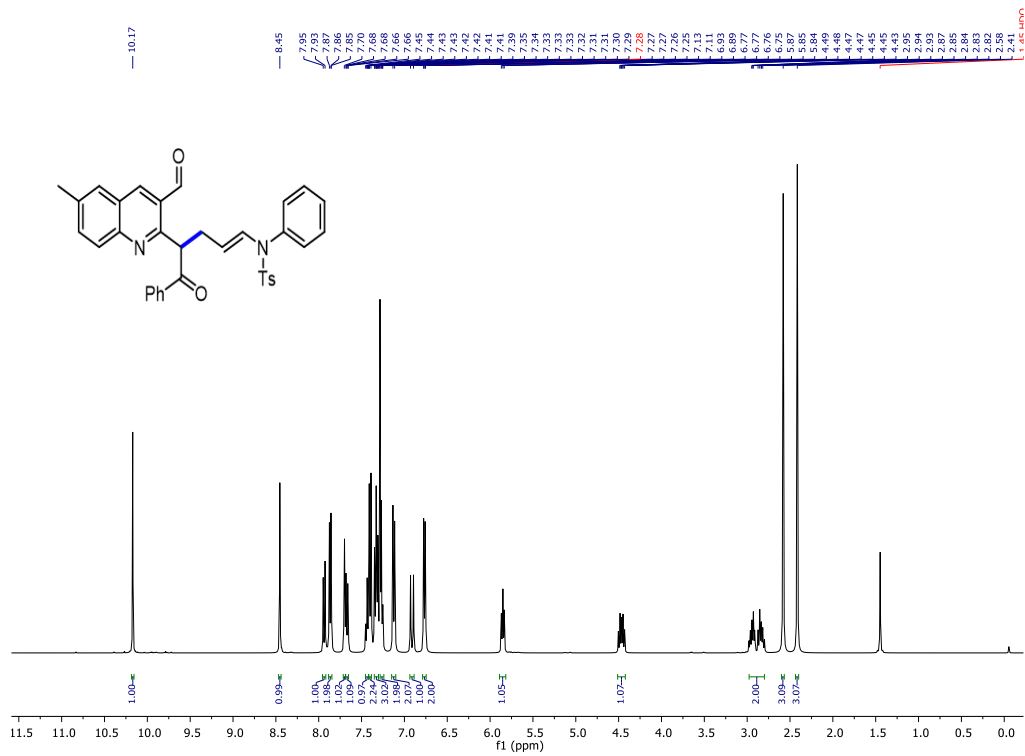

$^1\text{H-NMR}$  of compound **3d** (400 MHz,  $\text{CDCl}_3$ )

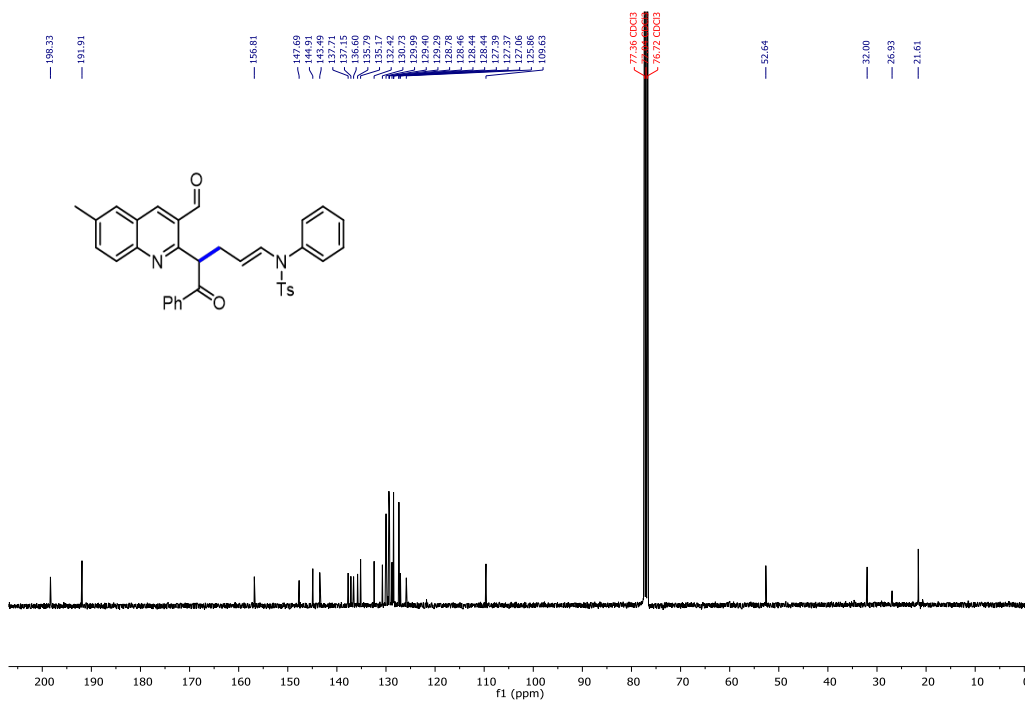

$^{13}\text{C-NMR}$  of compound **3d** (101 MHz,  $\text{CDCl}_3$ )

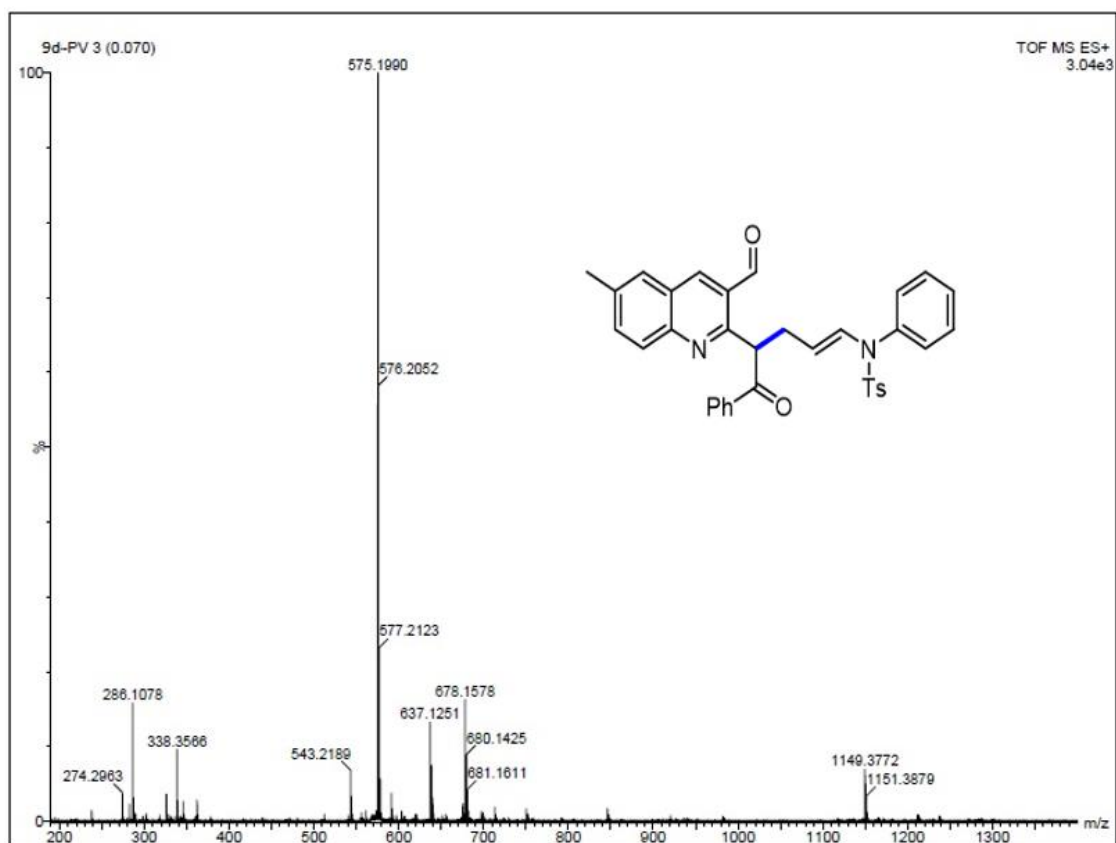

HRMS-ESI of **3d**:  $[M+H]^+$  calcd for  $C_{35}H_{31}N_2O_4S$  575.1984

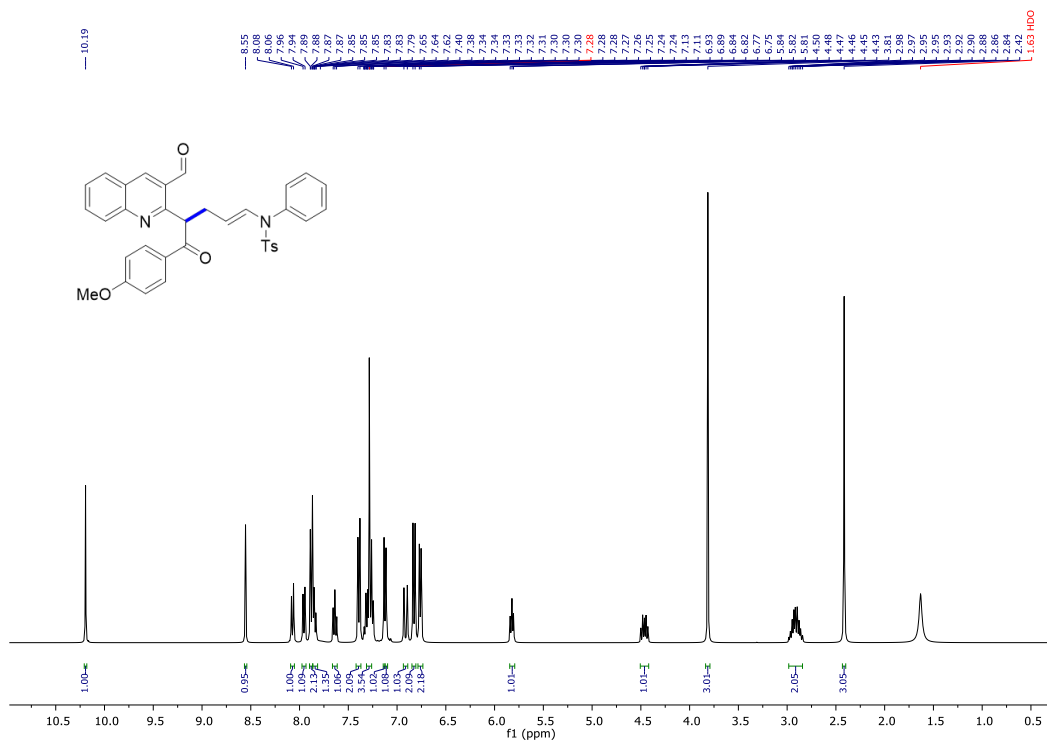

$^1\text{H-NMR}$  of compound **3e** (400 MHz,  $\text{CDCl}_3$ )

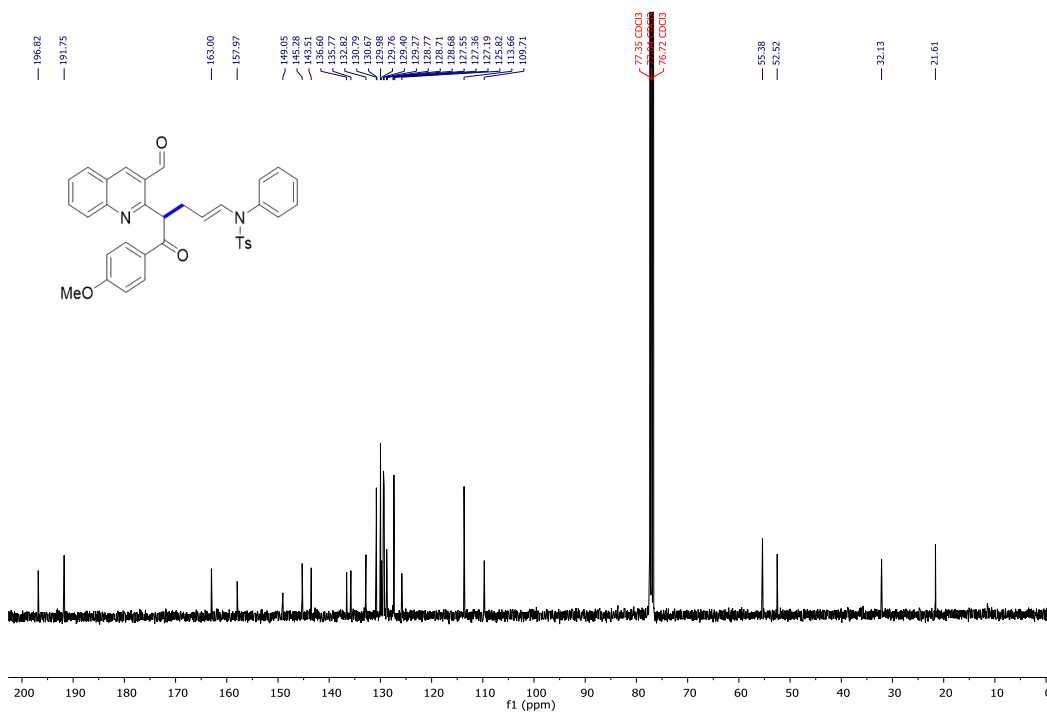

$^{13}\text{C-NMR}$  of compound **3e** (101 MHz,  $\text{CDCl}_3$ )

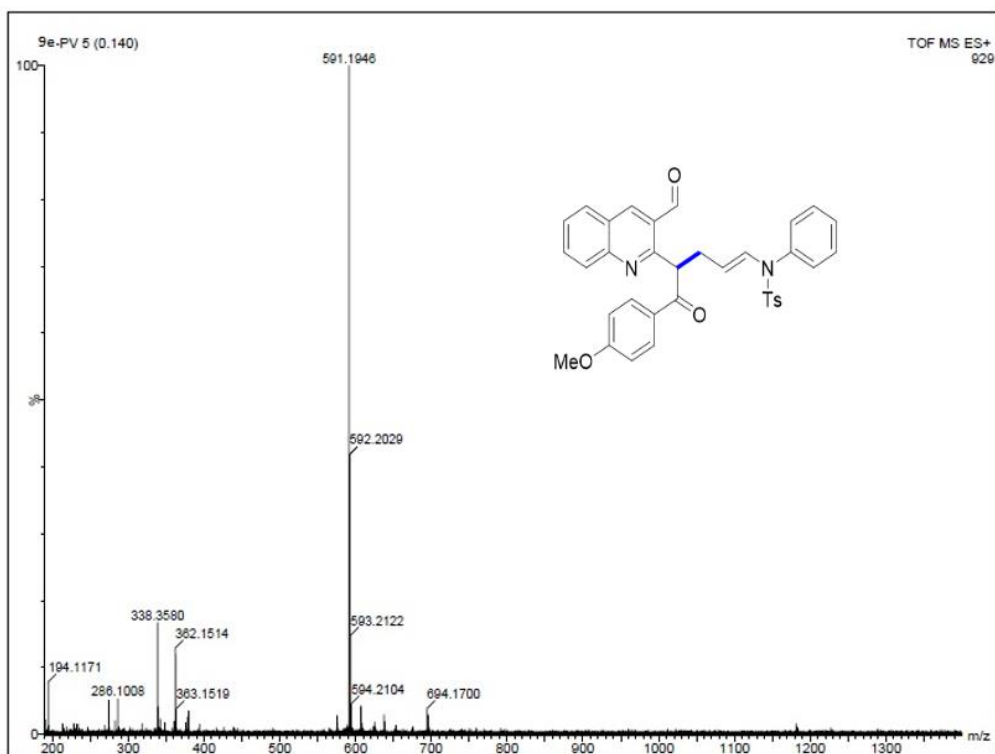

HRMS-ESI of **3e**:  $[M+H]^+$  calcd for  $C_{35}H_{31}N_2O_5S$  591.1944

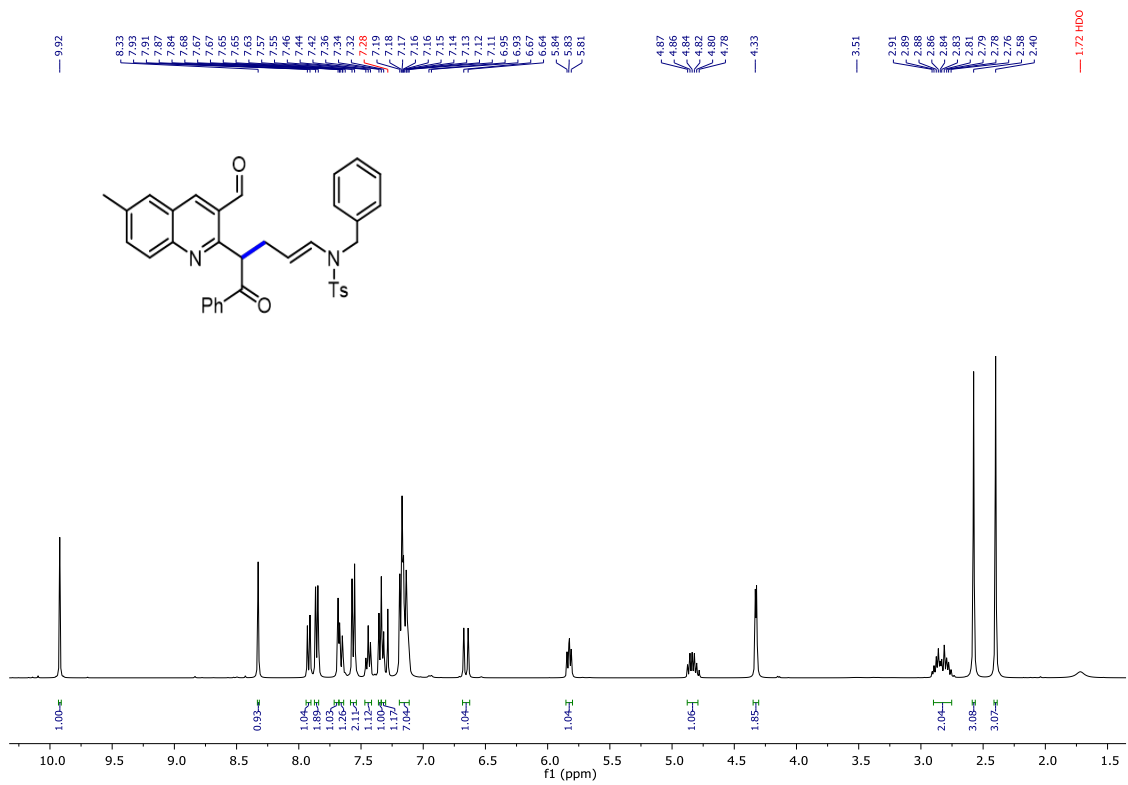

<sup>1</sup>H-NMR of compound **3f** (400 MHz, CDCl<sub>3</sub>)

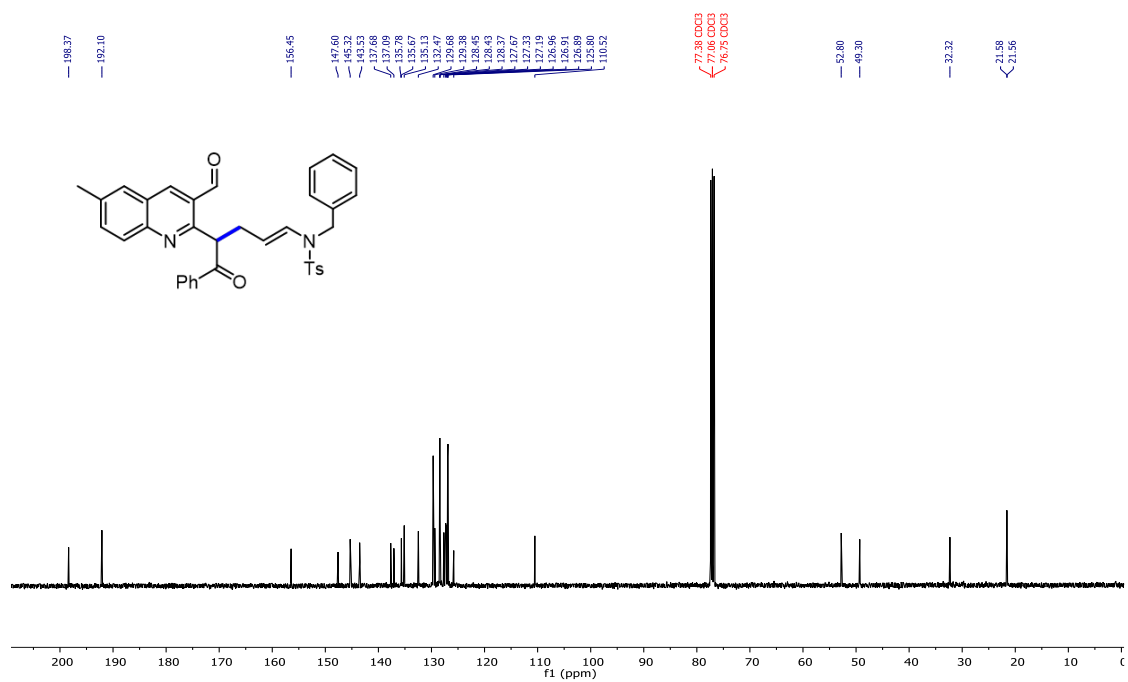

<sup>13</sup>C-NMR of compound **3f** (101 MHz, CDCl<sub>3</sub>)



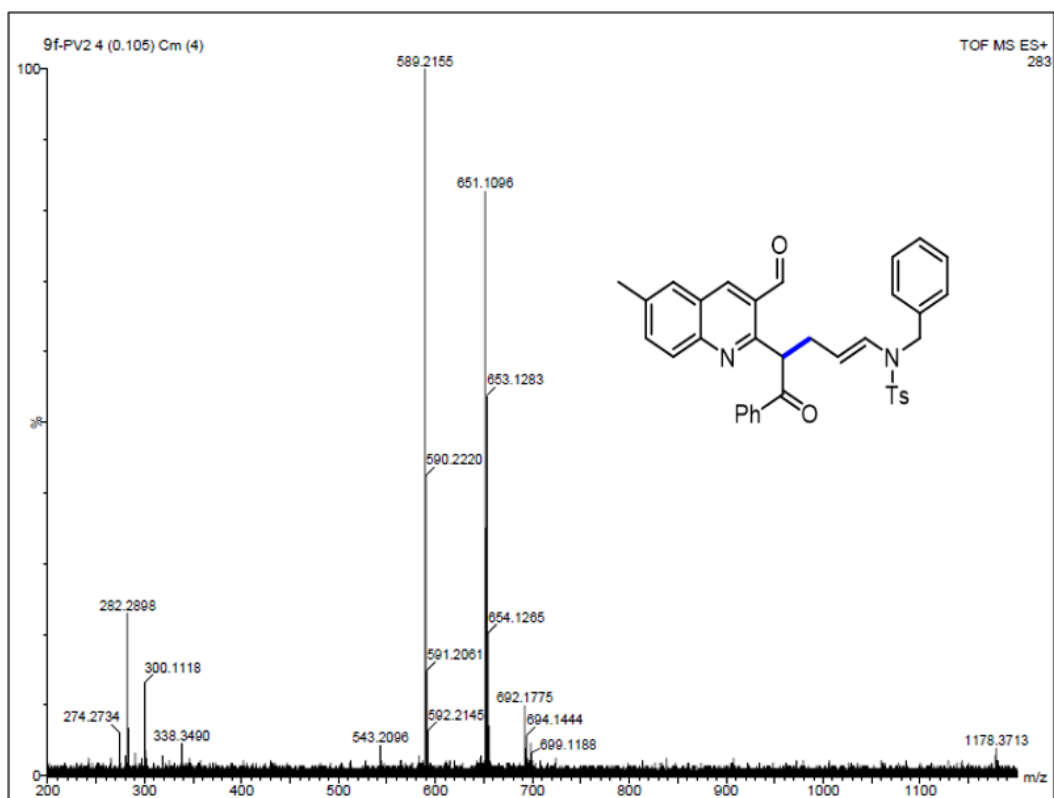

HRMS-ESI of **3f**:  $[M+H]^+$  calcd for  $C_{36}H_{33}N_2O_4S$  589.2153

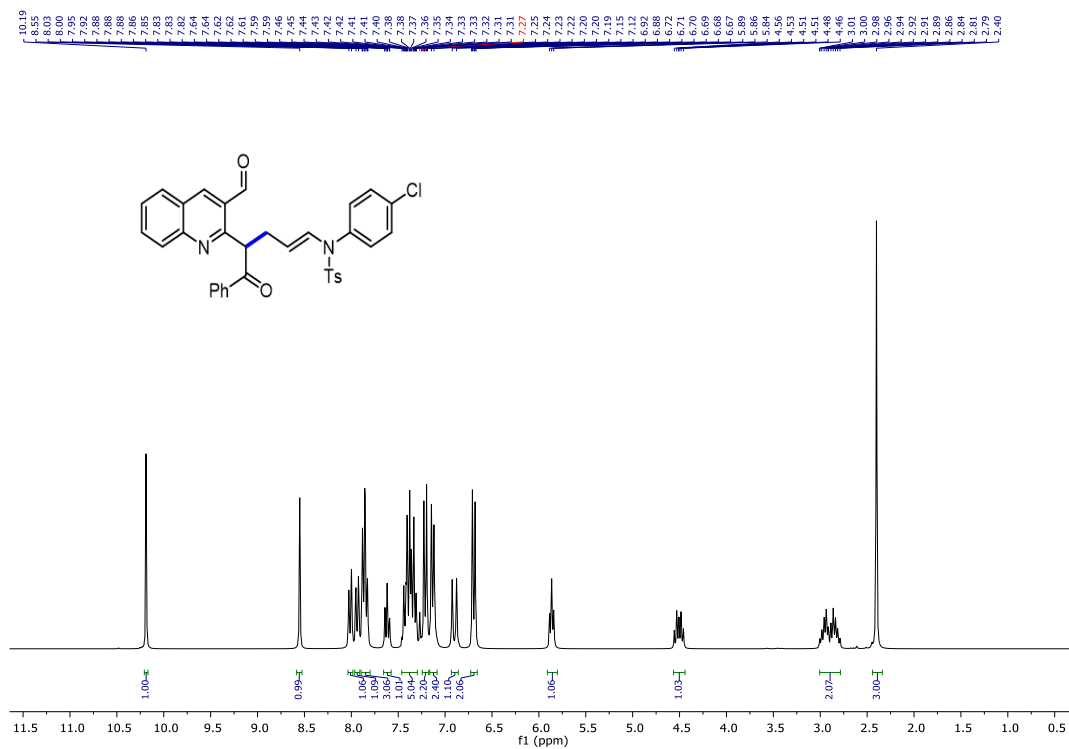

<sup>1</sup>H-NMR of compound **3g** (300MHz, CDCl<sub>3</sub>)

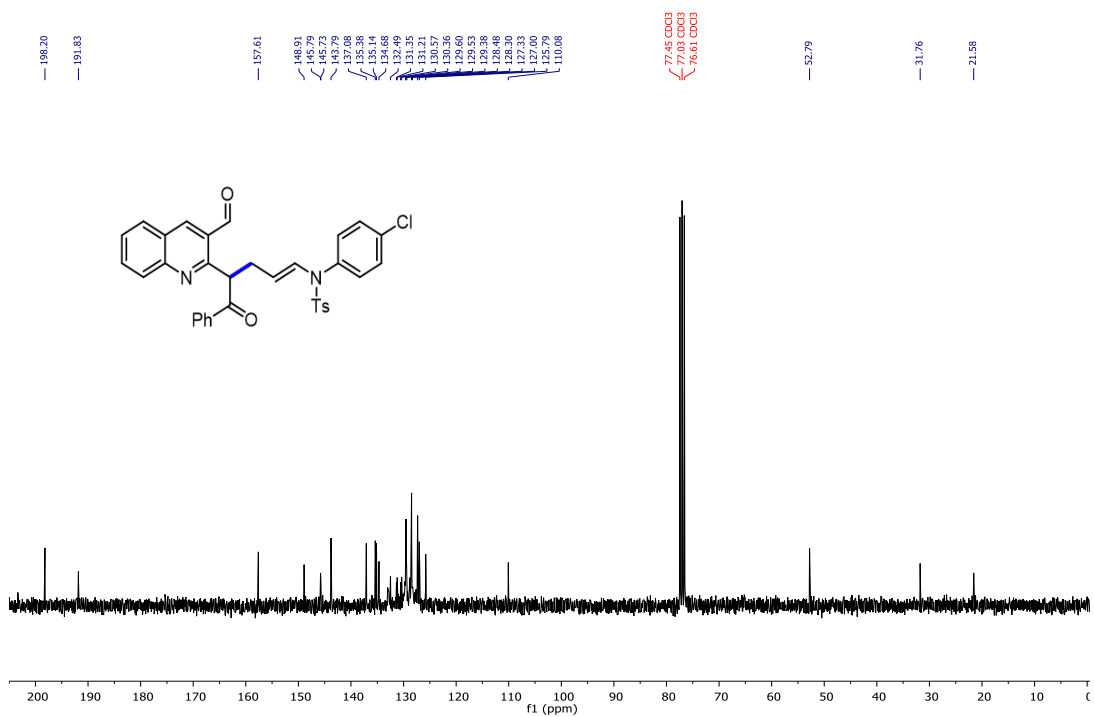

<sup>13</sup>C-NMR of compound **3g** (75 MHz, CDCl<sub>3</sub>)

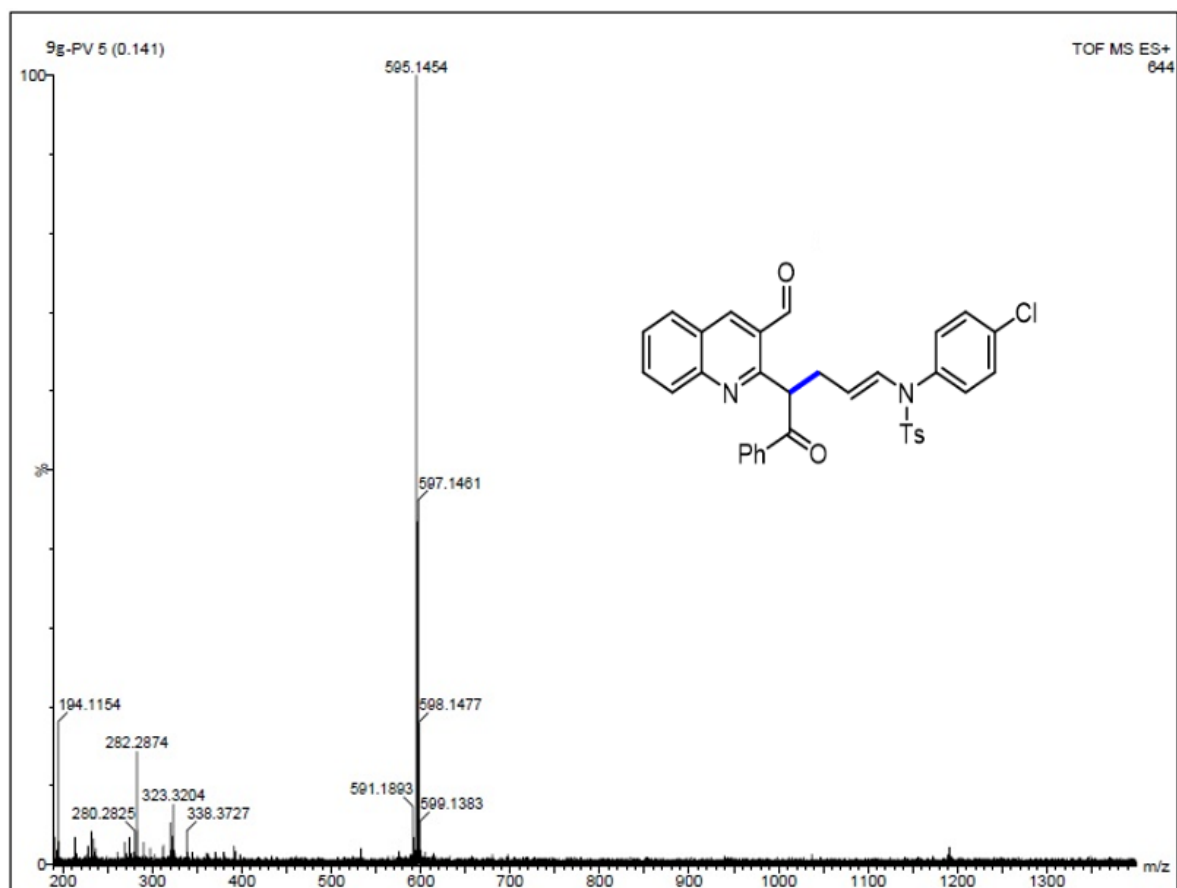

HRMS-ESI of **3g**:  $[M+H]^+$  calcd for  $C_{34}H_{28}^{35}ClN_2O_4S$  595.1452

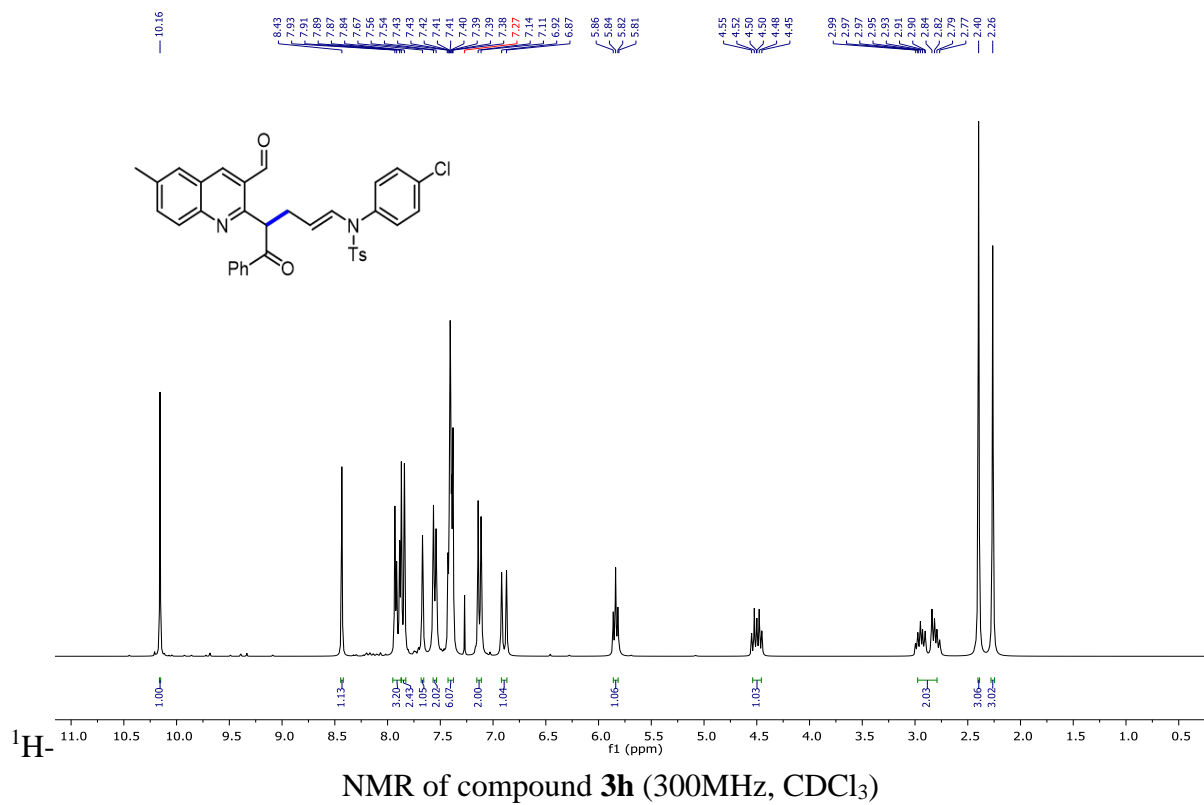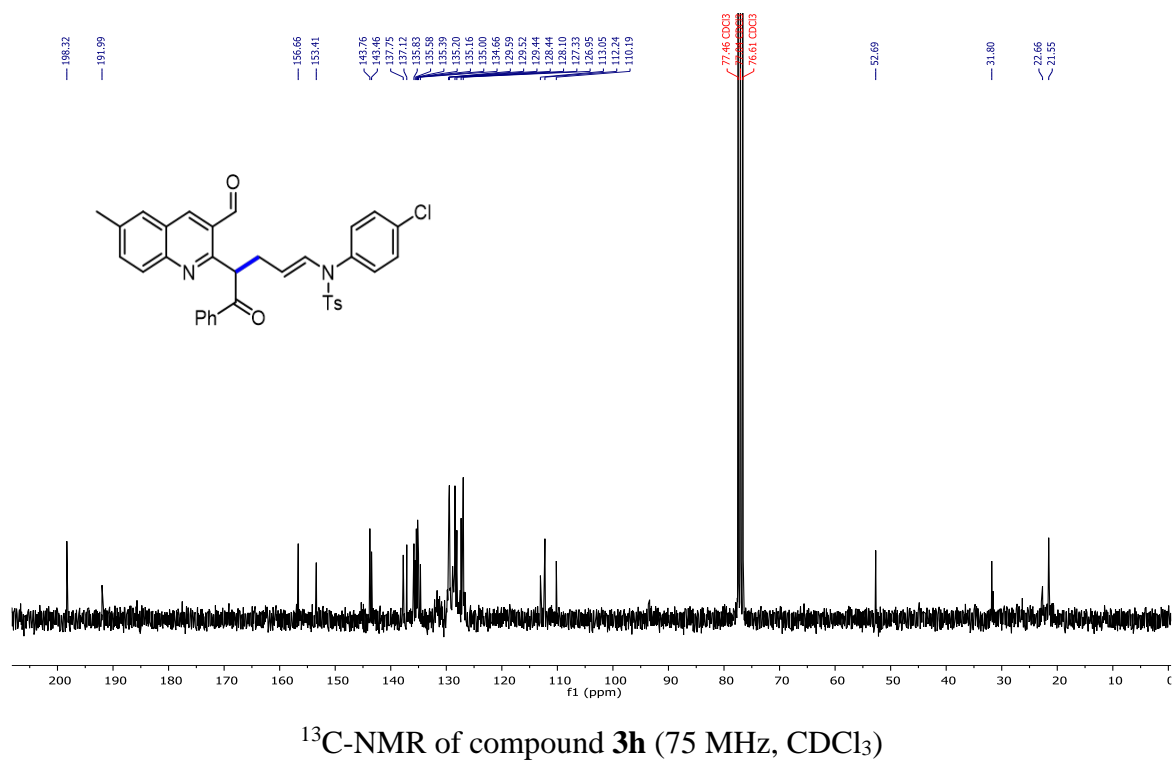

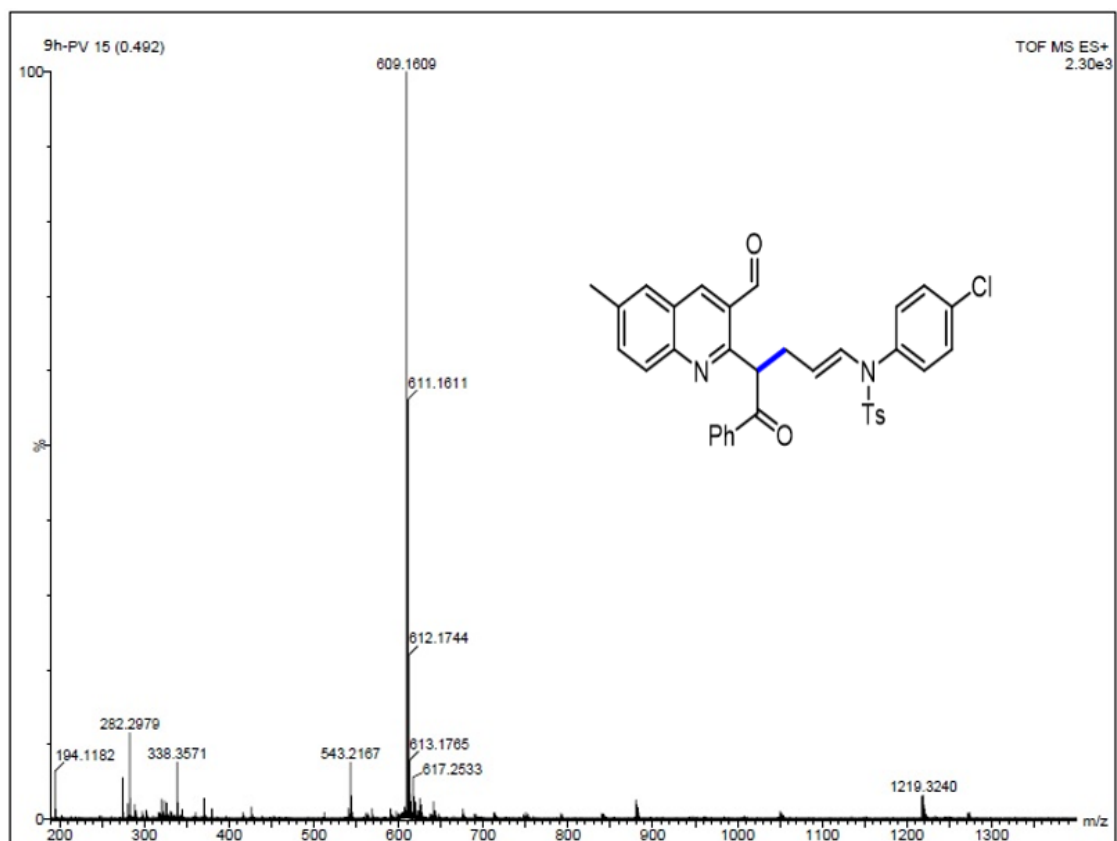

HRMS-ESI of **3h**:  $[M+H]^+$  calcd for  $C_{35}H_{30}^{35}ClN_2O_4S$  609.1604

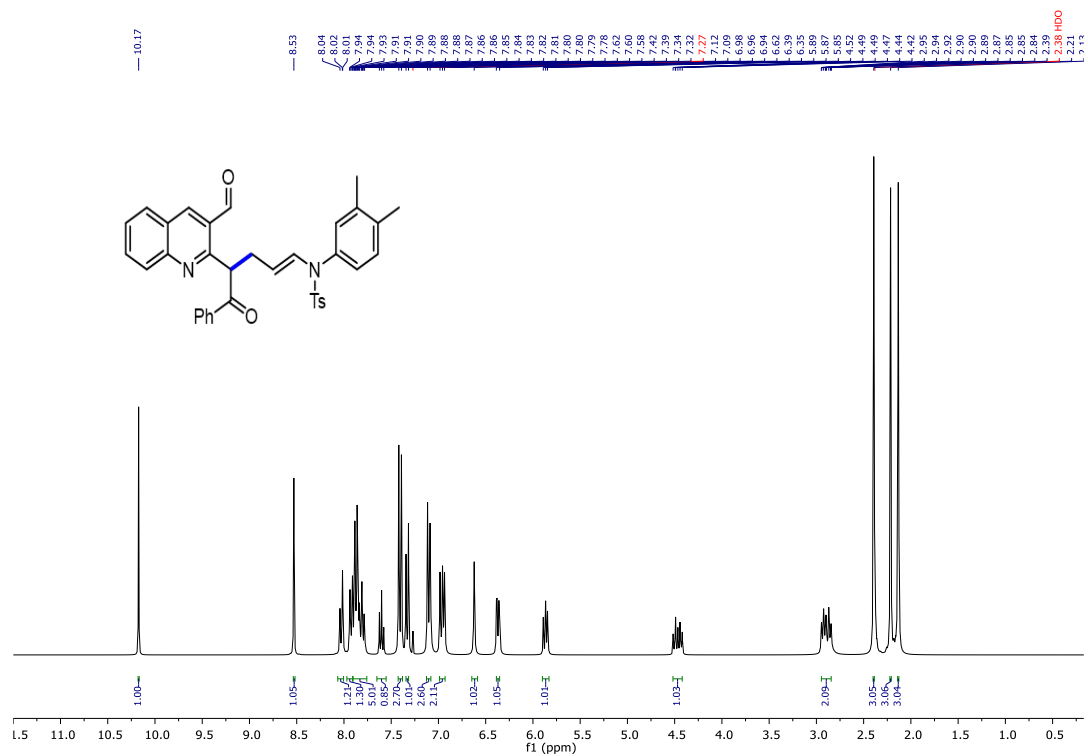

<sup>1</sup>H-NMR of compound **3i** (300MHz, CDCl<sub>3</sub>)

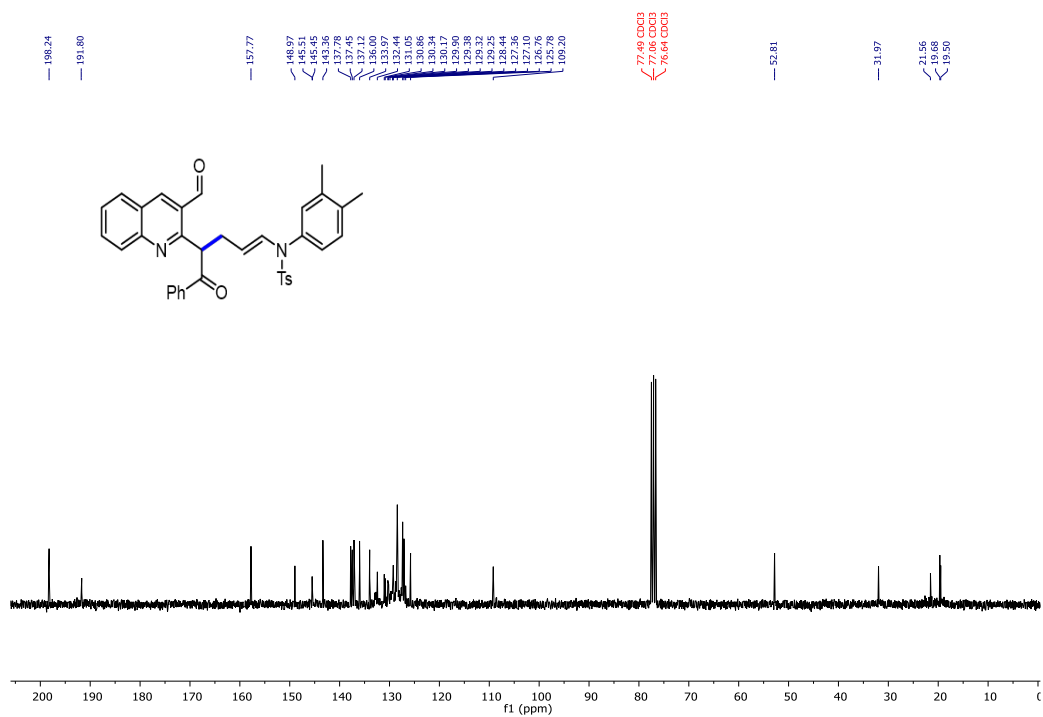

<sup>13</sup>C-NMR of compound **3i** (75 MHz, CDCl<sub>3</sub>)

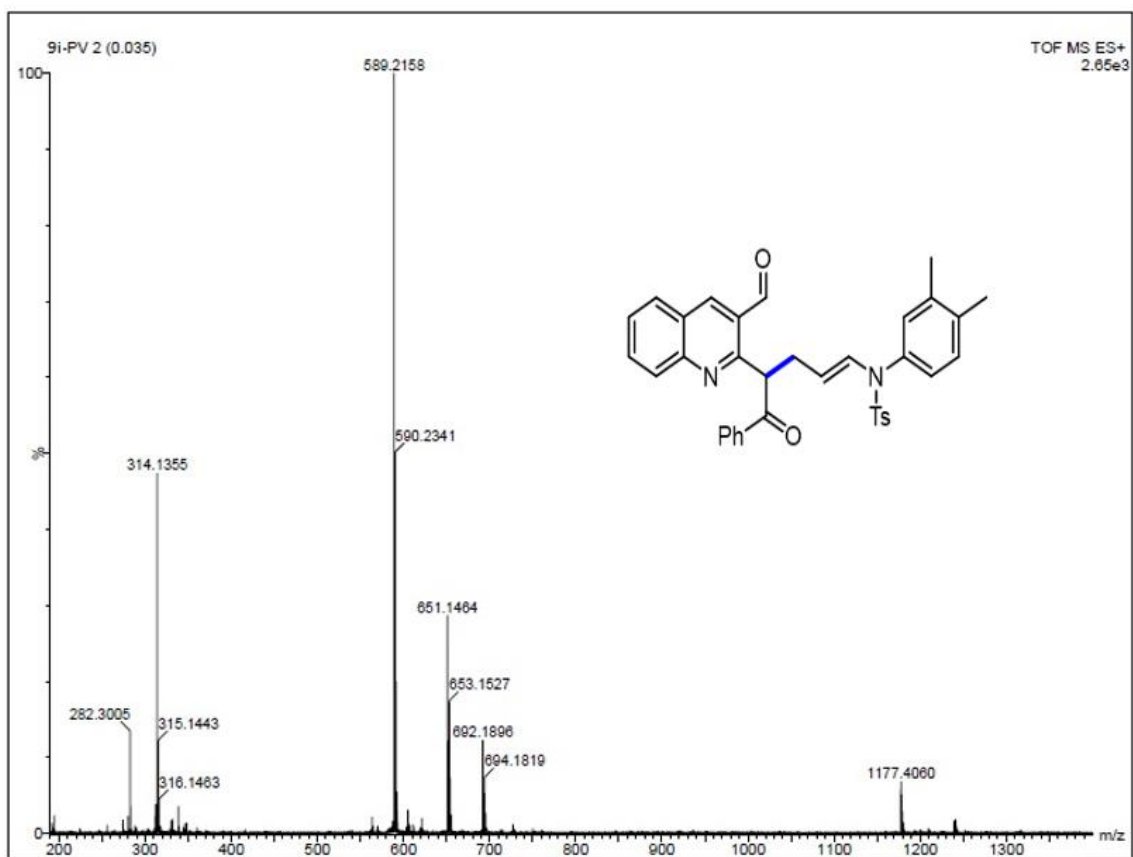

HRMS-ESI of **3i**:  $[M+H]^+$  calcd for  $C_{36}H_{32}N_2O_4S$  589.2155

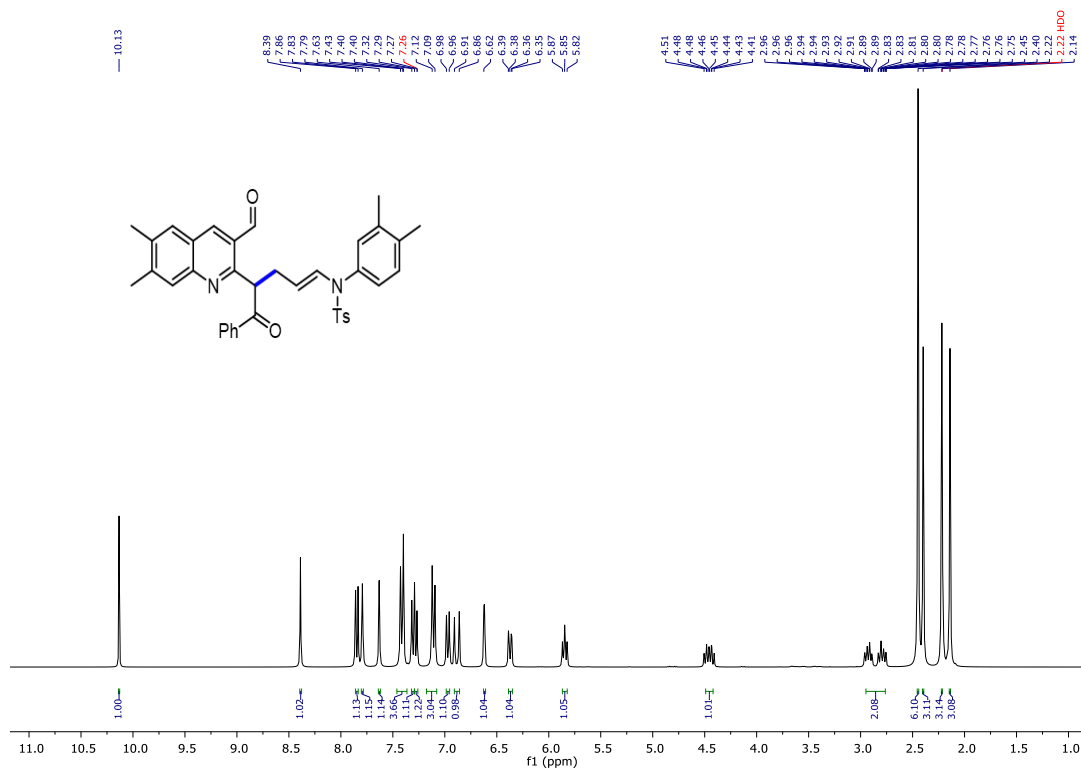

**<sup>1</sup>H-NMR of compound 3j (300MHz, CDCl<sub>3</sub>)**

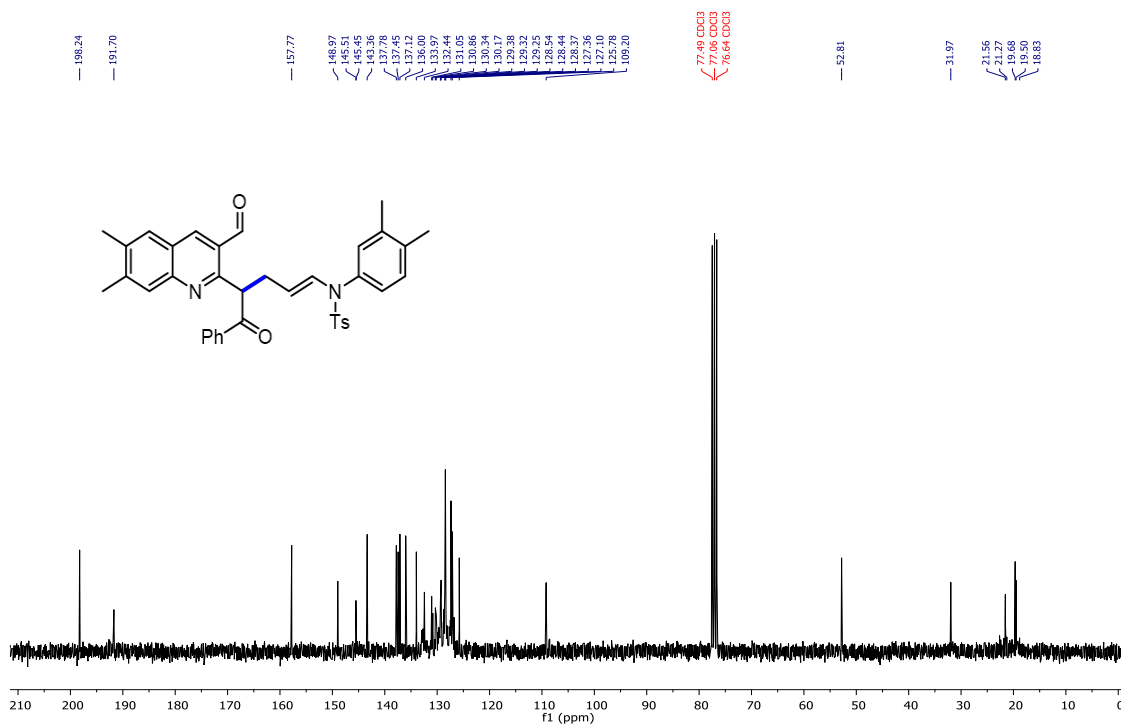

**<sup>13</sup>C-NMR of compound 3j (75 MHz, CDCl<sub>3</sub>)**



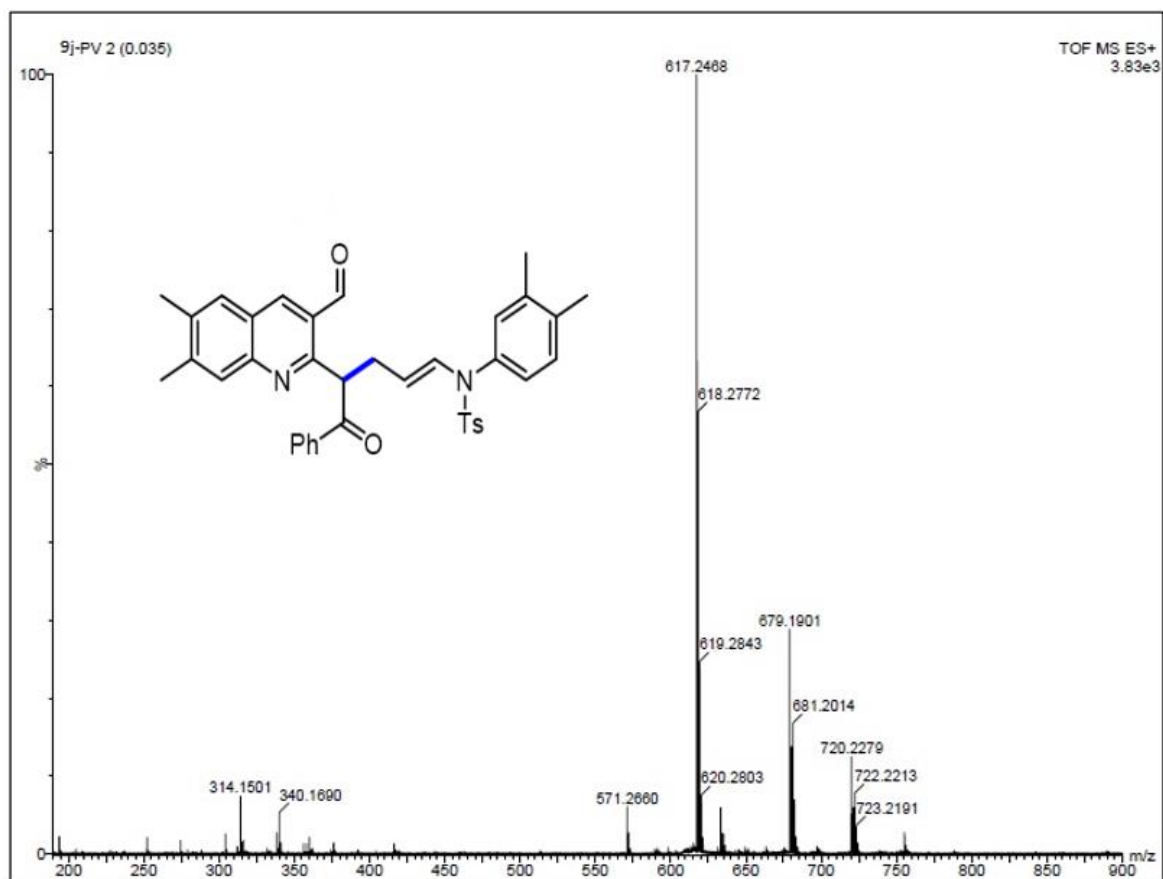

HRMS-ESI of **3j**:  $[M+H]^+$  calcd for  $C_{38}H_{37}N_2O_4S$  617.2461

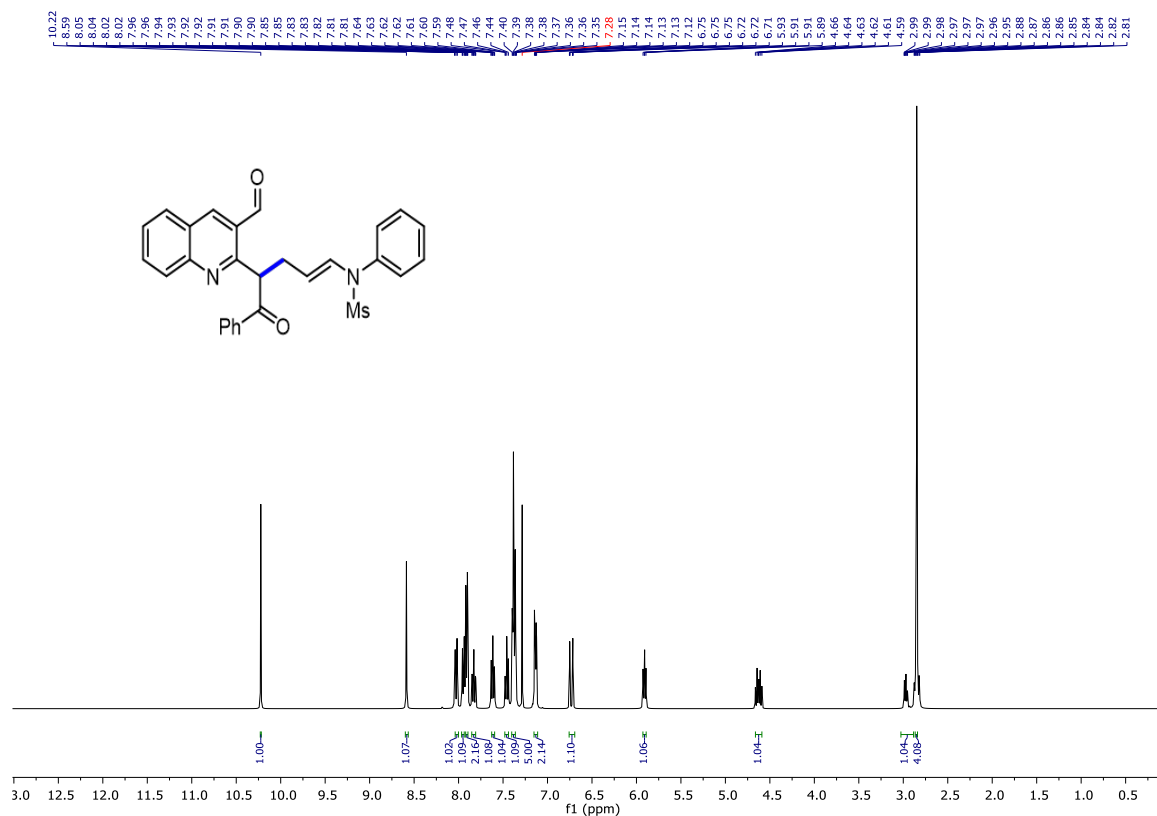

<sup>1</sup>H-NMR of compound **3k** (400MHz, CDCl<sub>3</sub>)

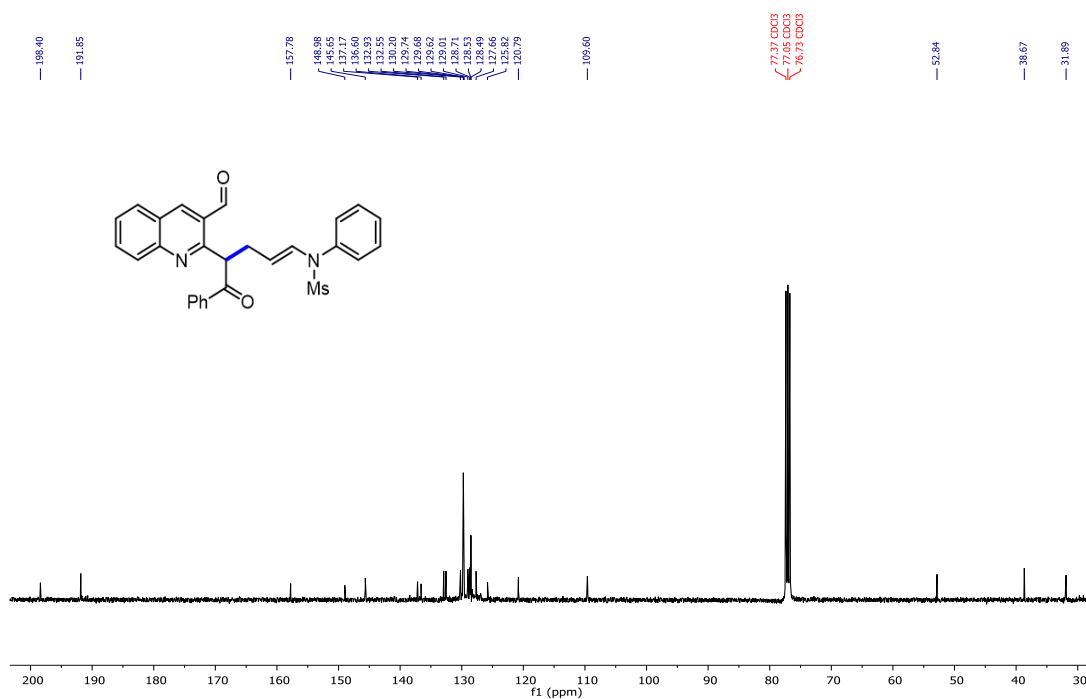

<sup>13</sup>C-NMR of compound **3k** (101 MHz, CDCl<sub>3</sub>)

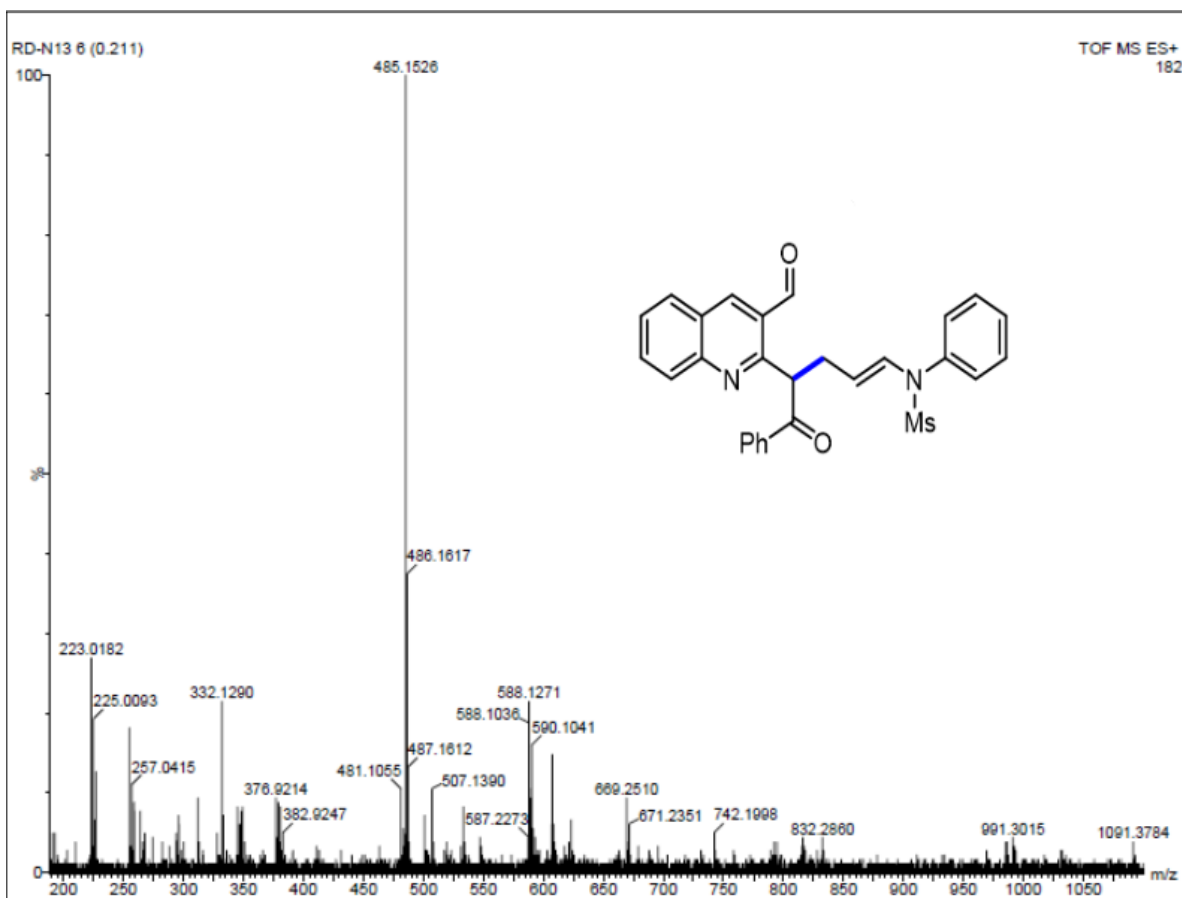

HRMS-ESI of **3k**:  $[M+H]^+$  calcd for  $C_{28}H_{25}N_2O_4S$  485.1524

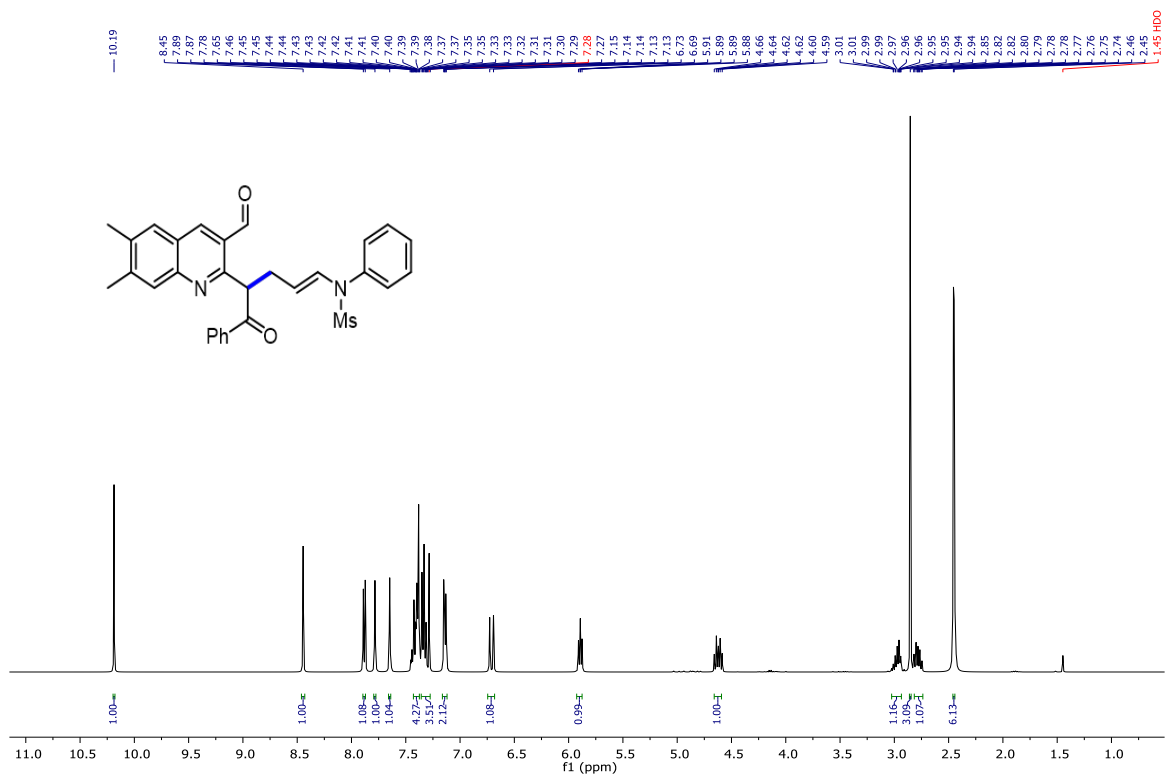

<sup>1</sup>H-NMR of compound **3I** (400MHz, CDCl<sub>3</sub>)

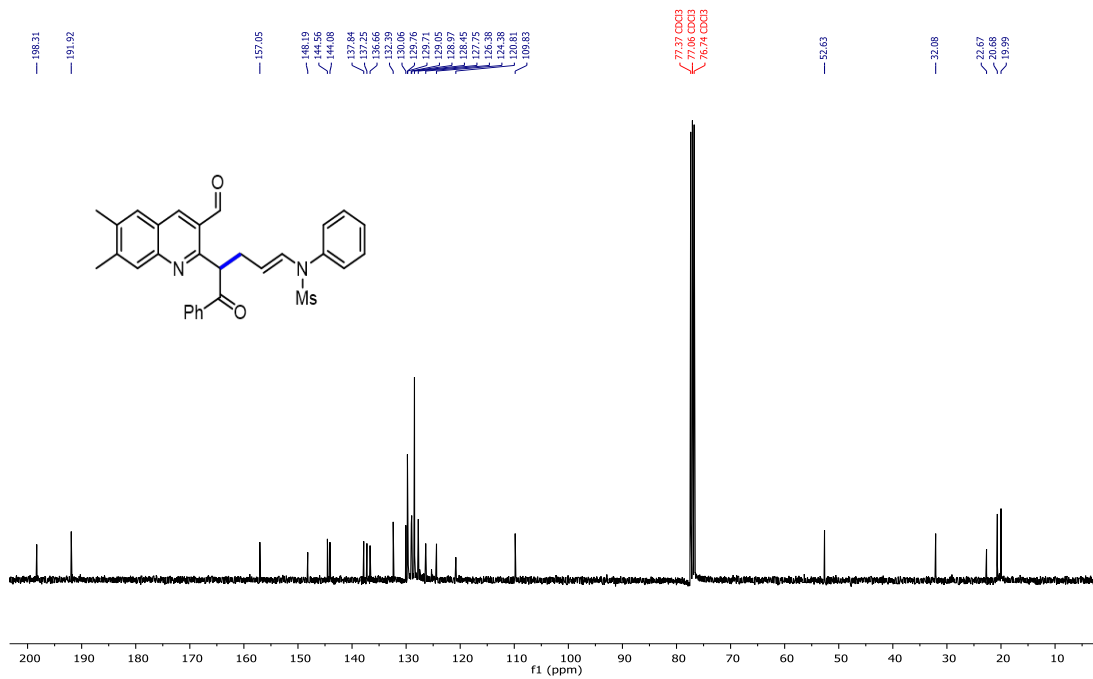

<sup>13</sup>C-NMR of compound **3I** (101 MHz, CDCl<sub>3</sub>)

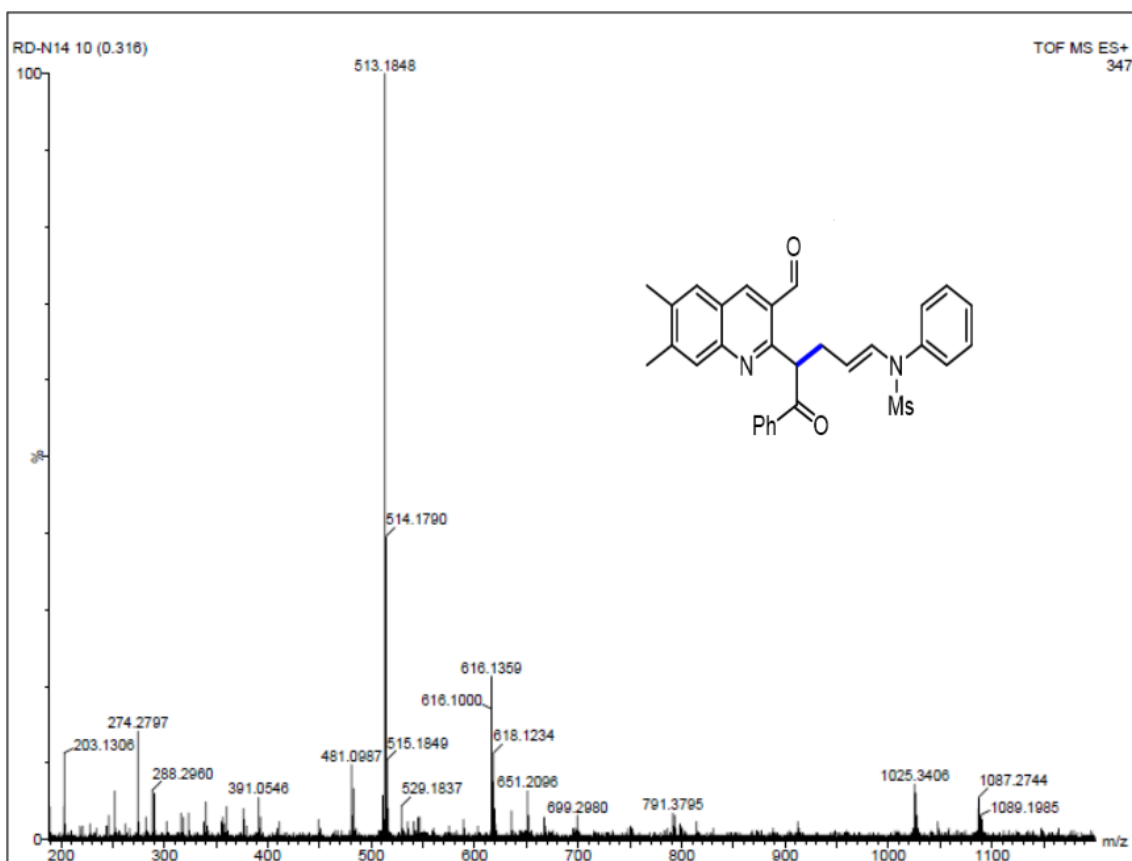

HRMS-ESI of **3l**:  $[M+H]^+$  calcd for  $C_{30}H_{28}N_2O_4S$  513.1845

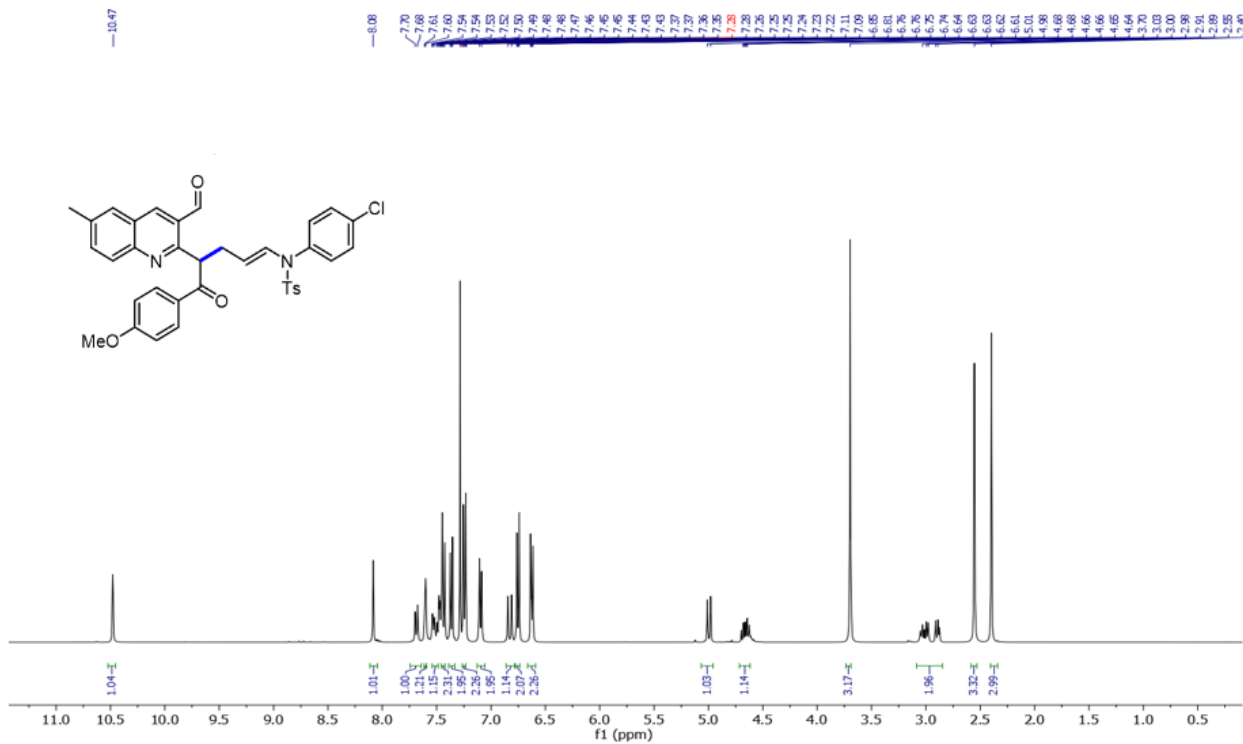

$^1\text{H-NMR}$  of compound **3m** (400MHz,  $\text{CDCl}_3$ )

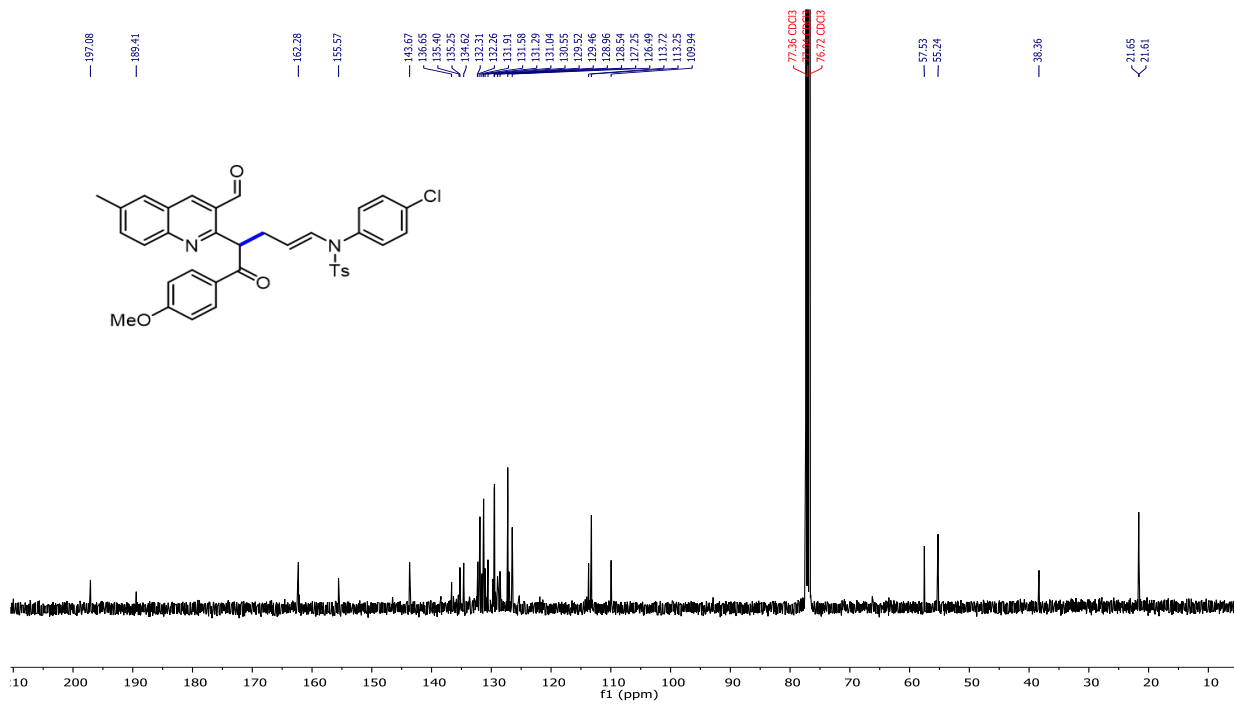

$^{13}\text{C-NMR}$  of compound **3m** (101 MHz,  $\text{CDCl}_3$ )

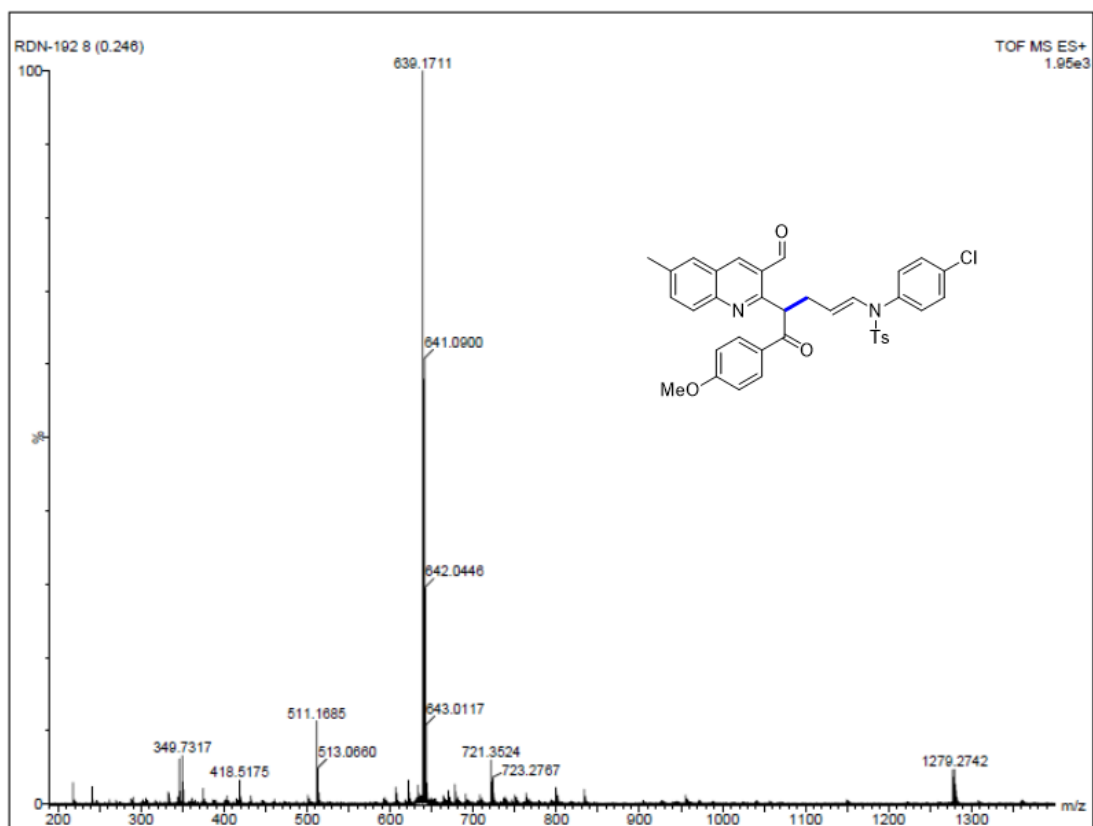

HRMS-ESI of **3m**:  $[M+H]^+$  calcd for  $C_{36}H_{32}^{35}ClN_2O_5S$  639.1707

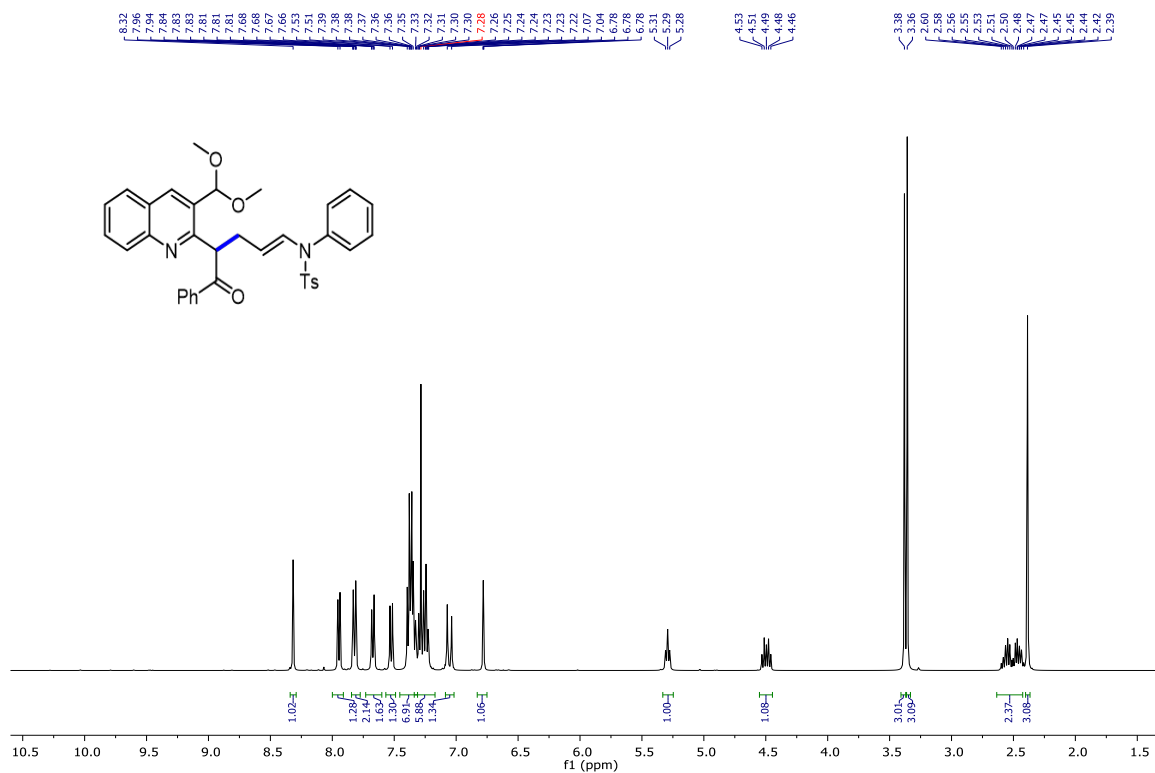

<sup>1</sup>H-NMR of compound **3n** (400MHz, CDCl<sub>3</sub>)

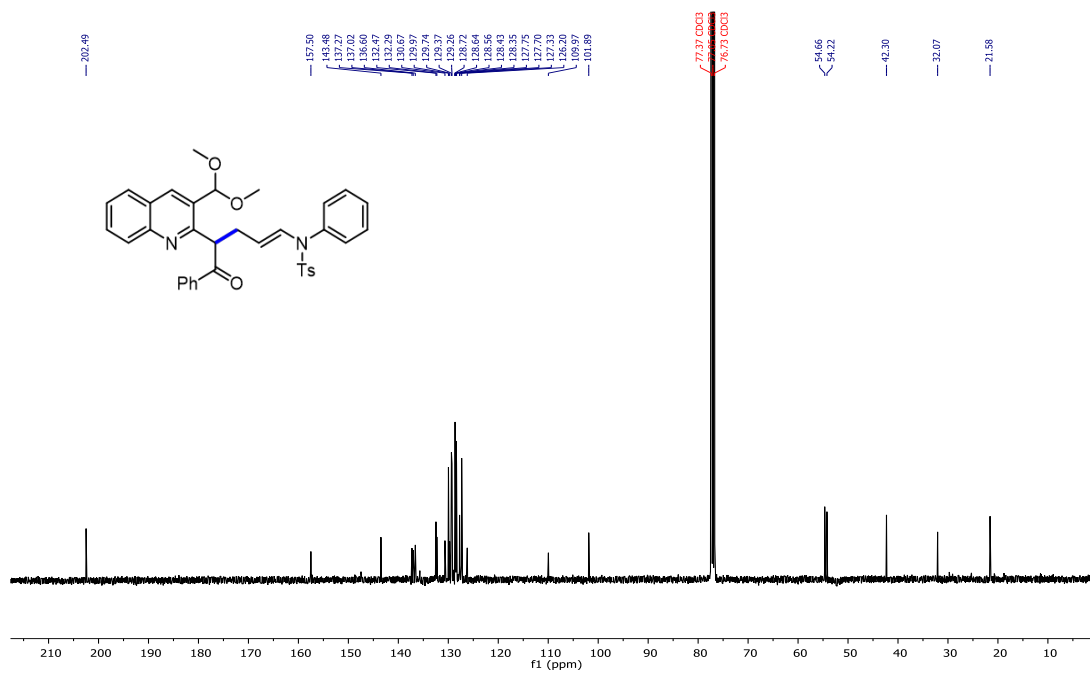

<sup>13</sup>C-NMR of compound **3n** (101 MHz, CDCl<sub>3</sub>)



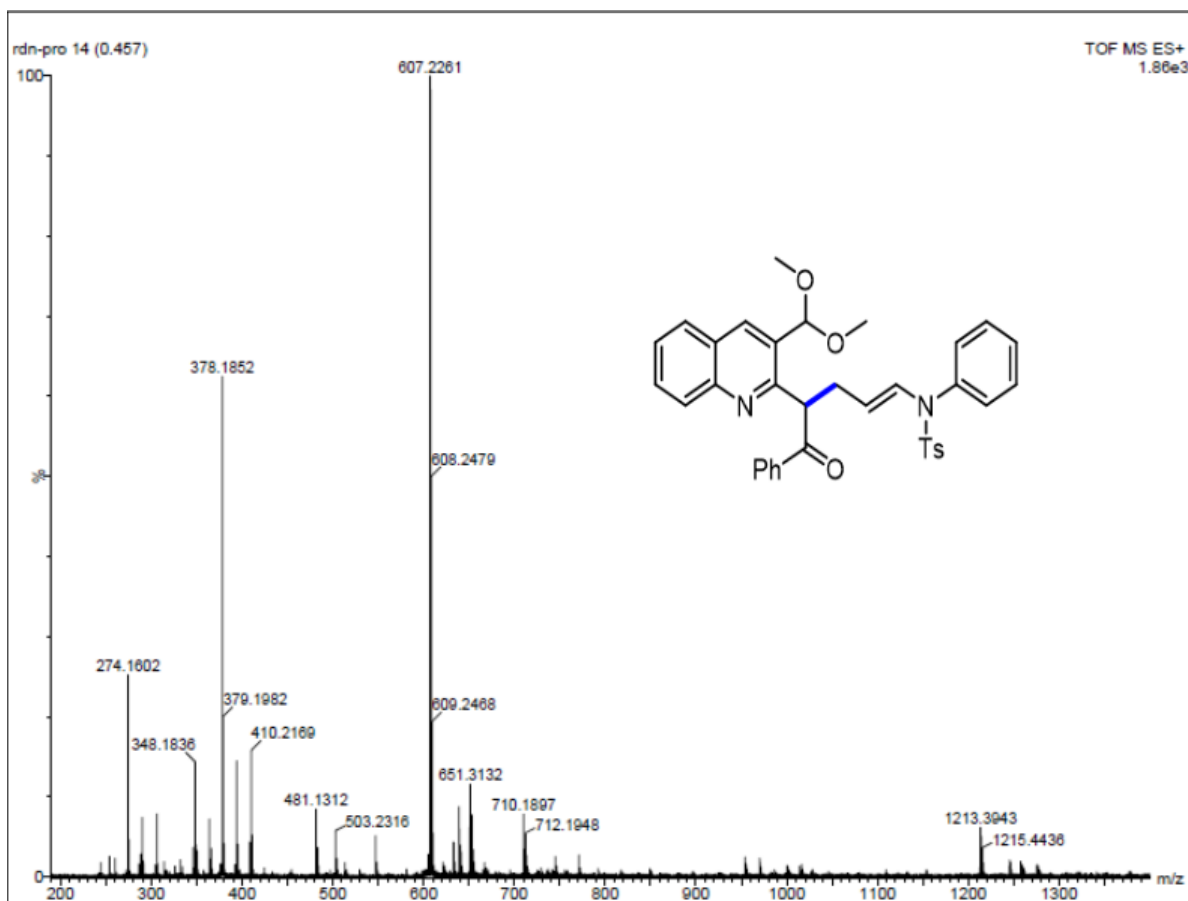

HRMS-ESI of **3n**:  $[M+H]^+$  calcd for  $C_{36}H_{35}N_2O_5S$  607.2255

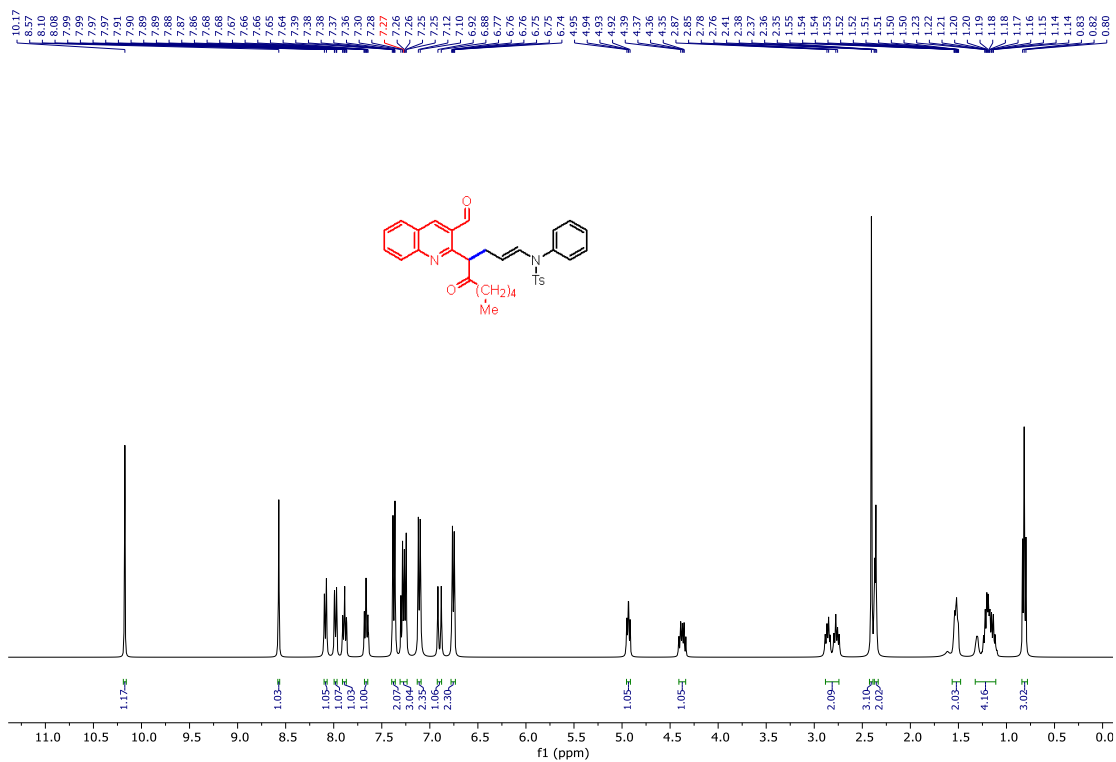

<sup>1</sup>H-NMR of compound **3o** (400 MHz, CDCl<sub>3</sub>)

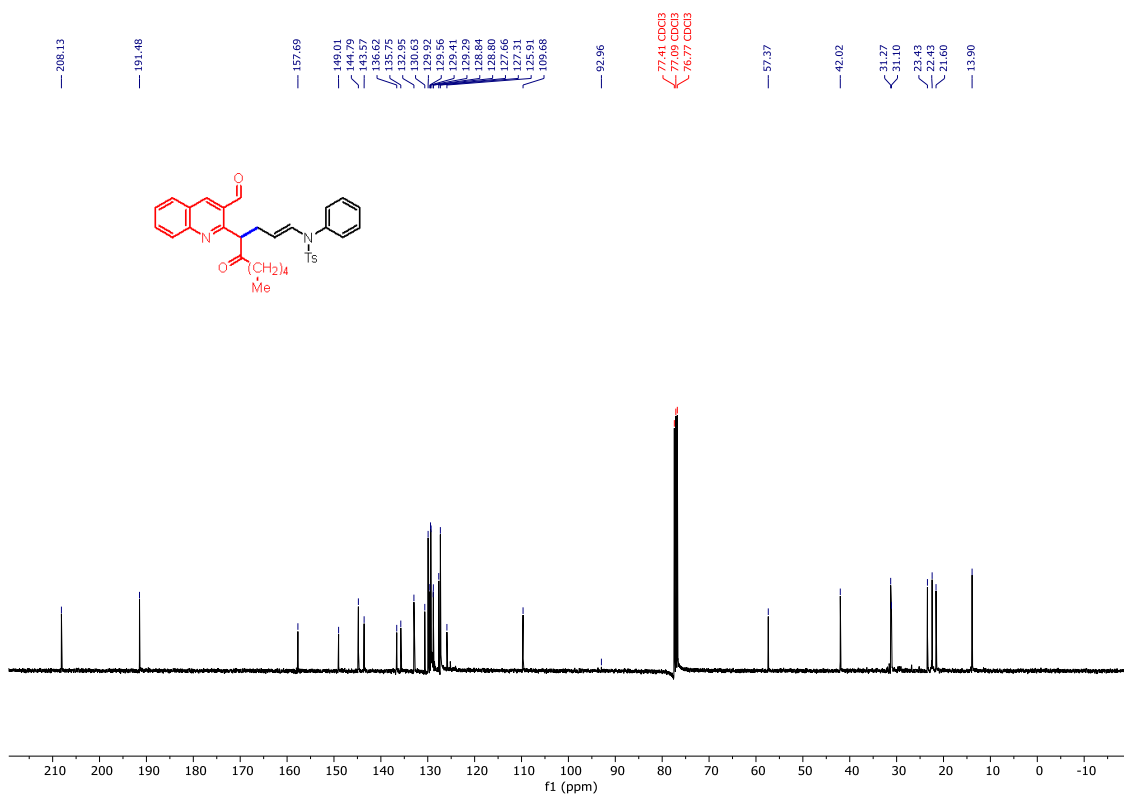

<sup>13</sup>C-NMR of compound **3o** (101 MHz, CDCl<sub>3</sub>)

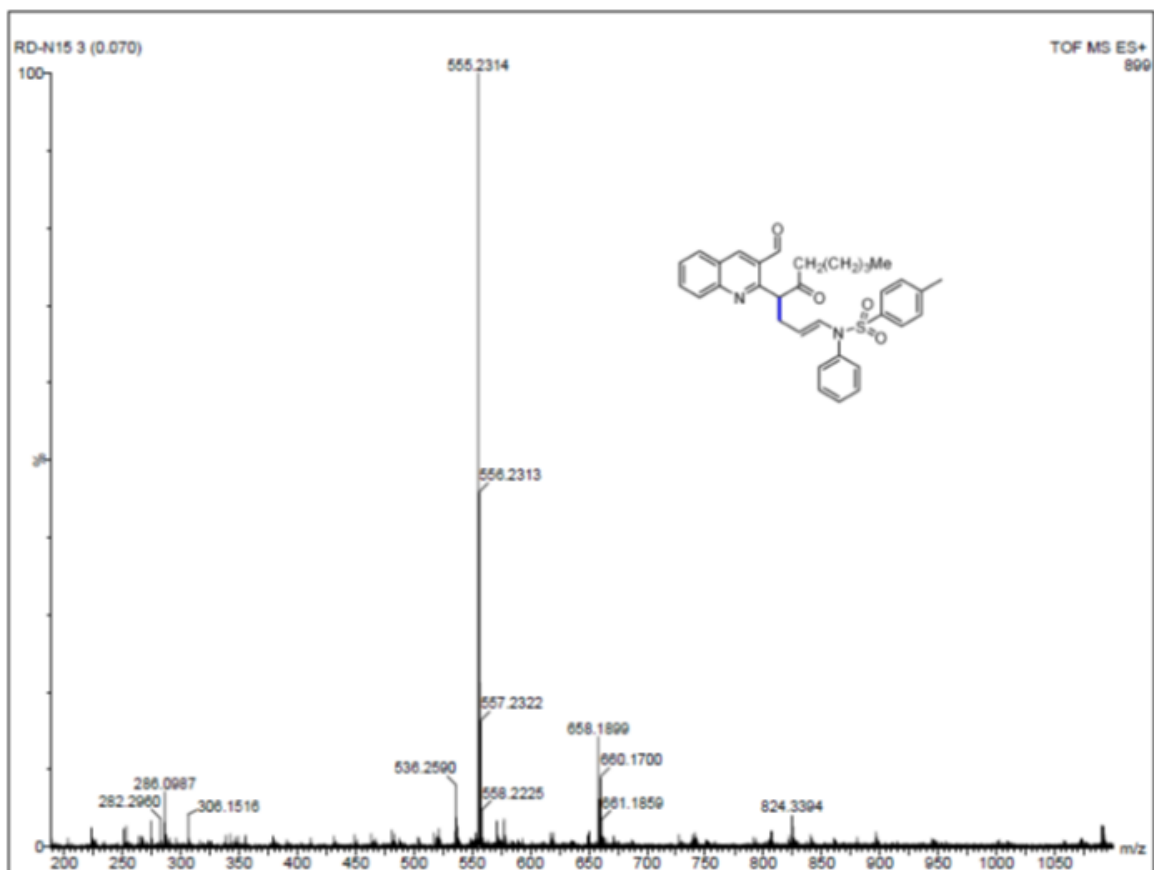

HRMS-ESI of **3o**:  $[M+H]^+$  calcd for  $C_{33}H_{35}N_2O_4S$  555.2310

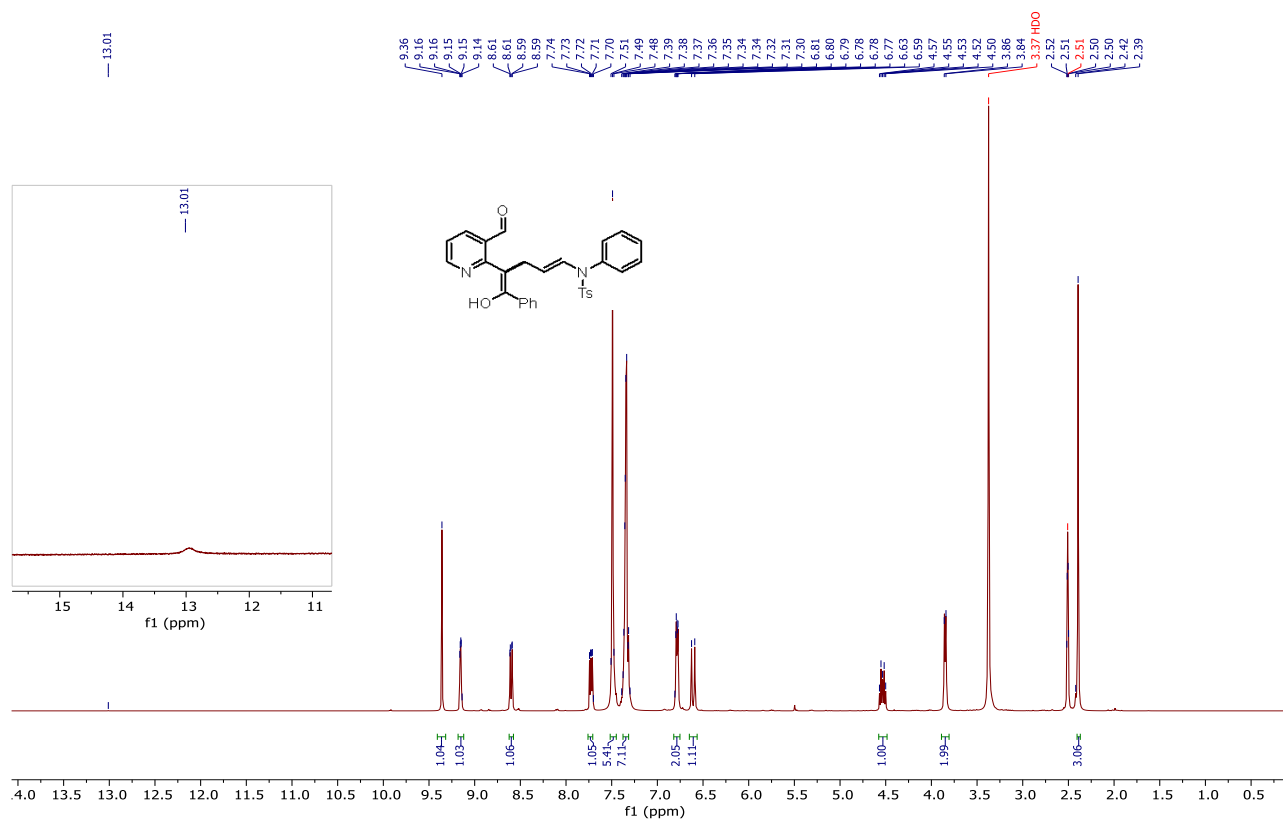

<sup>1</sup>H-NMR of compound **3p** (400 MHz, DMSO-*d*<sub>6</sub>)

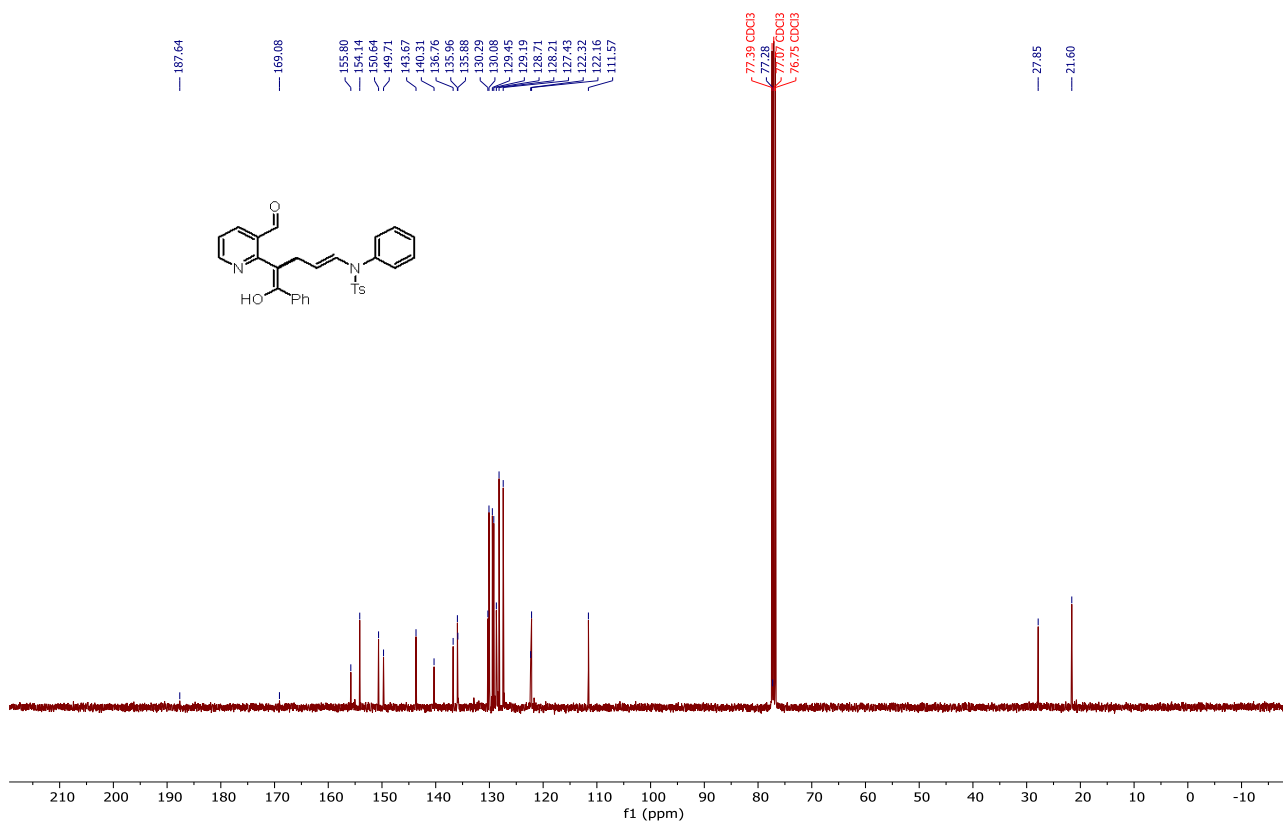

<sup>13</sup>C-NMR of compound **3p** (101 MHz, CDCl<sub>3</sub>)

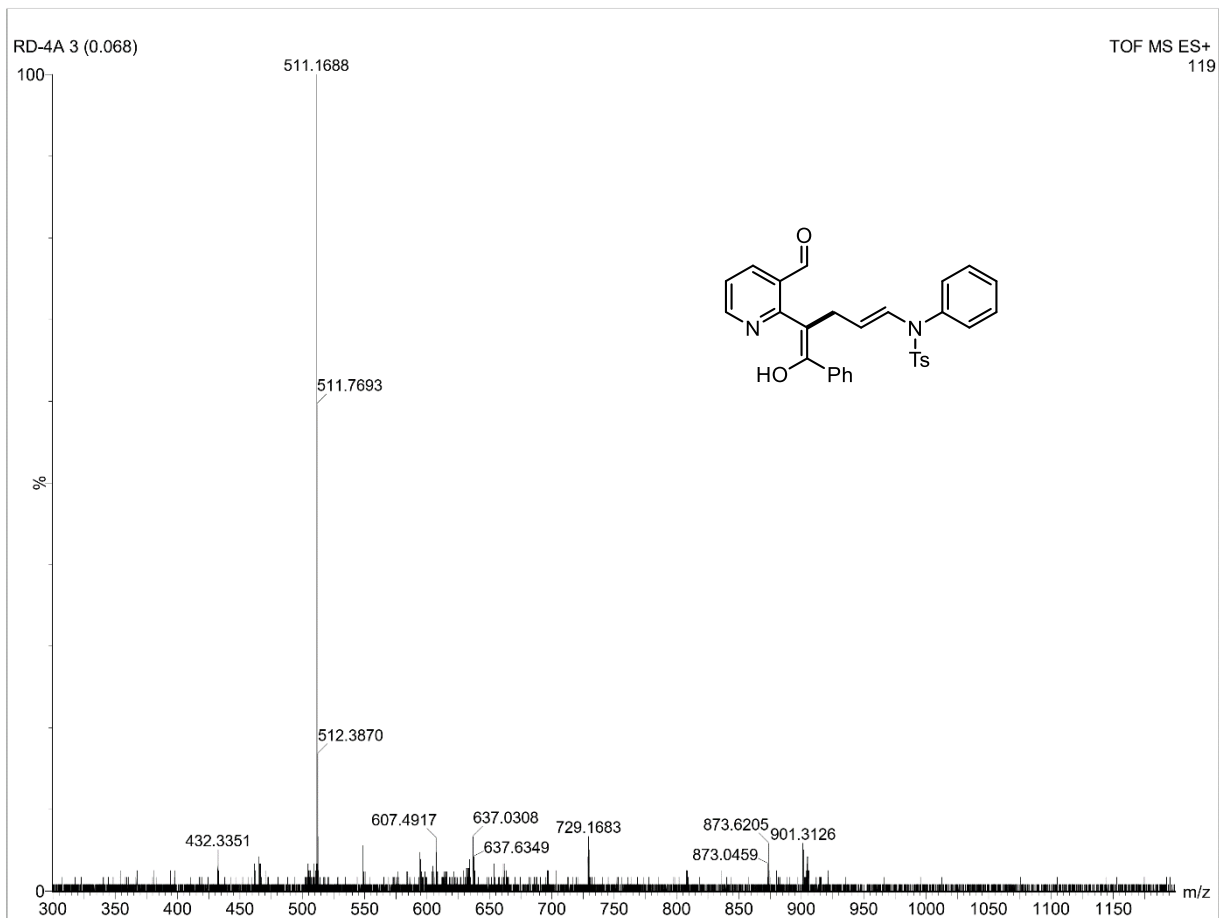

HRMS-ESI of **3p**:  $[M+H]^+$  calcd for  $C_{30}H_{27}N_2O_4S$  511.1683

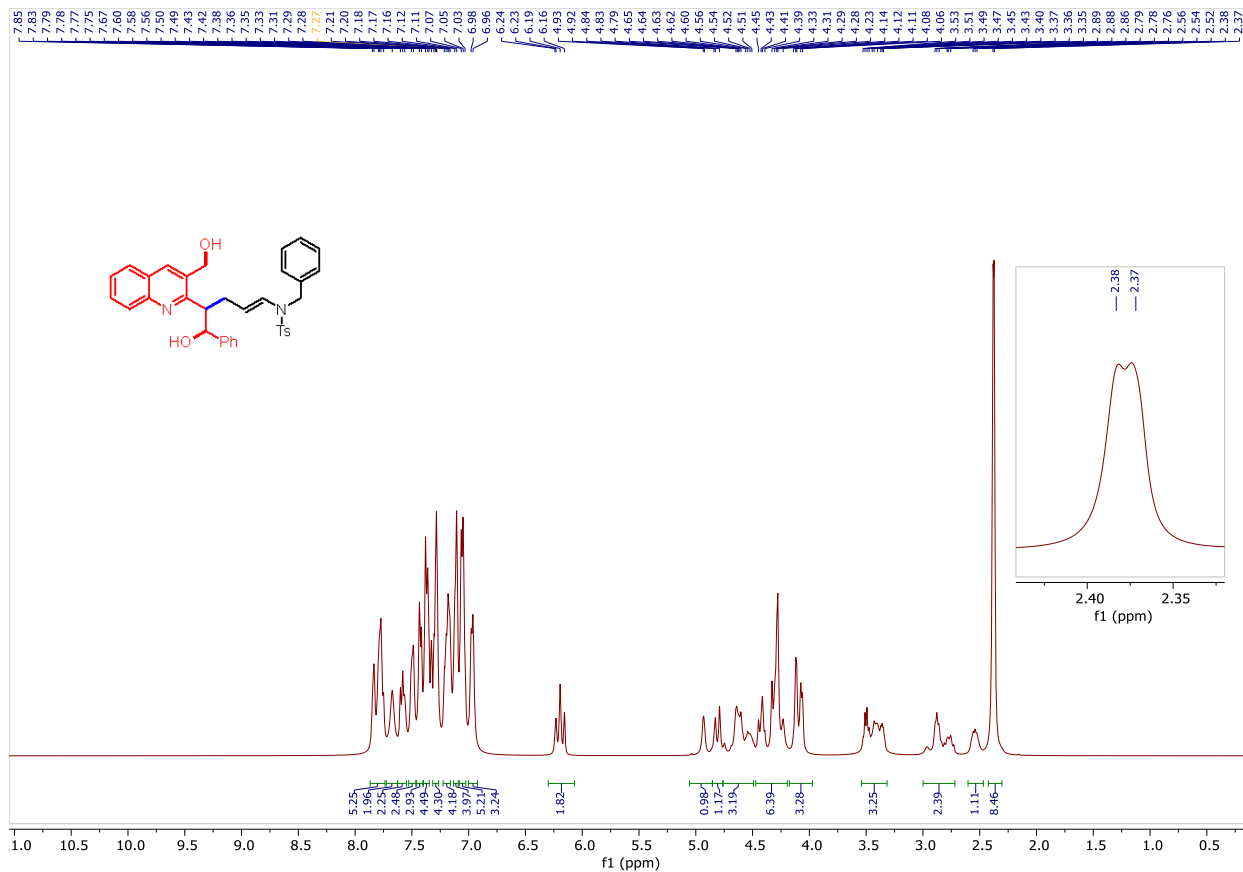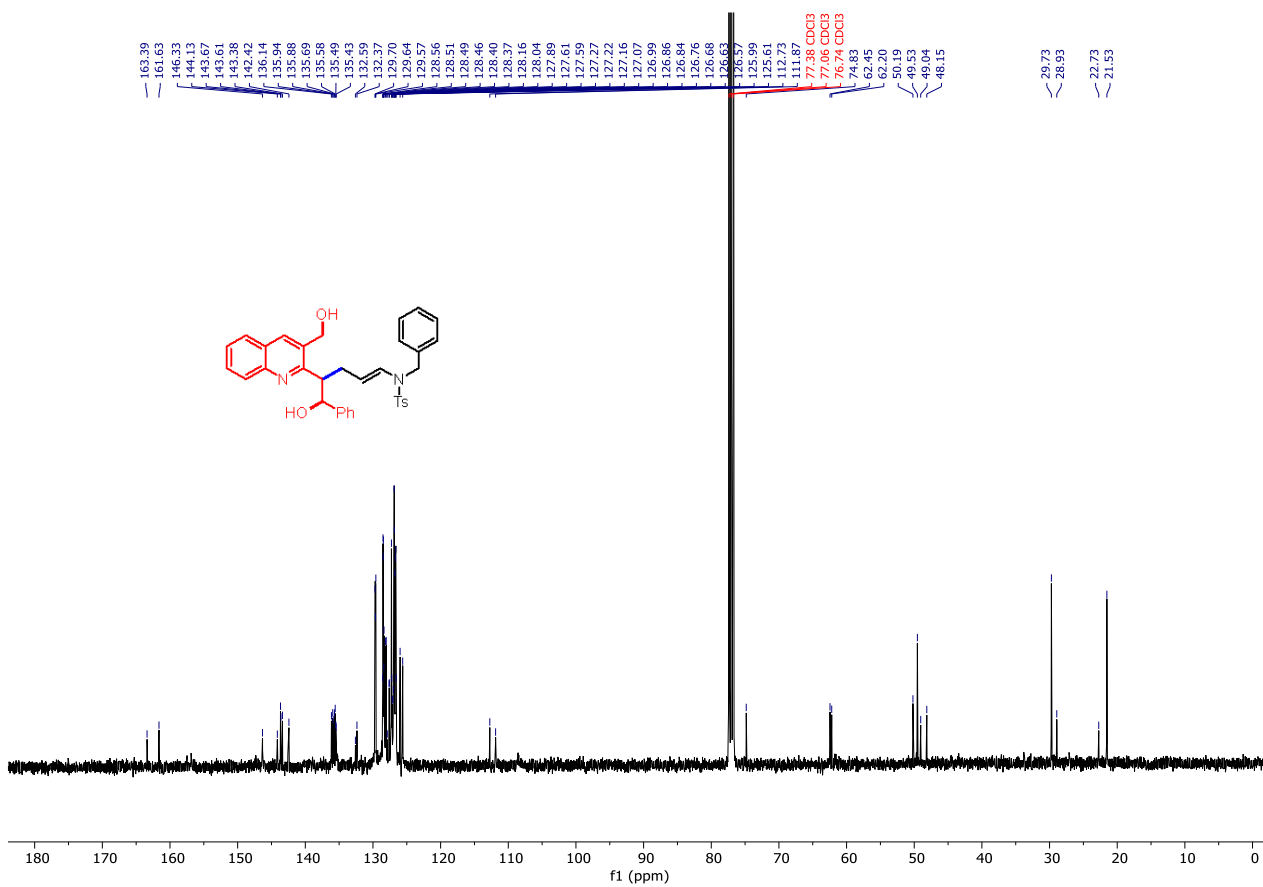

$^{13}\text{C}$ -NMR of compound **4a** (101MHz,  $\text{CDCl}_3$ ) (mixture of two diastereomers (50:50))

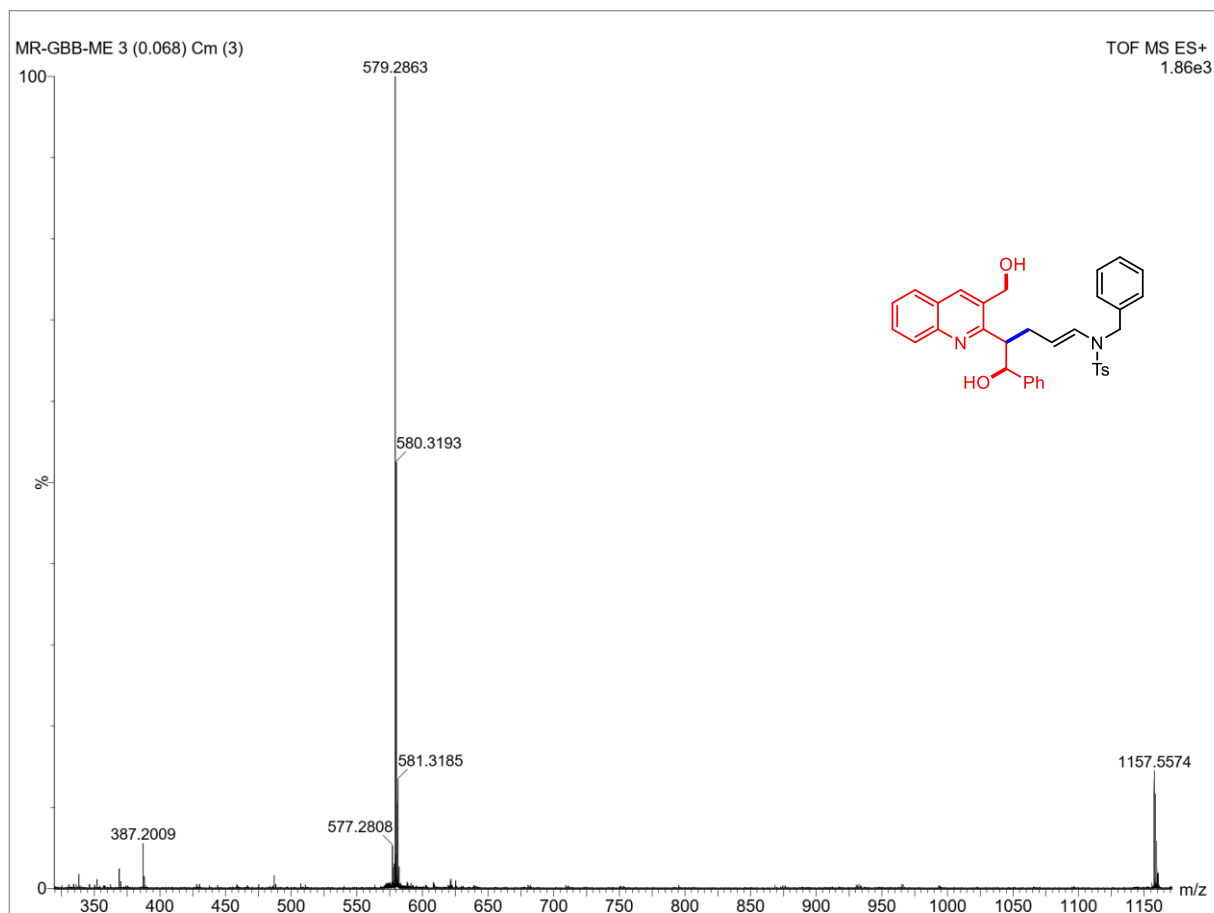

HRMS-ESI of **4a**:  $[\text{M}+\text{H}]^+$  calcd for  $\text{C}_{35}\text{H}_{35}\text{N}_2\text{O}_4\text{S}$  579.2861(mixture of two diastereomers (50:50))

## 4. X-ray Crystallographic Analysis

Crystal data and structure refinement for 3a.

Probe : 3a  
 Sample code : sba180  
 Operator : F. Rominger  
 Instrument : Bruker APEX-II Quazar area detector

Table 1: Crystal data and structure refinement for sba180.

|                                   |                                                                 |             |
|-----------------------------------|-----------------------------------------------------------------|-------------|
| Identification code               | 3a                                                              |             |
| Empirical formula                 | C <sub>34</sub> H <sub>28</sub> N <sub>2</sub> O <sub>4</sub> S |             |
| Formula weight                    | 560.64                                                          |             |
| Temperature                       | 200(2) K                                                        |             |
| Wavelength                        | 0.71073 Å                                                       |             |
| Crystal system                    | orthorhombic                                                    |             |
| Space group                       | Pbcn                                                            |             |
| Z                                 | 8                                                               |             |
| Unit cell dimensions              | a = 13.7850(6) Å                                                | ∠ = 90 deg. |
|                                   | b = 14.0217(7) Å                                                | ∠ = 90 deg. |
|                                   | c = 29.4717(13) Å                                               | ∠ = 90 deg. |
| Volume                            | 5696.6(5) Å <sup>3</sup>                                        |             |
| Density (calculated)              | 1.31 g/cm <sup>3</sup>                                          |             |
| Absorption coefficient            | 0.16 mm <sup>-1</sup>                                           |             |
| Crystal shape                     | brick                                                           |             |
| Crystal size                      | 0.168 x 0.077 x 0.063 mm <sup>3</sup>                           |             |
| Crystal colour                    | colourless                                                      |             |
| Theta range for data collection   | 1.4 to 27.1 deg.                                                |             |
| Index ranges                      | -17 ≤ h ≤ 16, -17 ≤ k ≤ 17, -35 ≤ l ≤ 37                        |             |
| Reflections collected             | 38791                                                           |             |
| Independent reflections           | 6215 (R(int) = 0.0840)                                          |             |
| Observed reflections              | 3596 (I > 2σ(I))                                                |             |
| Absorption correction             | Semi-empirical from equivalents                                 |             |
| Max. and min. transmission        | 0.96 and 0.92                                                   |             |
| Refinement method                 | Full-matrix least-squares on F <sup>2</sup>                     |             |
| Data/restraints/parameters        | 6215 / 0 / 371                                                  |             |
| Goodness-of-fit on F <sup>2</sup> | 1.01                                                            |             |
| Final R indices (I > 2σ(I))       | R1 = 0.054, wR2 = 0.105                                         |             |
| Largest diff. peak and hole       | 0.24 and -0.34 eÅ <sup>-3</sup>                                 |             |

Table 2: Atomic coordinates and equivalent isotropic displacement parameters (Å<sup>2</sup>) for sba180. U<sub>eq</sub> is defined as one third of the trace of the orthogonalized U<sub>ij</sub> tensor.

| Atom | x         | y         | z         | U <sub>eq</sub> |
|------|-----------|-----------|-----------|-----------------|
| C1   | 0.8667(2) | 0.8606(2) | 0.7555(1) | 0.0292(6)       |
| C2   | 0.8674(2) | 0.8004(2) | 0.7124(1) | 0.0266(5)       |
| H2   | 0.9149    | 0.7472    | 0.7166    | 0.032           |
| C3   | 0.8969(2) | 0.8577(2) | 0.6701(1) | 0.0276(6)       |



|     |           |           |           |           |
|-----|-----------|-----------|-----------|-----------|
| H3A | 0.8463    | 0.9058    | 0.6632    | 0.033     |
| H3B | 0.9584    | 0.8919    | 0.6761    | 0.033     |
| C4  | 0.9095(2) | 0.7929(2) | 0.6301(1) | 0.0295(6) |
| H4  | 0.9571    | 0.7441    | 0.6322    | 0.035     |
| C5  | 0.8591(2) | 0.7991(2) | 0.5923(1) | 0.0307(6) |
| H5  | 0.8113    | 0.8478    | 0.5904    | 0.037     |
| S1  | 0.7906(1) | 0.7434(1) | 0.5127(1) | 0.0385(2) |
| O1  | 0.8790(2) | 0.9462(1) | 0.7543(1) | 0.0484(5) |
| N11 | 0.8709(2) | 0.7380(1) | 0.5542(1) | 0.0335(5) |
| C11 | 0.8499(2) | 0.8116(2) | 0.8001(1) | 0.0295(6) |
| O12 | 0.8305(1) | 0.6902(2) | 0.4758(1) | 0.0487(5) |
| C12 | 0.8154(2) | 0.8657(2) | 0.8361(1) | 0.0404(7) |
| H12 | 0.8045    | 0.9321    | 0.8322    | 0.048     |
| O13 | 0.7670(1) | 0.8422(1) | 0.5074(1) | 0.0475(5) |
| C13 | 0.7968(2) | 0.8235(2) | 0.8776(1) | 0.0485(8) |
| H13 | 0.7717    | 0.8607    | 0.9018    | 0.058     |
| C14 | 0.8144(2) | 0.7280(2) | 0.8838(1) | 0.0500(8) |
| H14 | 0.8009    | 0.6991    | 0.9122    | 0.060     |
| C15 | 0.8514(2) | 0.6740(2) | 0.8489(1) | 0.0441(7) |
| H15 | 0.8657    | 0.6085    | 0.8536    | 0.053     |
| C16 | 0.8679(2) | 0.7152(2) | 0.8067(1) | 0.0350(6) |
| H16 | 0.8915    | 0.6773    | 0.7824    | 0.042     |
| C21 | 0.7671(2) | 0.7575(2) | 0.7059(1) | 0.0275(6) |
| N22 | 0.6968(1) | 0.8203(1) | 0.7026(1) | 0.0291(5) |
| C23 | 0.6028(2) | 0.7893(2) | 0.6965(1) | 0.0299(6) |
| C24 | 0.5283(2) | 0.8573(2) | 0.6936(1) | 0.0409(7) |
| H24 | 0.5433    | 0.9234    | 0.6951    | 0.049     |
| C25 | 0.4341(2) | 0.8285(2) | 0.6885(1) | 0.0471(8) |
| H25 | 0.3842    | 0.8750    | 0.6860    | 0.057     |
| C26 | 0.4102(2) | 0.7322(2) | 0.6870(1) | 0.0479(8) |
| H26 | 0.3442    | 0.7136    | 0.6838    | 0.057     |
| C27 | 0.4803(2) | 0.6643(2) | 0.6899(1) | 0.0428(7) |
| H27 | 0.4632    | 0.5986    | 0.6892    | 0.051     |
| C28 | 0.5791(2) | 0.6916(2) | 0.6940(1) | 0.0322(6) |
| C29 | 0.6556(2) | 0.6271(2) | 0.6968(1) | 0.0372(7) |
| H29 | 0.6423    | 0.5608    | 0.6949    | 0.045     |
| C30 | 0.7499(2) | 0.6568(2) | 0.7023(1) | 0.0317(6) |
| O31 | 0.9110(2) | 0.5915(1) | 0.7078(1) | 0.0507(5) |
| C31 | 0.8244(2) | 0.5817(2) | 0.7039(1) | 0.0441(7) |
| H31 | 0.8017    | 0.5179    | 0.7017    | 0.053     |
| C41 | 0.9212(2) | 0.6480(2) | 0.5605(1) | 0.0339(6) |
| C42 | 0.8808(2) | 0.5781(2) | 0.5875(1) | 0.0410(7) |
| H42 | 0.8199    | 0.5880    | 0.6018    | 0.049     |
| C43 | 0.9306(2) | 0.4930(2) | 0.5933(1) | 0.0517(8) |
| H43 | 0.9034    | 0.4441    | 0.6117    | 0.062     |
| C44 | 1.0189(3) | 0.4788(2) | 0.5728(1) | 0.0562(9) |
| H44 | 1.0525    | 0.4203    | 0.5771    | 0.067     |
| C45 | 1.0587(2) | 0.5489(2) | 0.5460(1) | 0.0547(9) |
| H45 | 1.1195    | 0.5388    | 0.5316    | 0.066     |
| C46 | 1.0098(2) | 0.6347(2) | 0.5399(1) | 0.0446(7) |
| H46 | 1.0373    | 0.6837    | 0.5218    | 0.054     |
| C51 | 0.6863(2) | 0.6843(2) | 0.5317(1) | 0.0349(6) |
| C52 | 0.6747(2) | 0.5873(2) | 0.5237(1) | 0.0454(7) |
| H52 | 0.7226    | 0.5529    | 0.5073    | 0.054     |
| C53 | 0.5929(2) | 0.5412(2) | 0.5399(1) | 0.0490(8) |
| H53 | 0.5853    | 0.4748    | 0.5346    | 0.059     |
| C54 | 0.5221(2) | 0.5900(2) | 0.5637(1) | 0.0477(8) |
| C55 | 0.5347(2) | 0.6864(2) | 0.5715(1) | 0.0494(8) |
| H55 | 0.4867    | 0.7208    | 0.5880    | 0.059     |

|      |           |           |           |            |
|------|-----------|-----------|-----------|------------|
| C56  | 0.6162(2) | 0.7337(2) | 0.5557(1) | 0.0416(7)  |
| H56  | 0.6239    | 0.8000    | 0.5614    | 0.050      |
| C58  | 0.4324(3) | 0.5397(3) | 0.5805(1) | 0.0709(11) |
| H58A | 0.4232    | 0.5535    | 0.6128    | 0.106      |
| H58B | 0.4399    | 0.4707    | 0.5763    | 0.106      |
| H58C | 0.3758    | 0.5620    | 0.5634    | 0.106      |

Table 3: Hydrogen coordinates and isotropic displacement parameters ( $\text{\AA}^2$ ) for sba180.

| Atom | x      | y      | z      | $U_{\text{eq}}$ |
|------|--------|--------|--------|-----------------|
| H2   | 0.9149 | 0.7472 | 0.7166 | 0.032           |
| H3A  | 0.8463 | 0.9058 | 0.6632 | 0.033           |
| H3B  | 0.9584 | 0.8919 | 0.6761 | 0.033           |
| H4   | 0.9571 | 0.7441 | 0.6322 | 0.035           |
| H5   | 0.8113 | 0.8478 | 0.5904 | 0.037           |
| H12  | 0.8045 | 0.9321 | 0.8322 | 0.048           |
| H13  | 0.7717 | 0.8607 | 0.9018 | 0.058           |
| H14  | 0.8009 | 0.6991 | 0.9122 | 0.060           |
| H15  | 0.8657 | 0.6085 | 0.8536 | 0.053           |
| H16  | 0.8915 | 0.6773 | 0.7824 | 0.042           |
| H24  | 0.5433 | 0.9234 | 0.6951 | 0.049           |
| H25  | 0.3842 | 0.8750 | 0.6860 | 0.057           |
| H26  | 0.3442 | 0.7136 | 0.6838 | 0.057           |
| H27  | 0.4632 | 0.5986 | 0.6892 | 0.051           |
| H29  | 0.6423 | 0.5608 | 0.6949 | 0.045           |
| H31  | 0.8017 | 0.5179 | 0.7017 | 0.053           |
| H42  | 0.8199 | 0.5880 | 0.6018 | 0.049           |
| H43  | 0.9034 | 0.4441 | 0.6117 | 0.062           |
| H44  | 1.0525 | 0.4203 | 0.5771 | 0.067           |
| H45  | 1.1195 | 0.5388 | 0.5316 | 0.066           |
| H46  | 1.0373 | 0.6837 | 0.5218 | 0.054           |
| H52  | 0.7226 | 0.5529 | 0.5073 | 0.054           |
| H53  | 0.5853 | 0.4748 | 0.5346 | 0.059           |
| H55  | 0.4867 | 0.7208 | 0.5880 | 0.059           |
| H56  | 0.6239 | 0.8000 | 0.5614 | 0.050           |
| H58A | 0.4232 | 0.5535 | 0.6128 | 0.106           |
| H58B | 0.4399 | 0.4707 | 0.5763 | 0.106           |
| H58C | 0.3758 | 0.5620 | 0.5634 | 0.106           |

Table 4: Anisotropic displacement parameters ( $\text{\AA}^2$ ) for sba180. The anisotropic displacement factor exponent takes the form:  $-2 \pi^2 (h^2 a^{*2} U_{11} + \dots + 2 h k a^* b^* U_{12})$

| Atom | $U_{11}$   | $U_{22}$   | $U_{33}$   | $U_{23}$    | $U_{13}$    | $U_{12}$    |
|------|------------|------------|------------|-------------|-------------|-------------|
| C1   | 0.0245(13) | 0.0322(14) | 0.0308(14) | -0.0043(11) | -0.0036(11) | -0.0014(11) |
| C2   | 0.0281(14) | 0.0254(12) | 0.0261(13) | 0.0005(10)  | -0.0007(11) | -0.0017(11) |
| C3   | 0.0274(14) | 0.0304(13) | 0.0251(13) | -0.0005(10) | -0.0013(11) | -0.0031(11) |
| C4   | 0.0270(14) | 0.0332(13) | 0.0282(14) | -0.0005(11) | 0.0010(11)  | 0.0026(11)  |
| C5   | 0.0330(15) | 0.0302(13) | 0.0290(14) | 0.0002(11)  | -0.0006(12) | 0.0024(11)  |
| S1   | 0.0446(4)  | 0.0454(4)  | 0.0256(4)  | 0.0011(3)   | -0.0066(3)  | 0.0011(3)   |

|     |            |            |            |             |             |             |
|-----|------------|------------|------------|-------------|-------------|-------------|
| O1  | 0.0761(15) | 0.0320(10) | 0.0370(11) | -0.0064(9)  | -0.0028(10) | -0.0107(10) |
| N11 | 0.0406(13) | 0.0369(12) | 0.0231(11) | -0.0012(9)  | -0.0062(10) | 0.0034(10)  |
| C11 | 0.0230(14) | 0.0405(15) | 0.0251(14) | -0.0020(11) | -0.0031(11) | -0.0055(11) |
| O12 | 0.0514(12) | 0.0719(14) | 0.0228(10) | -0.0085(9)  | -0.0041(9)  | 0.0029(11)  |
| C12 | 0.0339(16) | 0.0530(17) | 0.0342(16) | -0.0072(13) | -0.0023(13) | -0.0063(14) |
| O13 | 0.0591(13) | 0.0424(11) | 0.0409(12) | 0.0117(9)   | -0.0130(10) | -0.0003(10) |
| C13 | 0.0377(17) | 0.078(2)   | 0.0301(16) | -0.0099(15) | 0.0037(13)  | -0.0089(16) |
| C14 | 0.0420(18) | 0.079(2)   | 0.0293(16) | 0.0123(16)  | -0.0011(14) | -0.0056(17) |
| C15 | 0.0374(17) | 0.0534(18) | 0.0413(18) | 0.0157(14)  | -0.0073(14) | -0.0017(14) |
| C16 | 0.0304(15) | 0.0449(16) | 0.0298(15) | 0.0025(12)  | -0.0047(12) | -0.0013(13) |
| C21 | 0.0326(15) | 0.0293(13) | 0.0205(12) | -0.0011(10) | -0.0001(11) | -0.0003(11) |
| N22 | 0.0276(12) | 0.0289(11) | 0.0308(12) | 0.0002(9)   | -0.0004(9)  | -0.0024(9)  |
| C23 | 0.0289(14) | 0.0358(14) | 0.0249(14) | -0.0006(11) | -0.0004(11) | -0.0071(12) |
| C24 | 0.0304(16) | 0.0428(16) | 0.0495(18) | 0.0003(13)  | -0.0008(13) | -0.0015(13) |
| C25 | 0.0296(16) | 0.0588(19) | 0.053(2)   | 0.0020(15)  | -0.0016(14) | -0.0019(14) |
| C26 | 0.0321(16) | 0.071(2)   | 0.0404(18) | 0.0019(15)  | -0.0017(14) | -0.0150(16) |
| C27 | 0.0452(18) | 0.0500(17) | 0.0332(16) | 0.0010(13)  | -0.0054(14) | -0.0250(15) |
| C28 | 0.0343(15) | 0.0378(15) | 0.0244(14) | 0.0024(11)  | -0.0035(12) | -0.0082(12) |
| C29 | 0.0480(18) | 0.0305(14) | 0.0331(15) | 0.0005(12)  | -0.0035(13) | -0.0140(13) |
| C30 | 0.0410(16) | 0.0254(13) | 0.0287(14) | 0.0001(11)  | -0.0016(12) | -0.0035(12) |
| O31 | 0.0476(13) | 0.0351(11) | 0.0695(15) | -0.0054(10) | -0.0052(11) | 0.0062(10)  |
| C31 | 0.058(2)   | 0.0269(14) | 0.0472(19) | -0.0020(12) | -0.0045(16) | -0.0010(14) |
| C41 | 0.0395(16) | 0.0382(15) | 0.0238(14) | -0.0046(11) | -0.0048(12) | 0.0009(13)  |
| C42 | 0.0488(18) | 0.0430(16) | 0.0313(16) | -0.0031(13) | -0.0023(14) | -0.0005(14) |
| C43 | 0.074(2)   | 0.0359(16) | 0.0449(19) | -0.0026(14) | -0.0150(18) | -0.0011(16) |
| C44 | 0.072(2)   | 0.0453(18) | 0.051(2)   | -0.0182(16) | -0.0193(19) | 0.0193(18)  |
| C45 | 0.051(2)   | 0.064(2)   | 0.049(2)   | -0.0227(17) | -0.0040(16) | 0.0158(17)  |
| C46 | 0.0441(18) | 0.0550(18) | 0.0348(17) | -0.0091(14) | -0.0005(14) | -0.0014(15) |
| C51 | 0.0398(16) | 0.0362(14) | 0.0288(14) | -0.0016(12) | -0.0095(13) | 0.0044(13)  |
| C52 | 0.0432(18) | 0.0438(17) | 0.0491(19) | -0.0135(14) | -0.0125(15) | 0.0060(14)  |
| C53 | 0.056(2)   | 0.0395(16) | 0.051(2)   | -0.0039(14) | -0.0141(17) | -0.0023(15) |
| C54 | 0.0504(19) | 0.0557(19) | 0.0369(17) | 0.0066(15)  | -0.0082(15) | -0.0098(16) |
| C55 | 0.054(2)   | 0.0551(19) | 0.0390(18) | -0.0021(15) | 0.0075(15)  | 0.0051(16)  |
| C56 | 0.0526(19) | 0.0362(15) | 0.0360(16) | -0.0012(12) | -0.0026(14) | 0.0053(14)  |
| C58 | 0.072(2)   | 0.087(3)   | 0.053(2)   | 0.0030(19)  | 0.0019(19)  | -0.029(2)   |

Table 5: Bond lengths (Å) and angles (deg) for sba180.

|         |            |         |          |
|---------|------------|---------|----------|
| C1-O1   | 1.213(3)   | C11-C12 | 1.389(3) |
| C1-C11  | 1.502(3)   | C12-C13 | 1.381(4) |
| C1-C2   | 1.523(3)   | C12-H12 | 0.9500   |
| C2-C21  | 1.520(3)   | C13-C14 | 1.374(4) |
| C2-C3   | 1.540(3)   | C13-H13 | 0.9500   |
| C2-H2   | 1.0000     | C14-C15 | 1.375(4) |
| C3-C4   | 1.498(3)   | C14-H14 | 0.9500   |
| C3-H3A  | 0.9900     | C15-C16 | 1.389(4) |
| C3-H3B  | 0.9900     | C15-H15 | 0.9500   |
| C4-C5   | 1.315(3)   | C16-H16 | 0.9500   |
| C4-H4   | 0.9500     | C21-N22 | 1.313(3) |
| C5-N11  | 1.422(3)   | C21-C30 | 1.436(3) |
| C5-H5   | 0.9500     | N22-C23 | 1.378(3) |
| S1-O12  | 1.4277(19) | C23-C24 | 1.404(4) |
| S1-O13  | 1.4304(19) | C23-C28 | 1.411(3) |
| S1-N11  | 1.653(2)   | C24-C25 | 1.368(4) |
| S1-C51  | 1.753(3)   | C24-H24 | 0.9500   |
| N11-C41 | 1.451(3)   | C25-C26 | 1.391(4) |
| C11-C16 | 1.388(3)   | C25-H25 | 0.9500   |

|            |            |             |            |
|------------|------------|-------------|------------|
| C26-C27    | 1.359(4)   | C5-N11-C41  | 118.55(19) |
| C26-H26    | 0.9500     | C5-N11-S1   | 118.72(17) |
| C27-C28    | 1.420(4)   | C41-N11-S1  | 117.03(16) |
| C27-H27    | 0.9500     | C16-C11-C12 | 119.0(2)   |
| C28-C29    | 1.392(4)   | C16-C11-C1  | 122.8(2)   |
| C29-C30    | 1.374(4)   | C12-C11-C1  | 118.2(2)   |
| C29-H29    | 0.9500     | C13-C12-C11 | 120.4(3)   |
| C30-C31    | 1.472(4)   | C13-C12-H12 | 119.8      |
| O31-C31    | 1.207(3)   | C11-C12-H12 | 119.8      |
| C31-H31    | 0.9500     | C14-C13-C12 | 120.2(3)   |
| C41-C46    | 1.376(4)   | C14-C13-H13 | 119.9      |
| C41-C42    | 1.380(4)   | C12-C13-H13 | 119.9      |
| C42-C43    | 1.387(4)   | C13-C14-C15 | 120.2(3)   |
| C42-H42    | 0.9500     | C13-C14-H14 | 119.9      |
| C43-C44    | 1.374(4)   | C15-C14-H14 | 119.9      |
| C43-H43    | 0.9500     | C14-C15-C16 | 120.0(3)   |
| C44-C45    | 1.375(4)   | C14-C15-H15 | 120.0      |
| C44-H44    | 0.9500     | C16-C15-H15 | 120.0      |
| C45-C46    | 1.390(4)   | C11-C16-C15 | 120.1(3)   |
| C45-H45    | 0.9500     | C11-C16-H16 | 119.9      |
| C46-H46    | 0.9500     | C15-C16-H16 | 119.9      |
| C51-C56    | 1.384(4)   | N22-C21-C30 | 122.2(2)   |
| C51-C52    | 1.389(4)   | N22-C21-C2  | 114.5(2)   |
| C52-C53    | 1.384(4)   | C30-C21-C2  | 123.3(2)   |
| C52-H52    | 0.9500     | C21-N22-C23 | 119.5(2)   |
| C53-C54    | 1.384(4)   | N22-C23-C24 | 118.8(2)   |
| C53-H53    | 0.9500     | N22-C23-C28 | 122.1(2)   |
| C54-C55    | 1.383(4)   | C24-C23-C28 | 119.1(2)   |
| C54-C58    | 1.507(4)   | C25-C24-C23 | 120.1(3)   |
| C55-C56    | 1.385(4)   | C25-C24-H24 | 120.0      |
| C55-H55    | 0.9500     | C23-C24-H24 | 120.0      |
| C56-H56    | 0.9500     | C24-C25-C26 | 121.0(3)   |
| C58-H58A   | 0.9800     | C24-C25-H25 | 119.5      |
| C58-H58B   | 0.9800     | C26-C25-H25 | 119.5      |
| C58-H58C   | 0.9800     | C27-C26-C25 | 120.6(3)   |
| O1-C1-C11  | 119.9(2)   | C27-C26-H26 | 119.7      |
| O1-C1-C2   | 121.6(2)   | C25-C26-H26 | 119.7      |
| C11-C1-C2  | 118.4(2)   | C26-C27-C28 | 119.9(3)   |
| C21-C2-C1  | 108.63(19) | C26-C27-H27 | 120.1      |
| C21-C2-C3  | 110.14(19) | C28-C27-H27 | 120.1      |
| C1-C2-C3   | 112.76(19) | C29-C28-C23 | 116.8(2)   |
| C21-C2-H2  | 108.4      | C29-C28-C27 | 123.8(2)   |
| C1-C2-H2   | 108.4      | C23-C28-C27 | 119.3(2)   |
| C3-C2-H2   | 108.4      | C30-C29-C28 | 121.8(2)   |
| C4-C3-C2   | 110.57(19) | C30-C29-H29 | 119.1      |
| C4-C3-H3A  | 109.5      | C28-C29-H29 | 119.1      |
| C2-C3-H3A  | 109.5      | C29-C30-C21 | 117.5(2)   |
| C4-C3-H3B  | 109.5      | C29-C30-C31 | 116.6(2)   |
| C2-C3-H3B  | 109.5      | C21-C30-C31 | 125.9(2)   |
| H3A-C3-H3B | 108.1      | O31-C31-C30 | 127.7(3)   |
| C5-C4-C3   | 124.3(2)   | O31-C31-H31 | 116.1      |
| C5-C4-H4   | 117.8      | C30-C31-H31 | 116.1      |
| C3-C4-H4   | 117.8      | C46-C41-C42 | 121.0(3)   |
| C4-C5-N11  | 124.6(2)   | C46-C41-N11 | 119.1(2)   |
| C4-C5-H5   | 117.7      | C42-C41-N11 | 119.9(2)   |
| N11-C5-H5  | 117.7      | C41-C42-C43 | 118.9(3)   |
| O12-S1-O13 | 120.67(12) | C41-C42-H42 | 120.6      |
| O12-S1-N11 | 106.31(11) | C43-C42-H42 | 120.6      |
| O13-S1-N11 | 106.15(11) | C44-C43-C42 | 120.5(3)   |
| O12-S1-C51 | 108.20(12) | C44-C43-H43 | 119.7      |
| O13-S1-C51 | 107.87(12) | C42-C43-H43 | 119.7      |
| N11-S1-C51 | 106.89(11) | C43-C44-C45 | 120.2(3)   |

|               |          |
|---------------|----------|
| C43-C44-H44   | 119.9    |
| C45-C44-H44   | 119.9    |
| C44-C45-C46   | 119.9(3) |
| C44-C45-H45   | 120.1    |
| C46-C45-H45   | 120.1    |
| C41-C46-C45   | 119.5(3) |
| C41-C46-H46   | 120.3    |
| C45-C46-H46   | 120.3    |
| C56-C51-C52   | 119.8(3) |
| C56-C51-S1    | 120.0(2) |
| C52-C51-S1    | 120.2(2) |
| C53-C52-C51   | 119.5(3) |
| C53-C52-H52   | 120.3    |
| C51-C52-H52   | 120.3    |
| C54-C53-C52   | 121.2(3) |
| C54-C53-H53   | 119.4    |
| C52-C53-H53   | 119.4    |
| C55-C54-C53   | 118.7(3) |
| C55-C54-C58   | 120.4(3) |
| C53-C54-C58   | 120.9(3) |
| C54-C55-C56   | 120.9(3) |
| C54-C55-H55   | 119.5    |
| C56-C55-H55   | 119.5    |
| C51-C56-C55   | 119.9(3) |
| C51-C56-H56   | 120.0    |
| C55-C56-H56   | 120.0    |
| C54-C58-H58A  | 109.5    |
| C54-C58-H58B  | 109.5    |
| H58A-C58-H58B | 109.5    |
| C54-C58-H58C  | 109.5    |
| H58A-C58-H58C | 109.5    |
| H58B-C58-H58C | 109.5    |

---

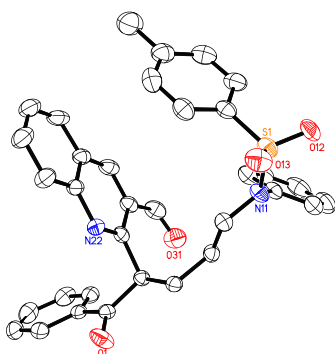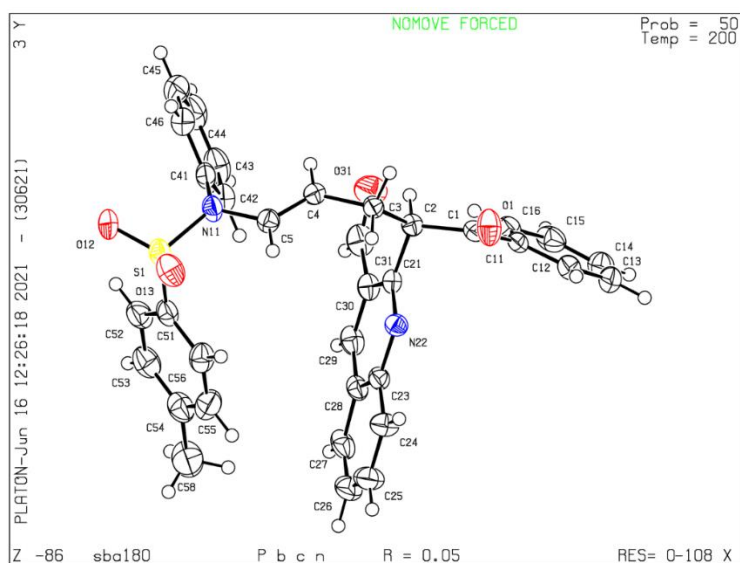

sba180: colourless crystal (brick), dimensions 0.168 x 0.077 x 0.063 mm<sup>3</sup>, crystal system orthorhombic, space group Pbcn, Z=8, a=13.7850(6) Å, b=14.0217(7) Å, c=29.4717(13) Å, alpha=90 deg, beta=90 deg, gamma=90 deg, V=5696.6(5) Å<sup>3</sup>, rho=1.307 g/cm<sup>3</sup>, T=200(2) K, Theta<sub>max</sub>= 27.071 deg, radiation MoKα, lambda=0.71073 Å, 0.5 deg omega-scans with CCD area detector, covering the asymmetric unit in reciprocal space with a mean redundancy of 5.95 and a completeness of 99.3% to a resolution of 0.78 Å, 38791 reflections measured, 6215 unique (R(int)=0.0840), 3596 observed (I > 2σ(I)), intensities were corrected for Lorentz and polarization effects, an empirical scaling and absorption correction was applied using SADABS<sup>[1]</sup> based on the Laue symmetry of the reciprocal space, mu=0.16 mm<sup>-1</sup>, T<sub>min</sub>=0.92, T<sub>max</sub>=0.96, structure solved with SHELXT-2018/2 (Sheldrick 2015)<sup>[2]</sup> and refined against F<sup>2</sup> with a Full-matrix least-squares algorithm using the SHELXL-2018/3 (Sheldrick, 2018) software<sup>[3]</sup>, 371 parameters refined, hydrogen atoms were treated using appropriate riding models, goodness of fit 1.01 for observed reflections, final residual values R1(F)=0.054, wR(F<sup>2</sup>)=0.105 for observed reflections, residual electron density -0.34 to 0.24 eÅ<sup>-3</sup>. CCDC 2175887 contains the supplementary crystallographic

data for this paper. The data can be obtained free of charge from The Cambridge Crystallographic Data Centre via [www.ccdc.cam.ac.uk/structures](http://www.ccdc.cam.ac.uk/structures).

Lit. 1: (SADABS-2016/2 - Bruker AXS area detector scaling and absorption correction)  
Krause, L., Herbst-Irmer, R., Sheldrick G.M. & Stalke D., *J. Appl. Cryst.* 48 (2015) 3-10.

Lit. 2: (SHELXT - Integrated space-group and crystal structure determination)  
Sheldrick G. M., *Acta Cryst.* A71 (2015) 3-8.

Lit. 3: (program SHELXL-2018/3 (Sheldrick, 2018) for structure refinement)  
Sheldrick G. M., *Acta Cryst.* (2015). C71, 3-8

Lit. APEX, APEX2, SMART, SAINT, SAINT-Plus:  
Bruker (2007). "Program name(s)". Bruker AXS Inc., Madison, Wisconsin, USA.

## 5. References

1. Motaghi, M.; Khosravi, H.; Balalaie, S.; Rominger, F. Catalytic formal [4+ 1] isocyanide-based cycloaddition: an efficient strategy for the synthesis of 1 *H*-cyclopenta quinolin-1-one derivatives. *Org. Biomol. Chem.*, **2019**, *17*, 275-282.
2. Cui, J.; Meng, L.; Chi, X.; Liu, Q.; Zhao, P.; Zhang, D. P.; Chen, L.; Li, X.; Dong, Y.; Liu, H. A palladium-catalyzed regiocontrollable hydroarylation reaction of allenamides with B2pin2/H2O. *Chemical Communications Chem Commun.* **2019**, *55*, 4355-4358.
